# Supplementary material for: Impairment of Multiple Mitochondrial Energy Metabolism Pathways in the Heart of Chagas Disease Cardiomyopathy Patients
Source: PubMed Central journal article supplement (PMC8633876; doi:10.3389/fimmu.2021.755782), 2021-11-12

### Sample labeling

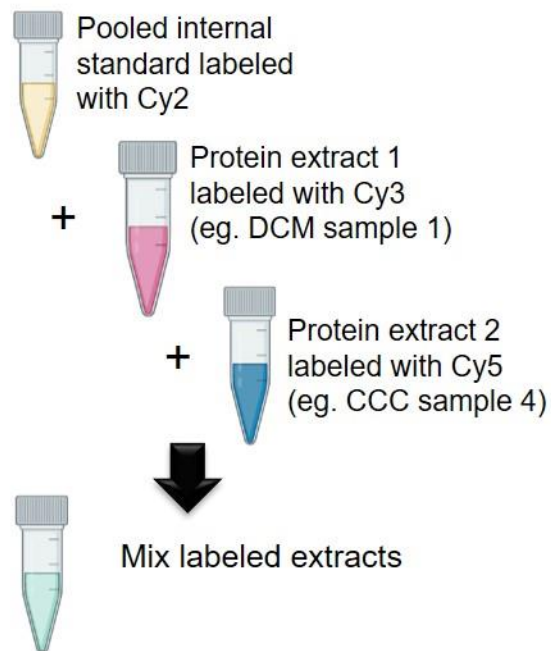

### 2-D electrophoresis separation

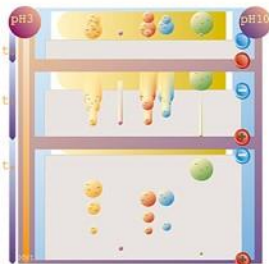

### Image acquisition and analysis

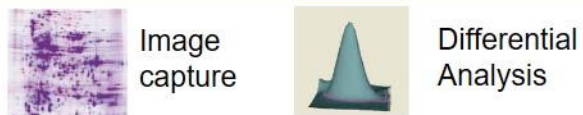

### Analytical Gels

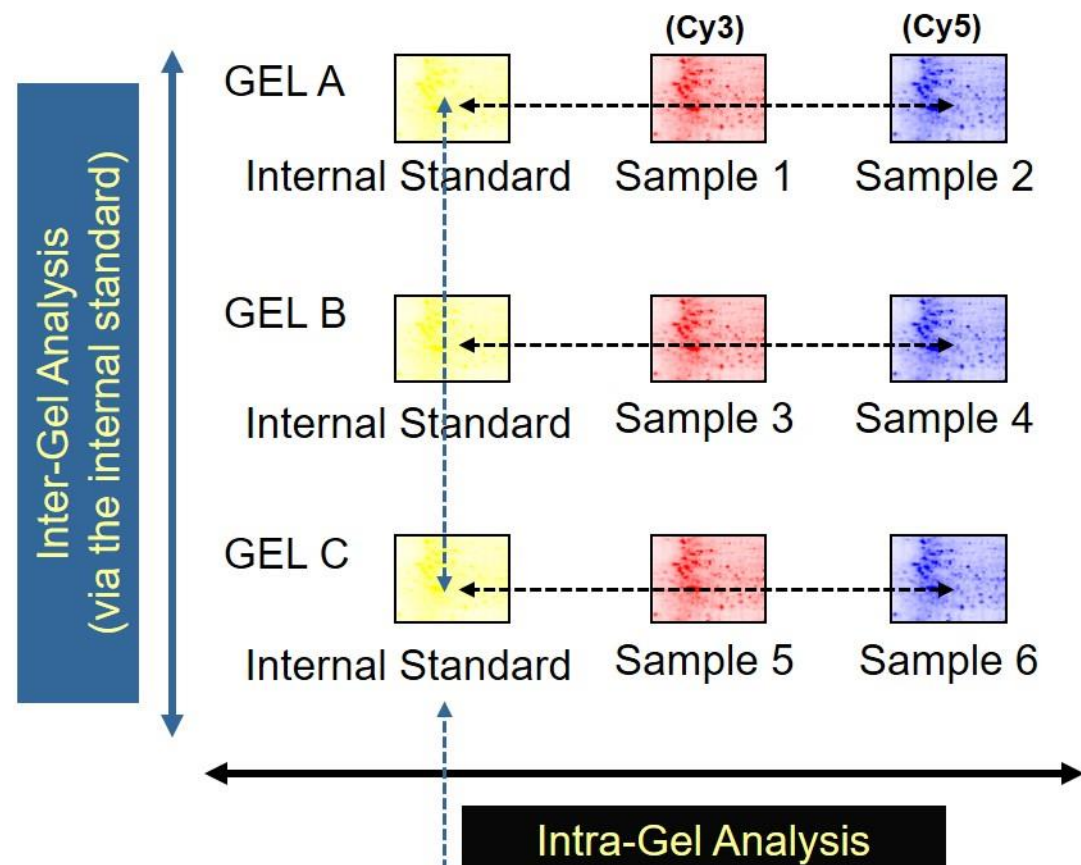

Gel for protein  
identification by  
MS

### Preparative Gel

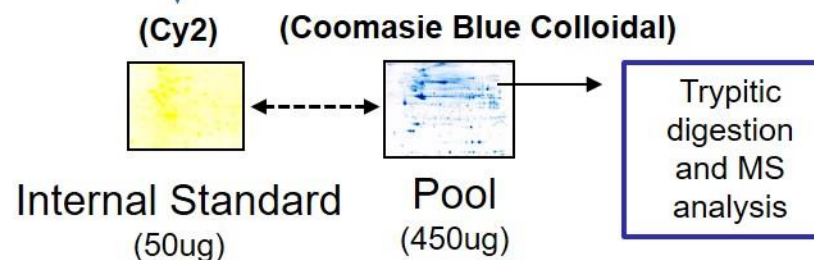

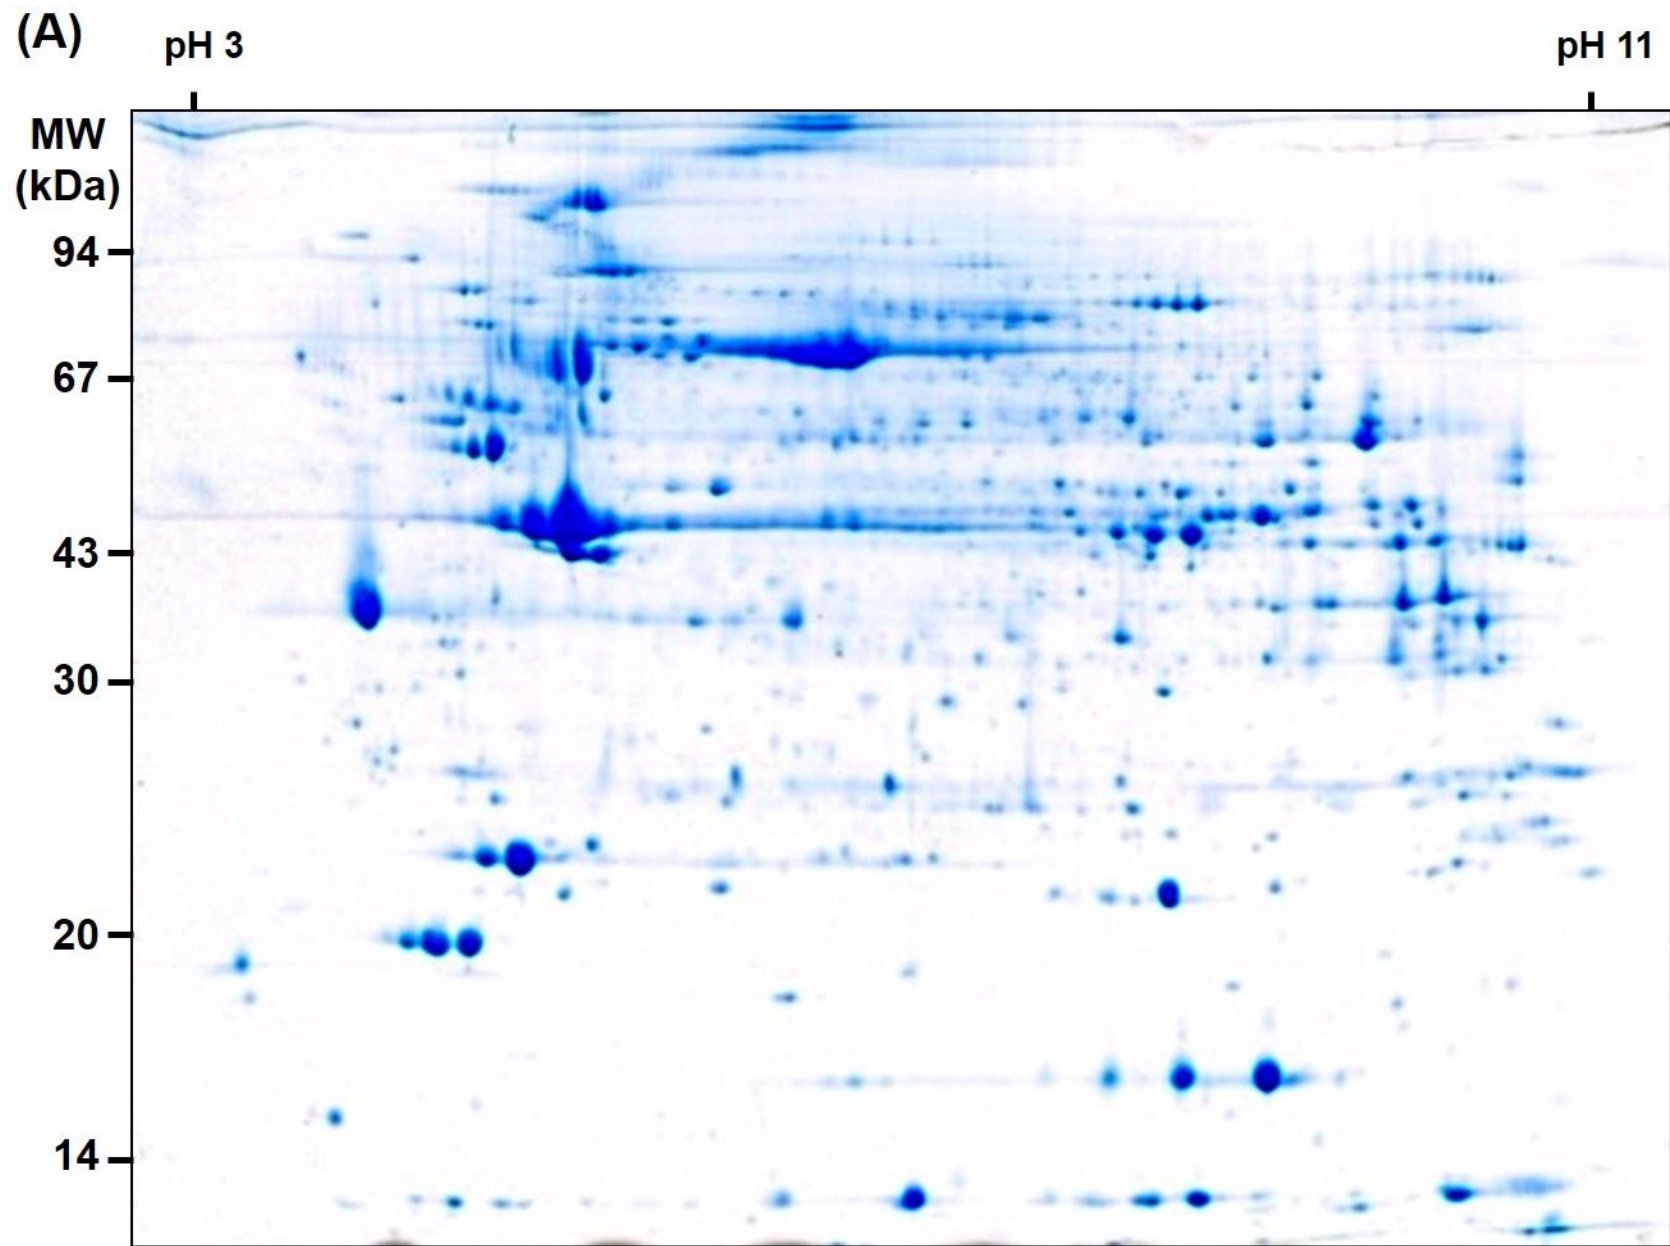

Supplemental  
Figure S2a

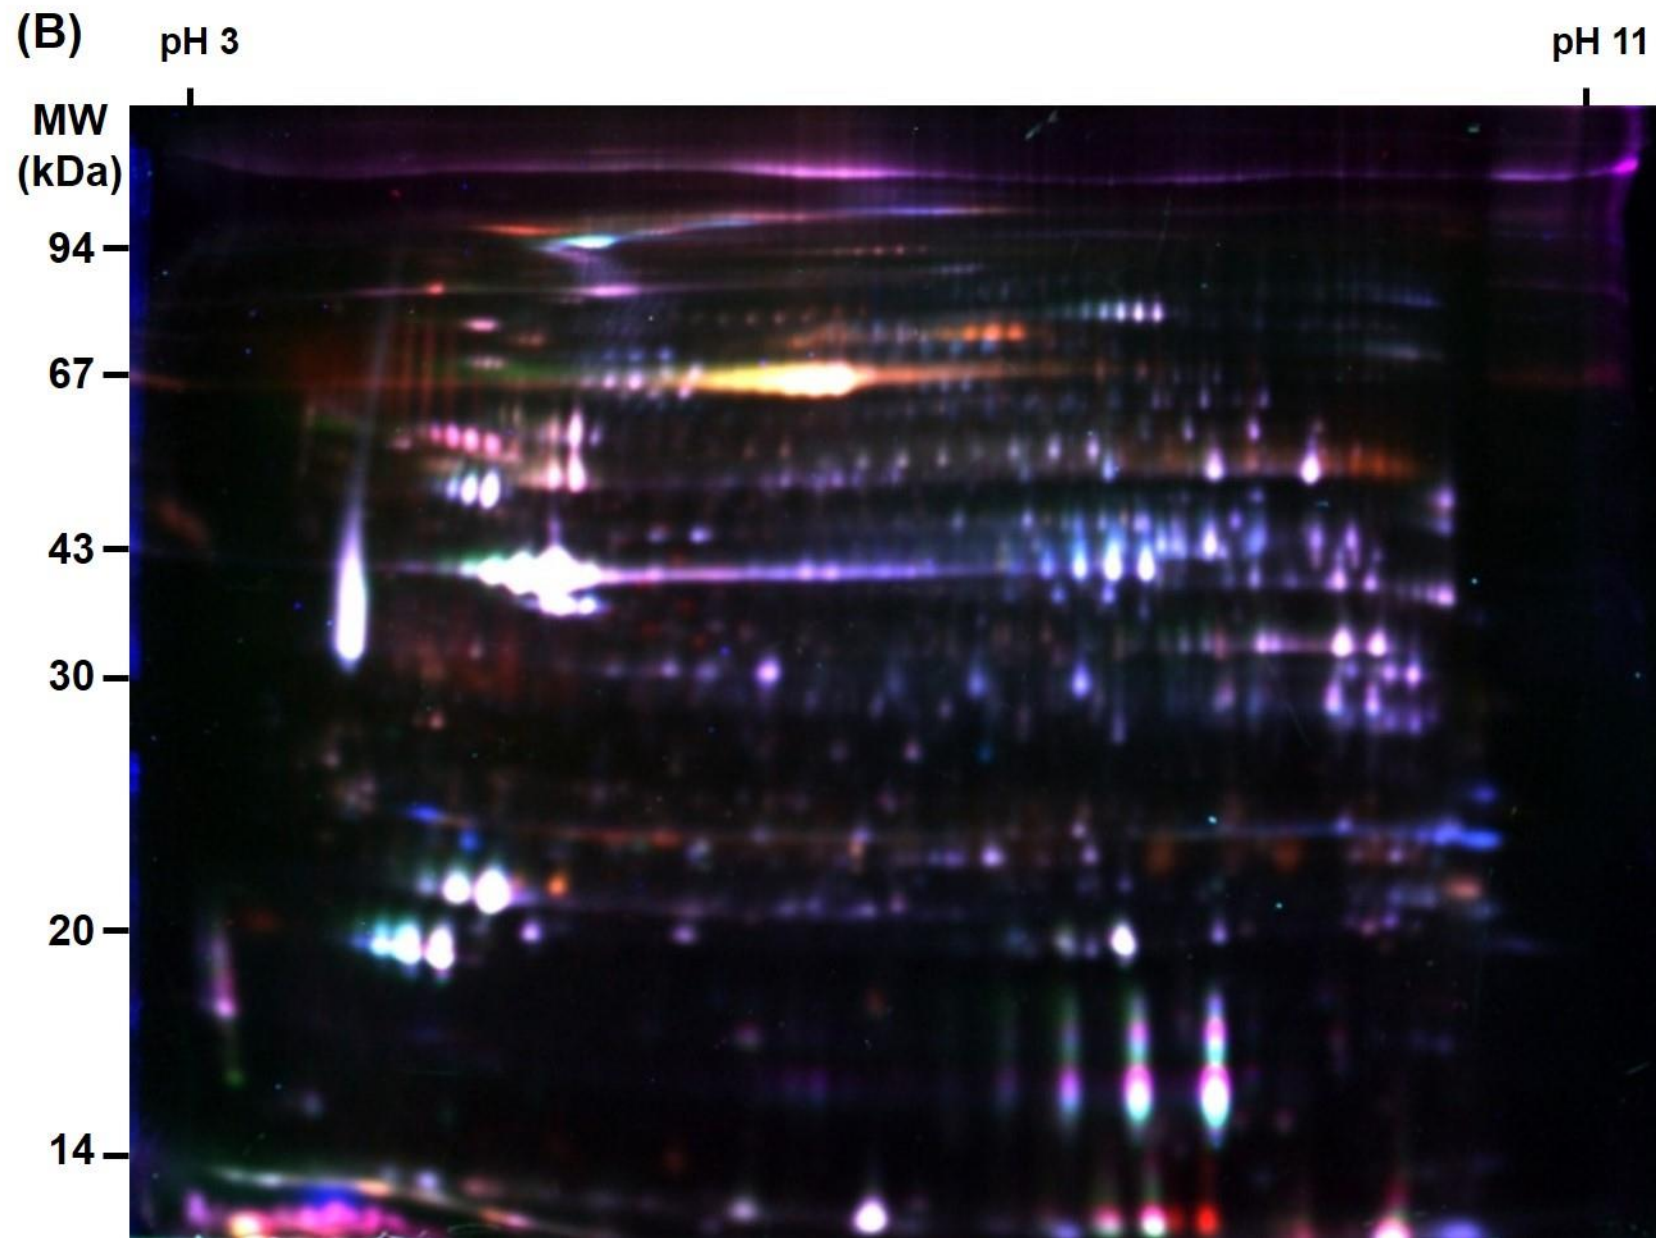

Supplemental  
Figure S2b



(C)

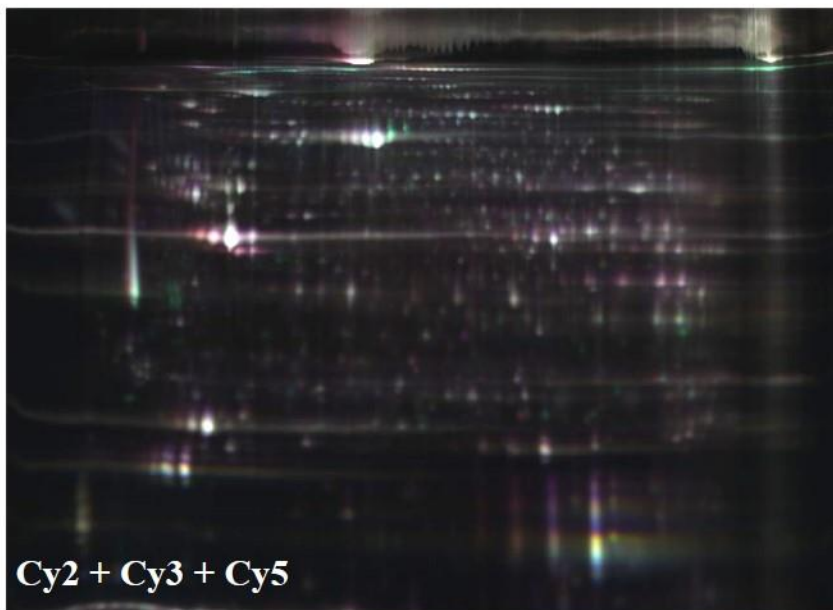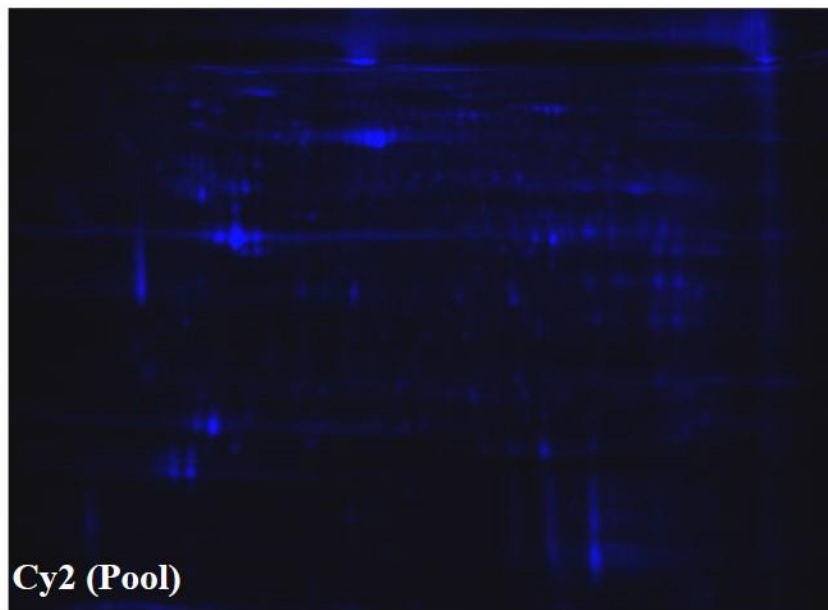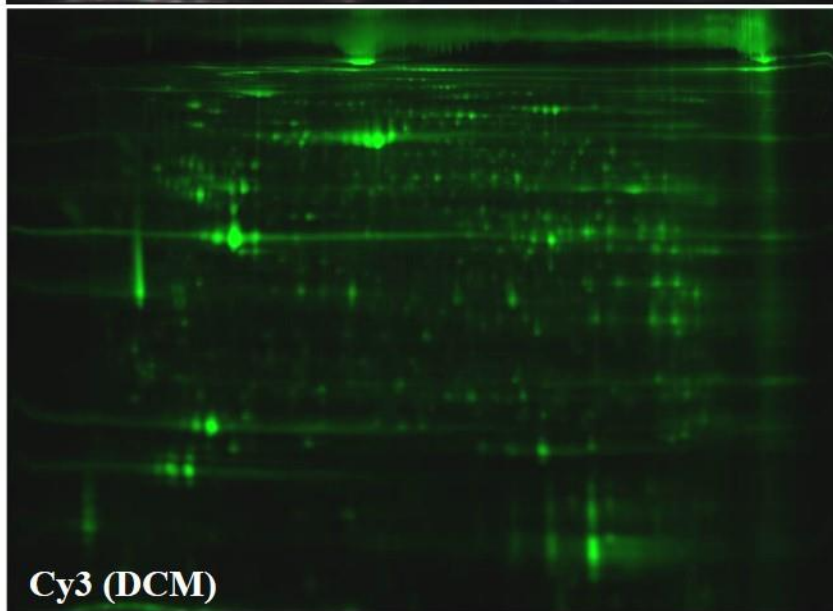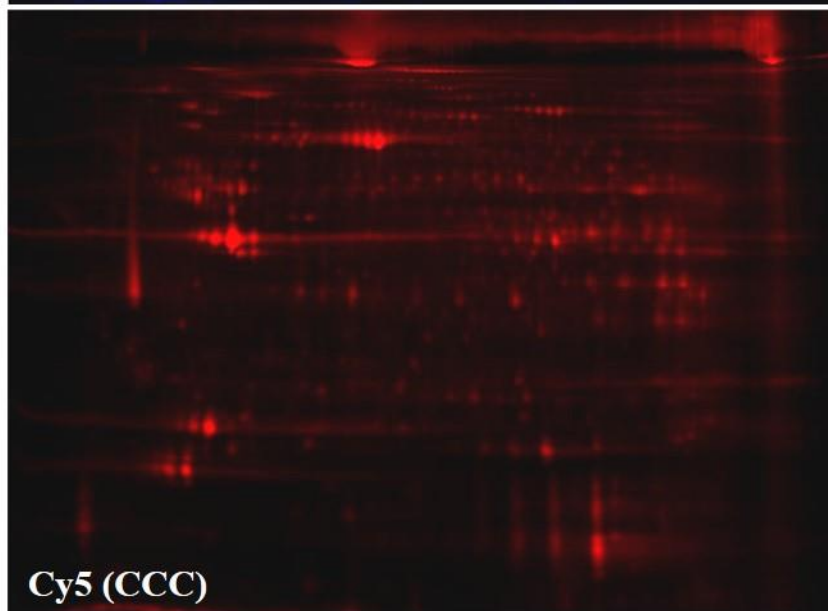

Supplemental  
Figure S2c

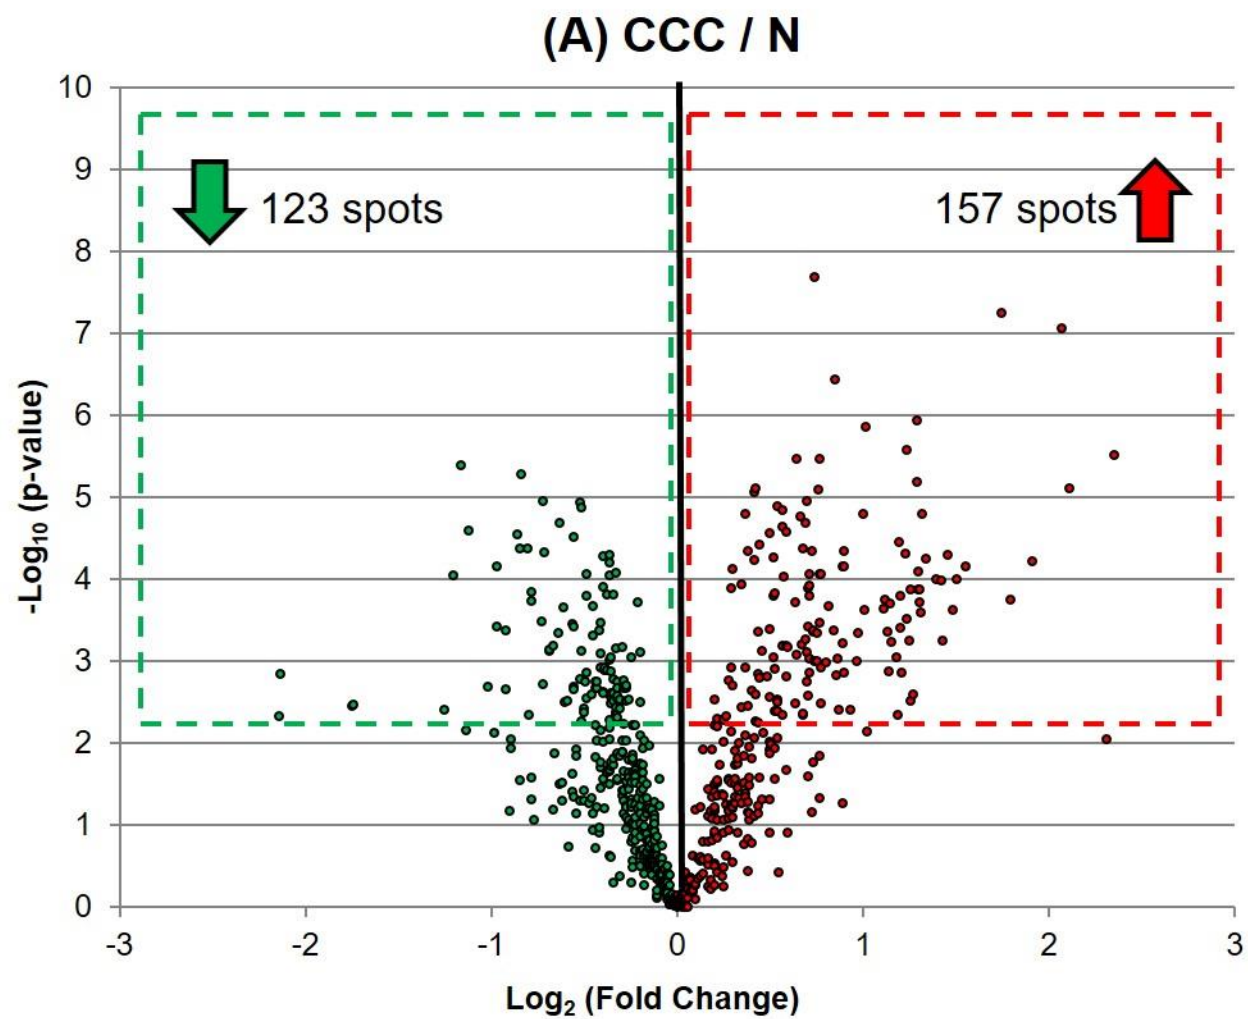

(B) DCM / N

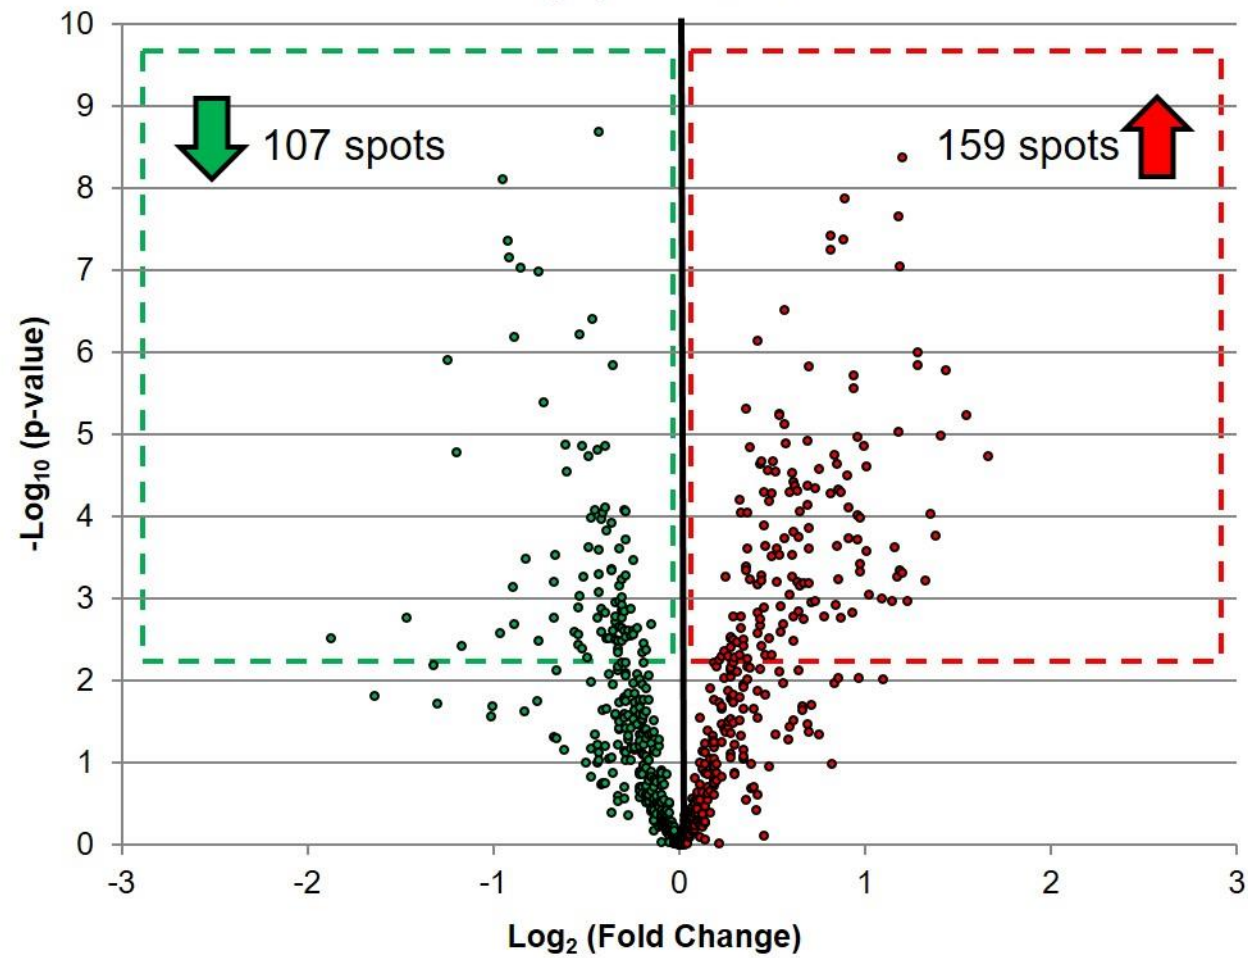

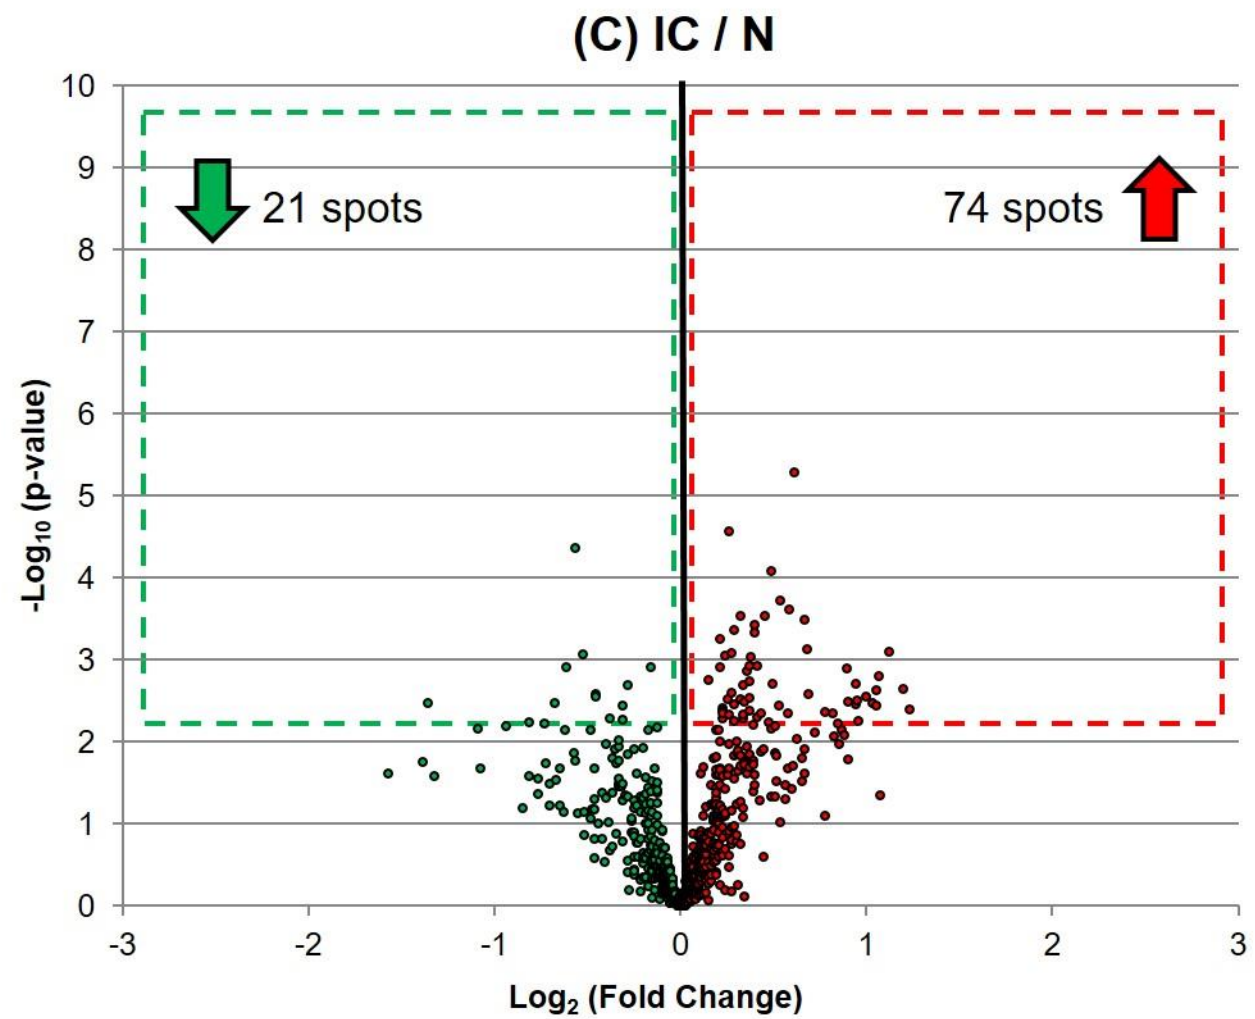

(A) Number of Spots with Increased Expression

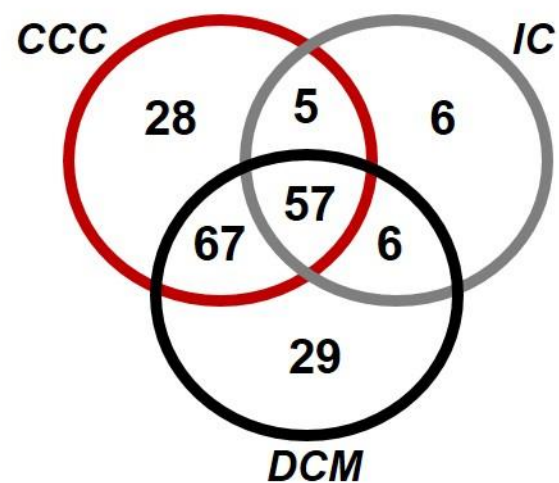

(B) Number of Spots with Decreased Expression

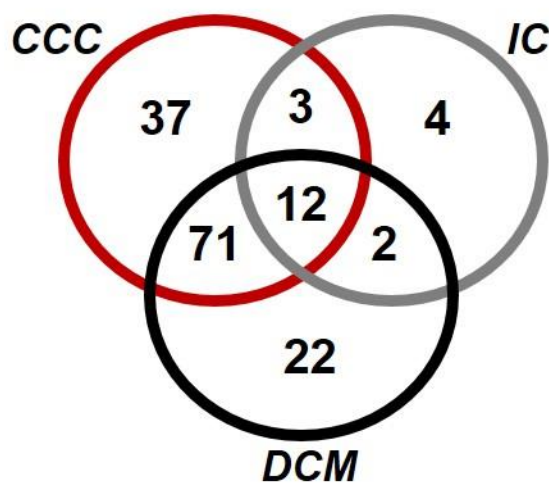



### (A) Cellular Component

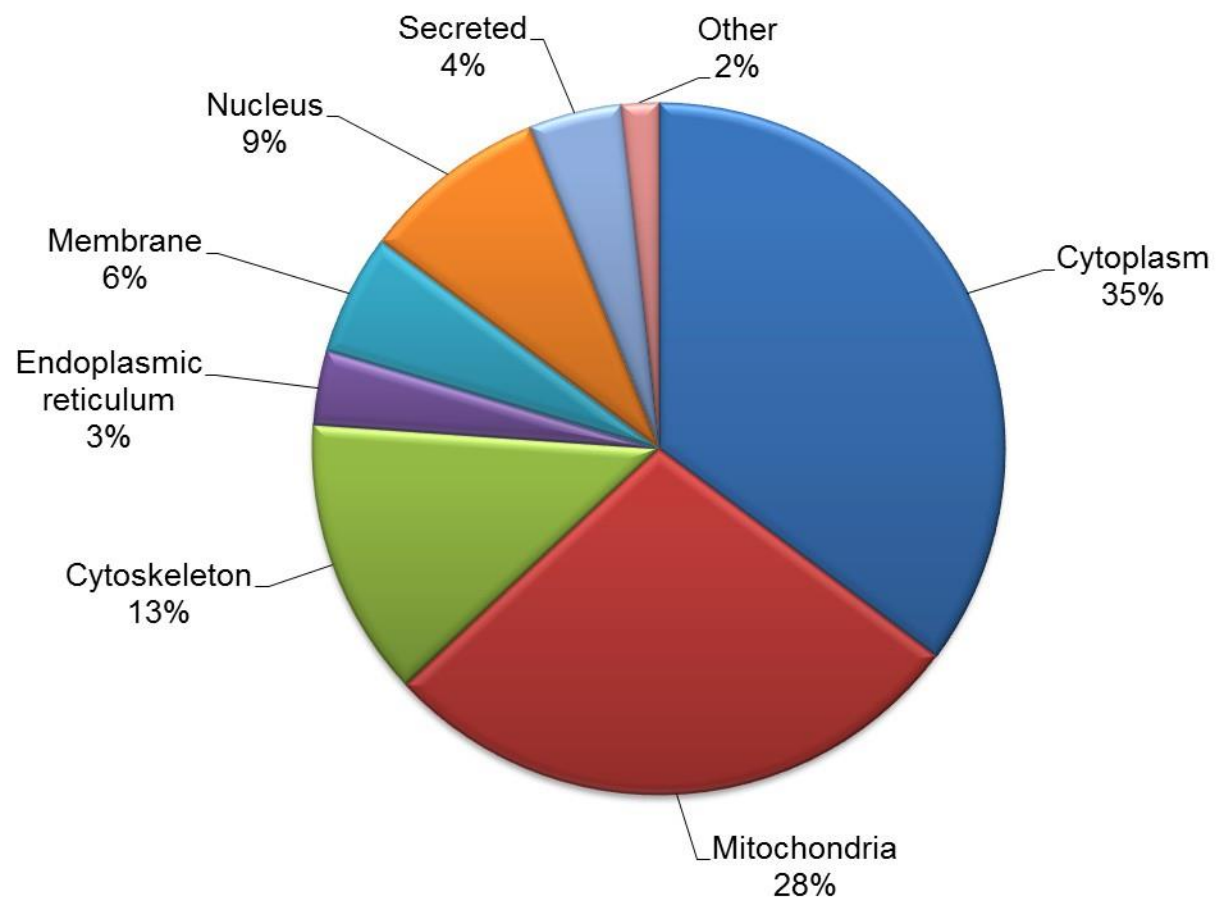

## (B) Biological Process

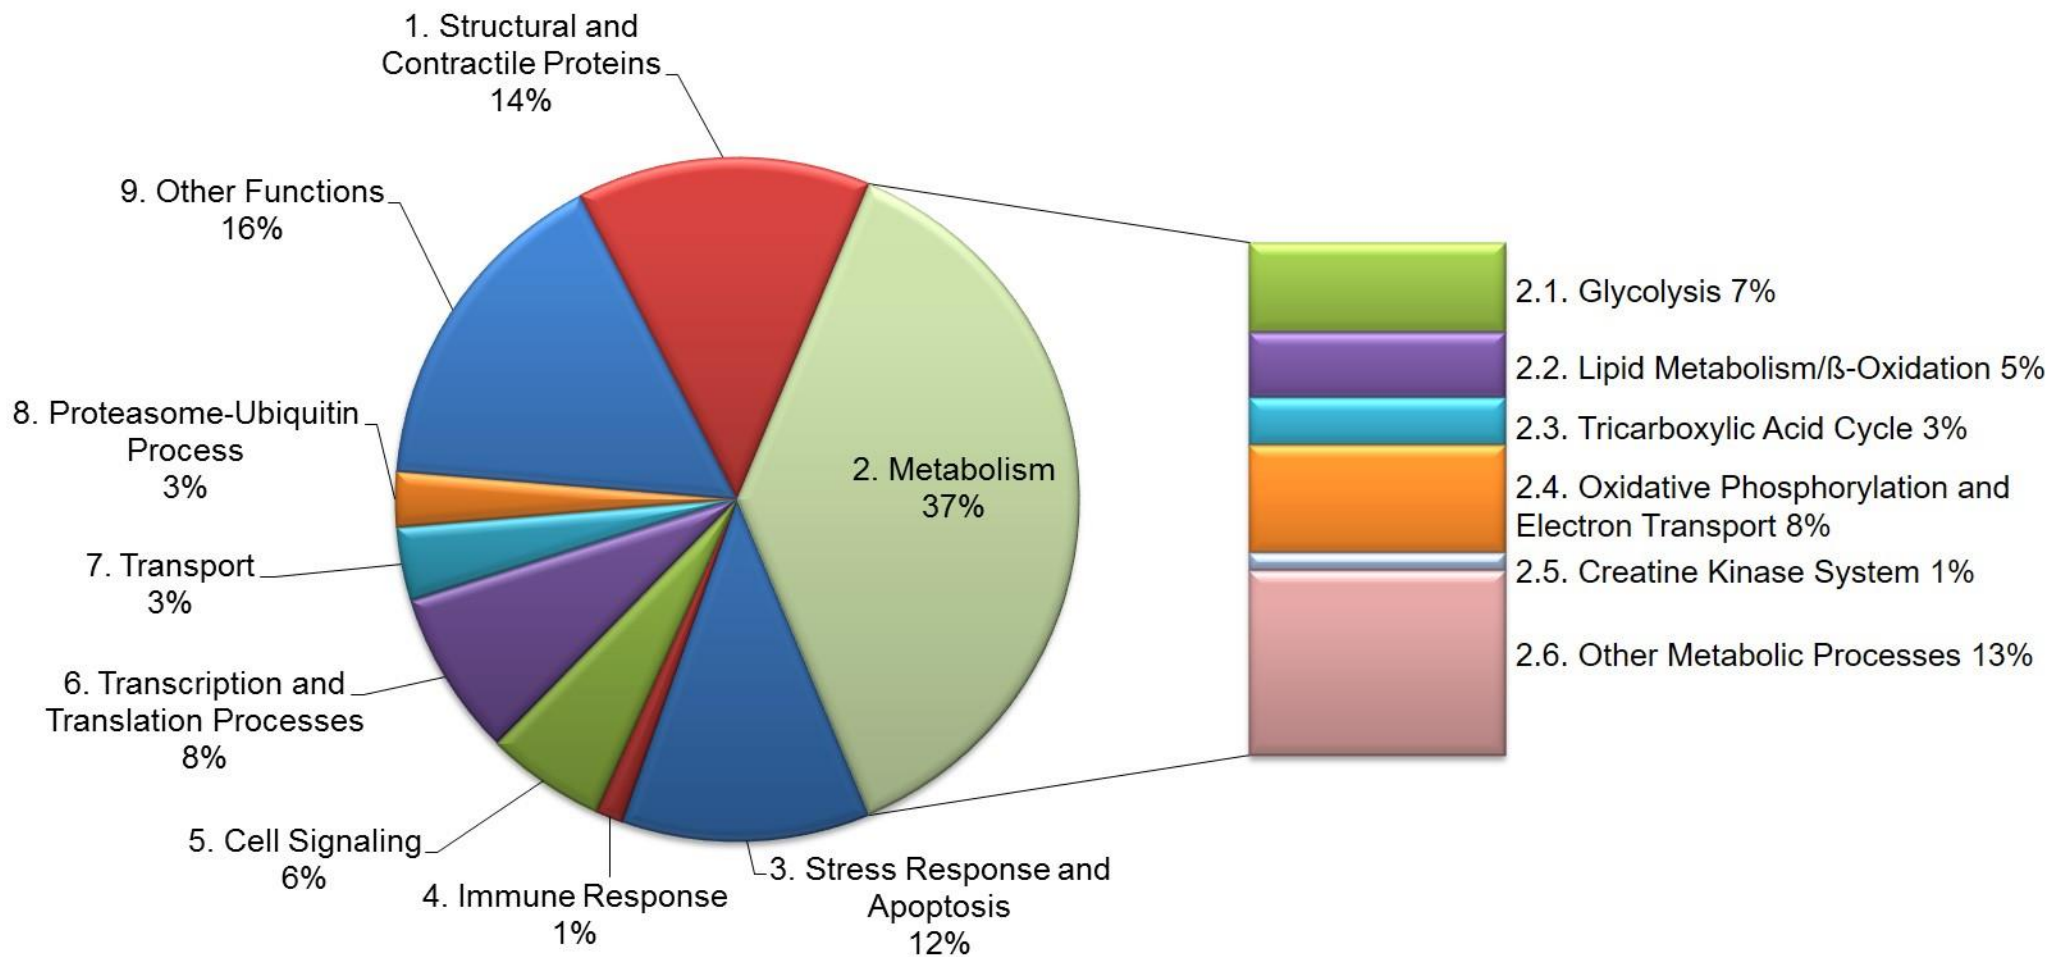

(A)

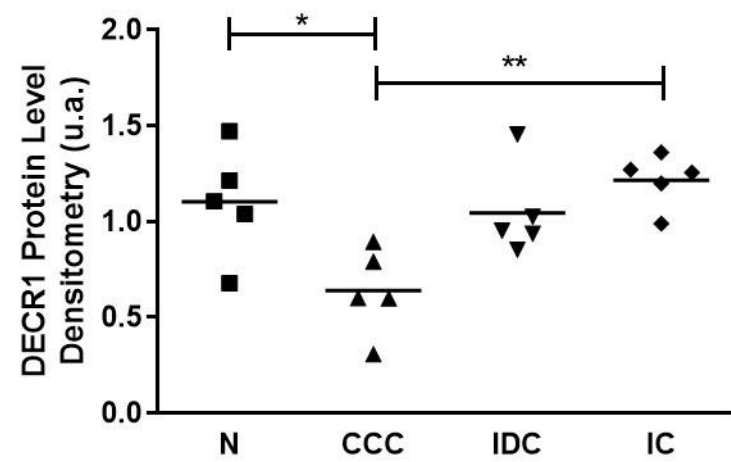

(B)

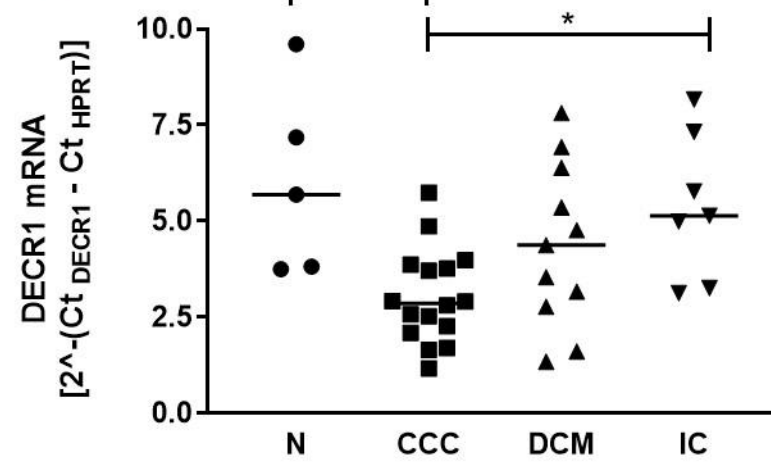

# (A) Glycolysis

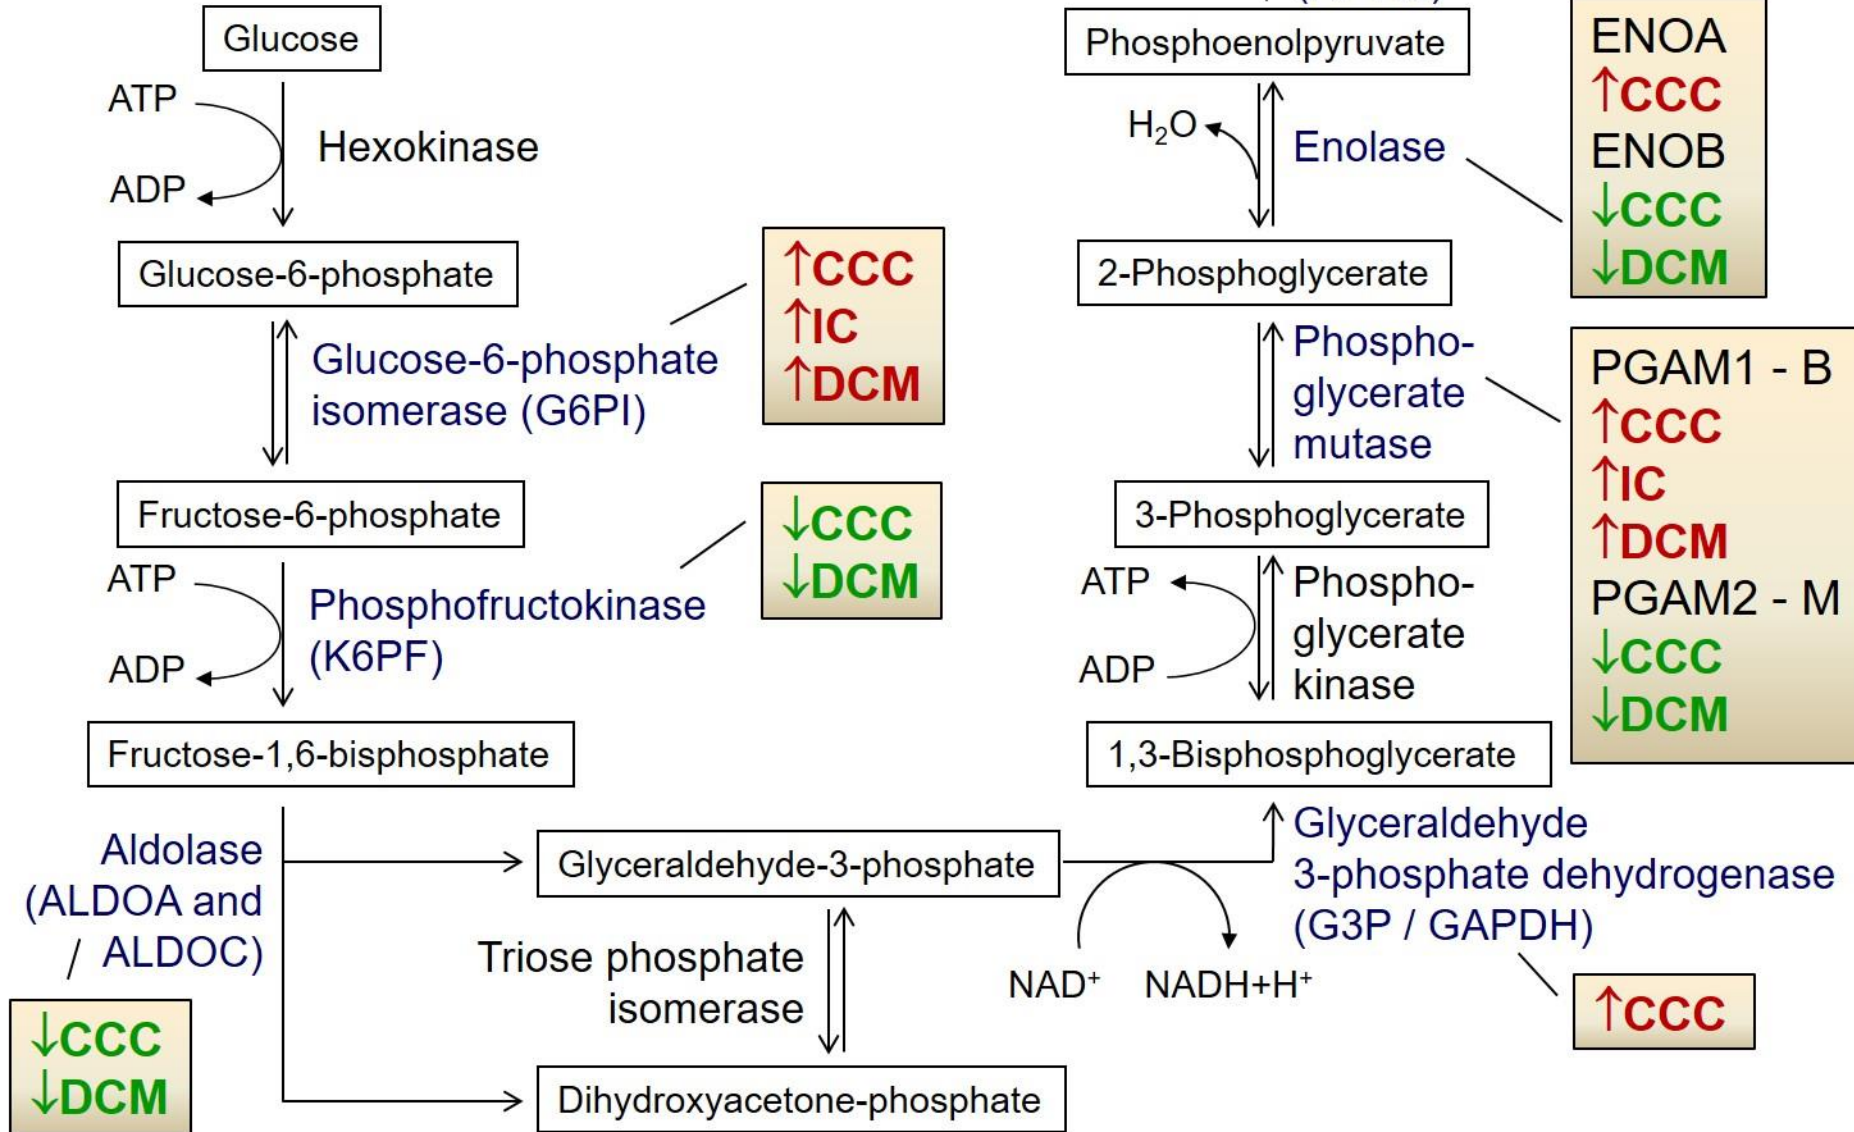

Supplemental  
Figure S7a



## (B) Citric Acid Cycle

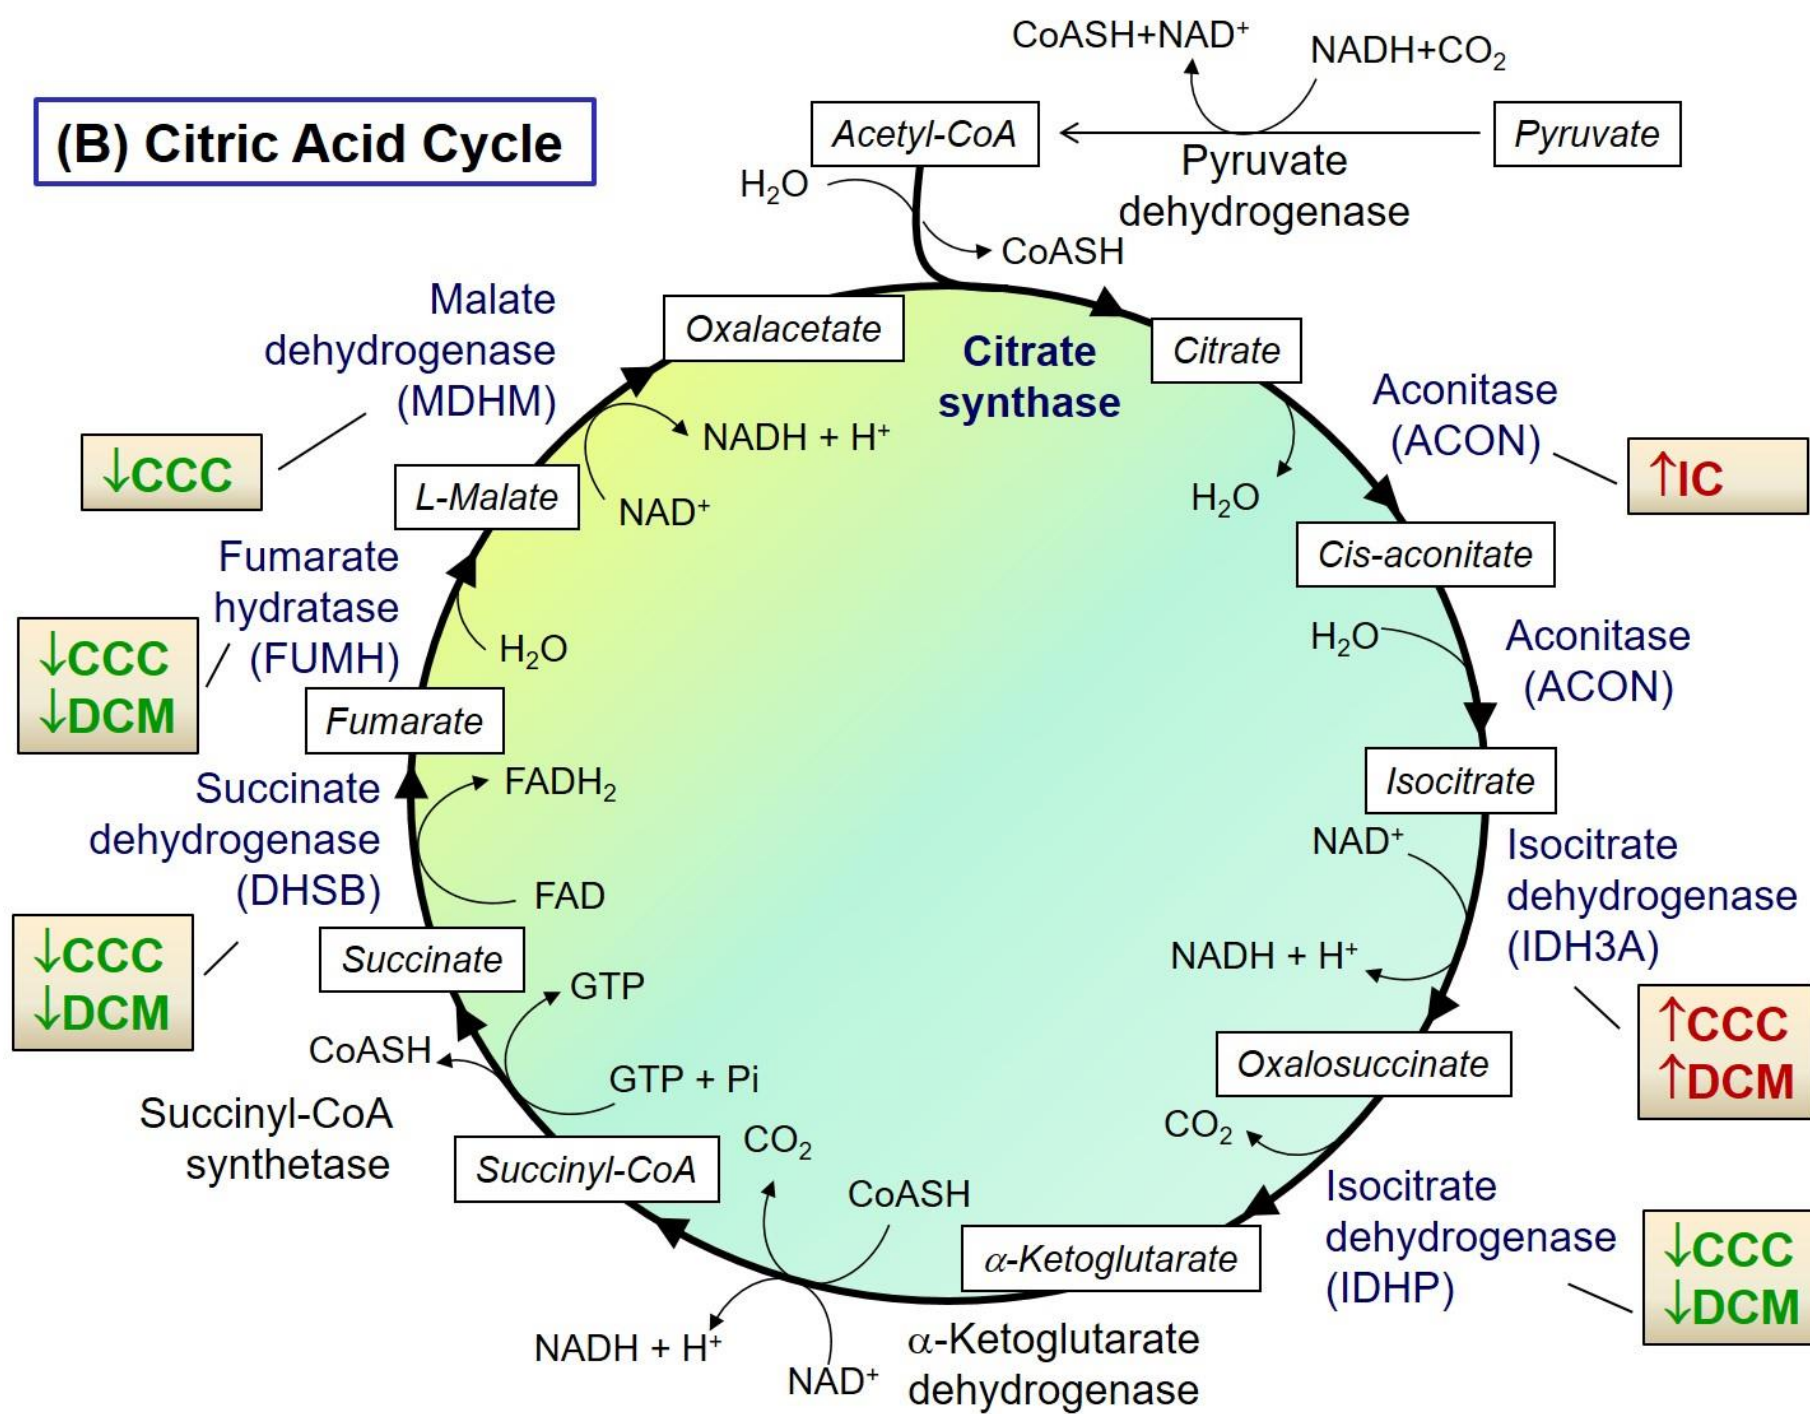

Supplemental  
Figure S7b

**(C) Oxidative Phosphorylation**

Complex I  
*NADH:ubiquinone oxidoreductase*  
 NDUS3 - ↑**CCC** ↑**IC**  
 NDUV2 - ↓**CCC** ↓**IC** ↓**DCM**  
 NDUAA - ↓**CCC** ↓**DCM**  
 NDUV1 - ↓**CCC** ↓**DCM**  
 NDUS1 - ↓**CCC**

Supplemental  
 Figure S7c

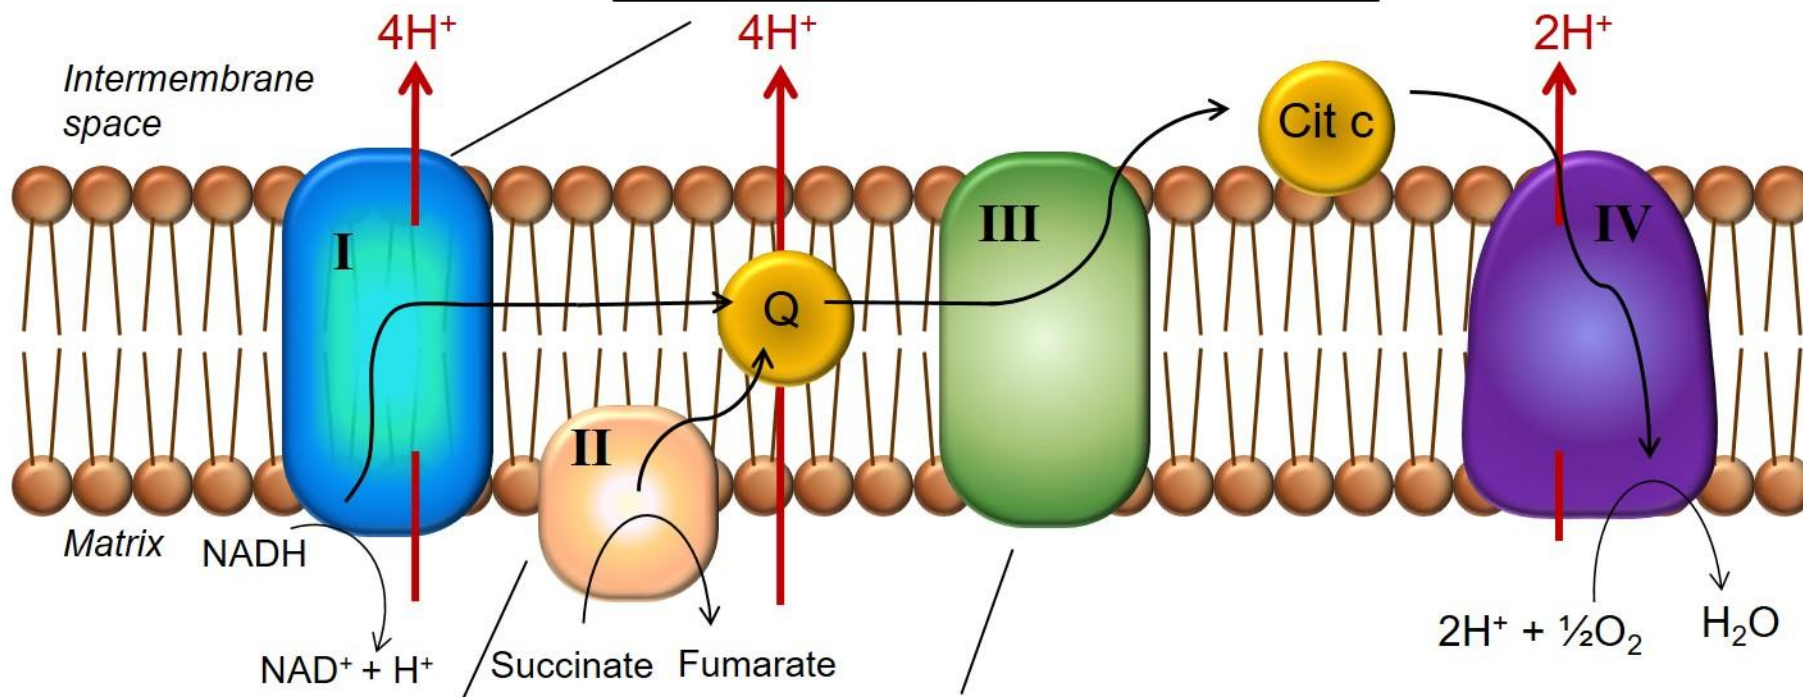

Complex II  
*Succinate dehydrogenase*  
 DHSA - ↑**CCC** ↑**IC** ↑**DCM**  
 DHSB - ↓**CCC** ↓**IC** ↓**DCM**

Complex III  
*Ubiquinone:cytochrome c oxidoreductase*  
 QCR1 - ↓**CCC** ↓**DCM**  
 QCR2 - ↓**CCC** ↓**DCM**

**(D) Creatine Kinase System**

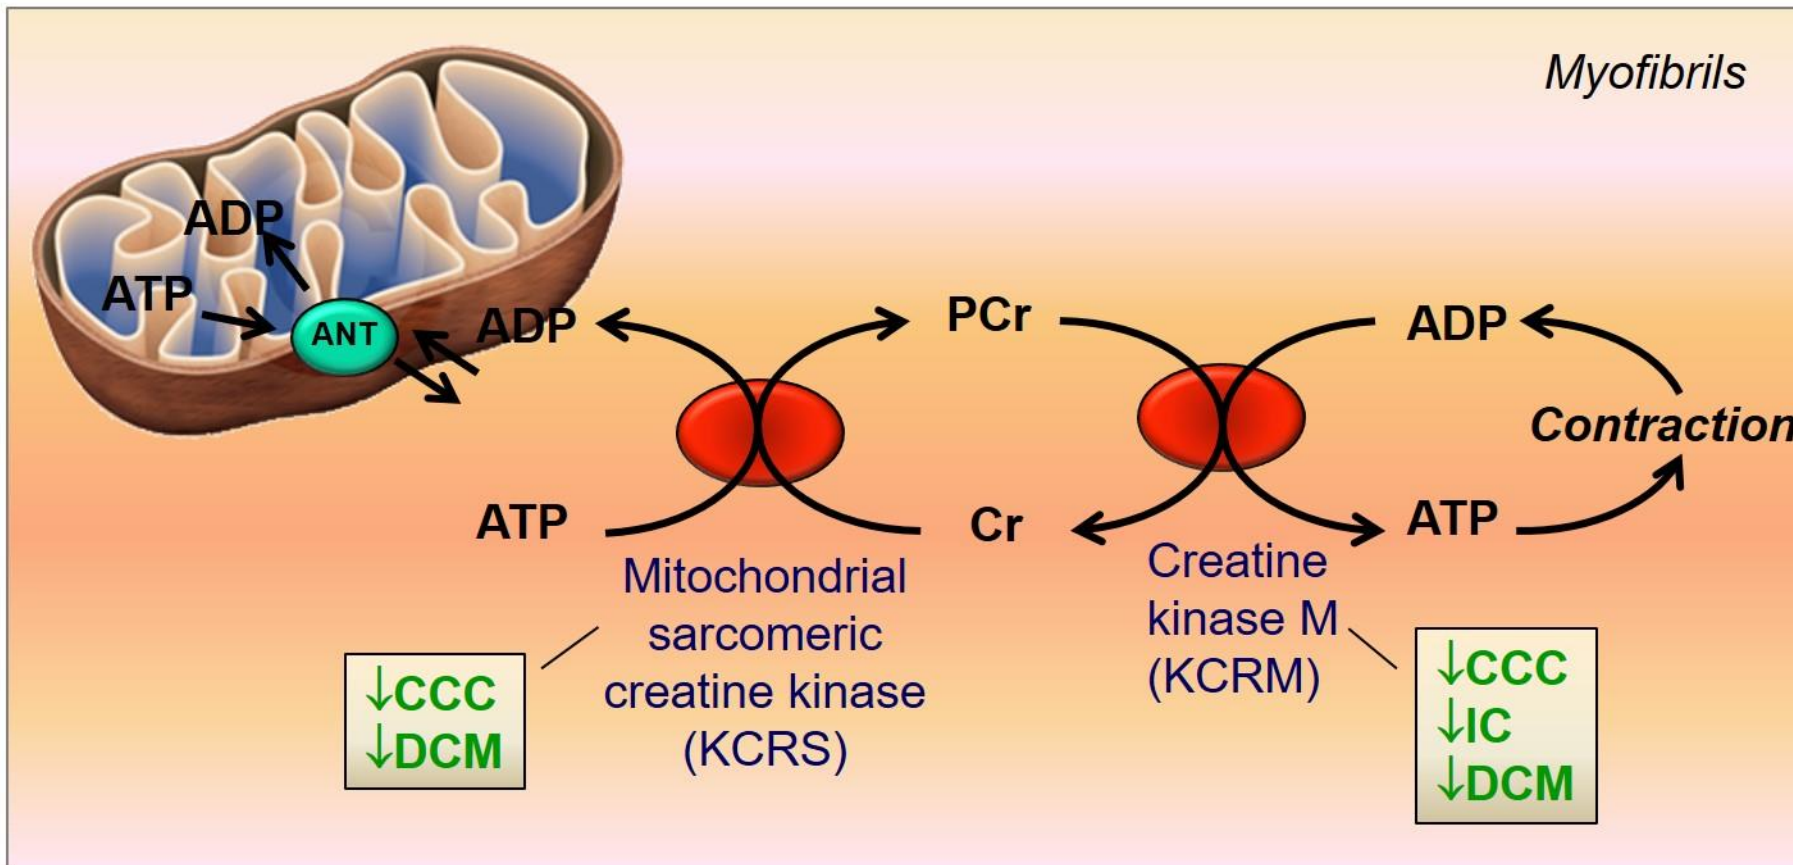



# Sarcomeric proteins

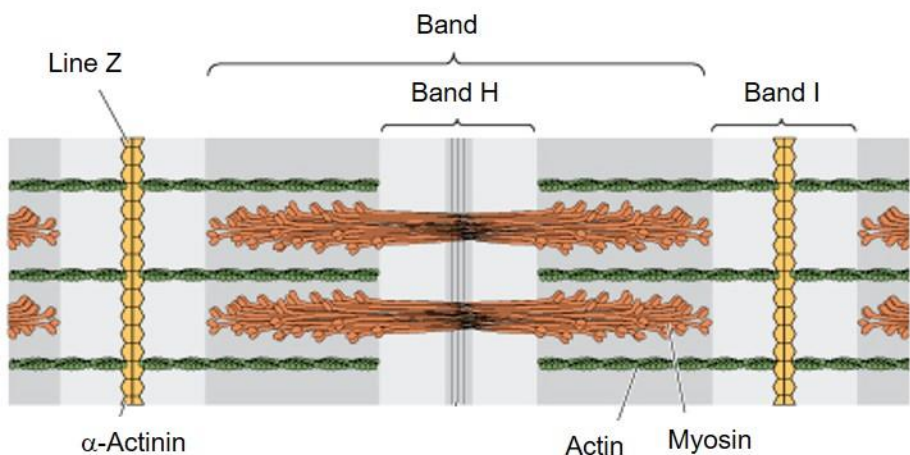

**TBA1C**  
 ↑CCC  
 ↑DCM

**TBB5**  
 ↑CCC  
 ↑DCM

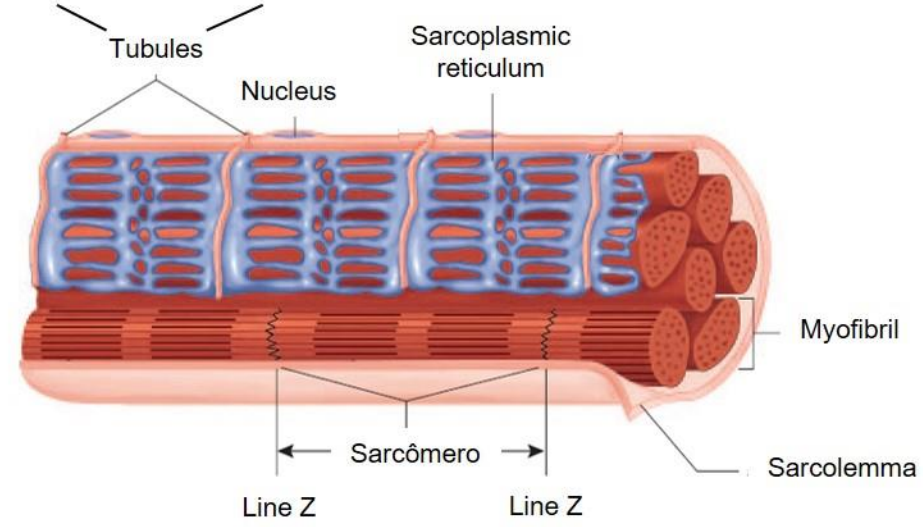

**ACTN2**  
 ↓CCC  
 ↓IC

**ACTC**  
 ↓CCC  
 ↓IC  
 ↓DCM

**MYL3**  
 ↓CCC  
 ↓DCM

**MYL2**  
 ↓CCC  
 ↓DCM

**MYH7**  
 ↓CCC  
 ↓IC  
 ↓DCM

**MYL4**  
 ↓CCC

**TnT**  
 ↓CCC  
 ↓DCM

**TnI**  
 ↑CCC  
 ↑IC  
 ↑DCM

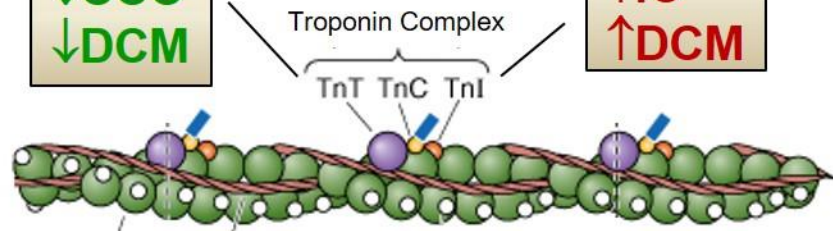

**TPM1**  
 ↓CCC

Supplemental Figure S8



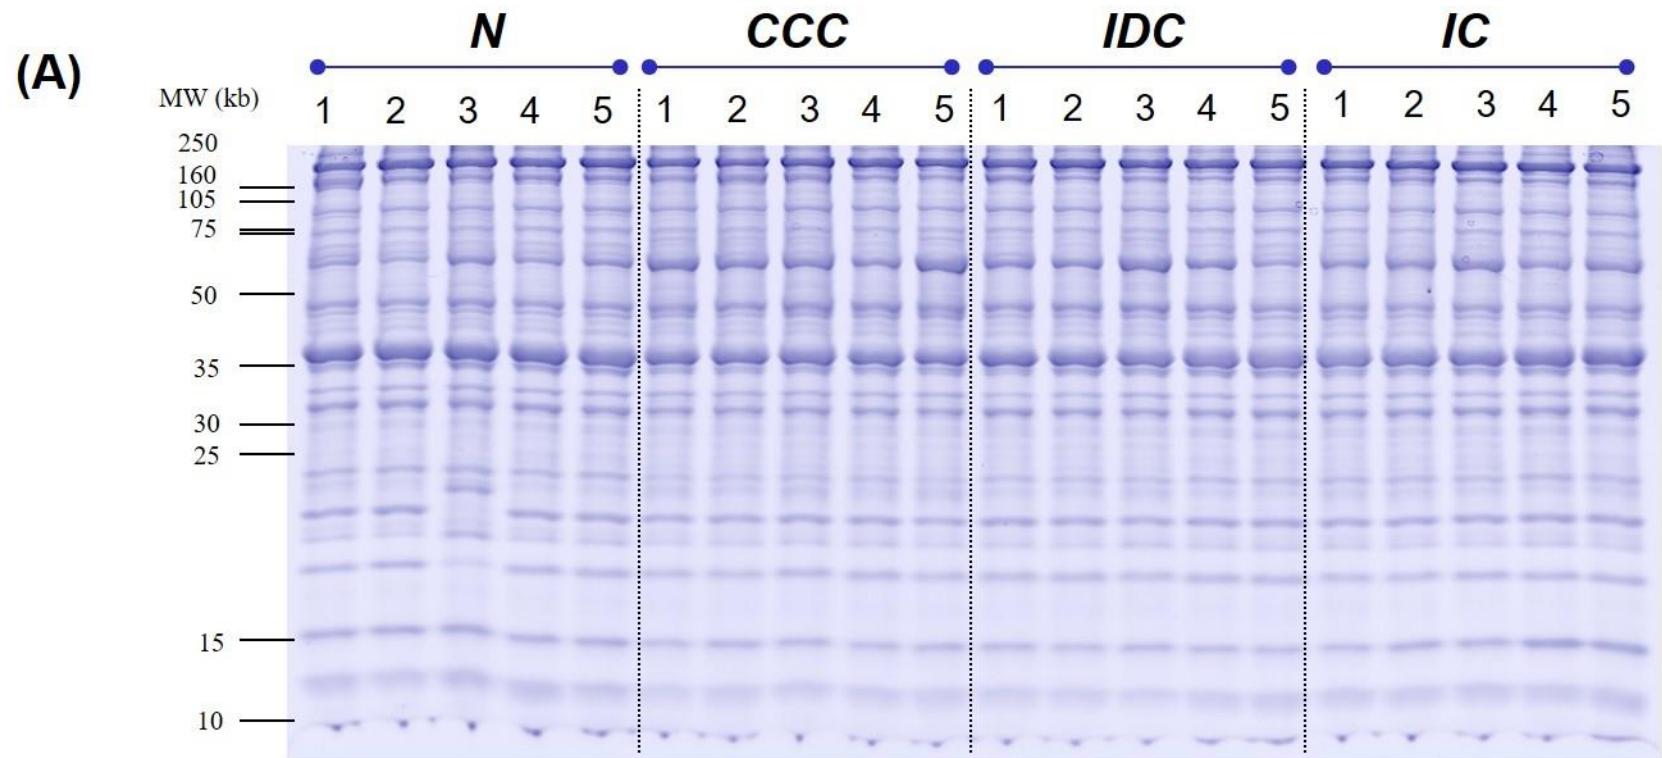

Supplemental  
Figure S9

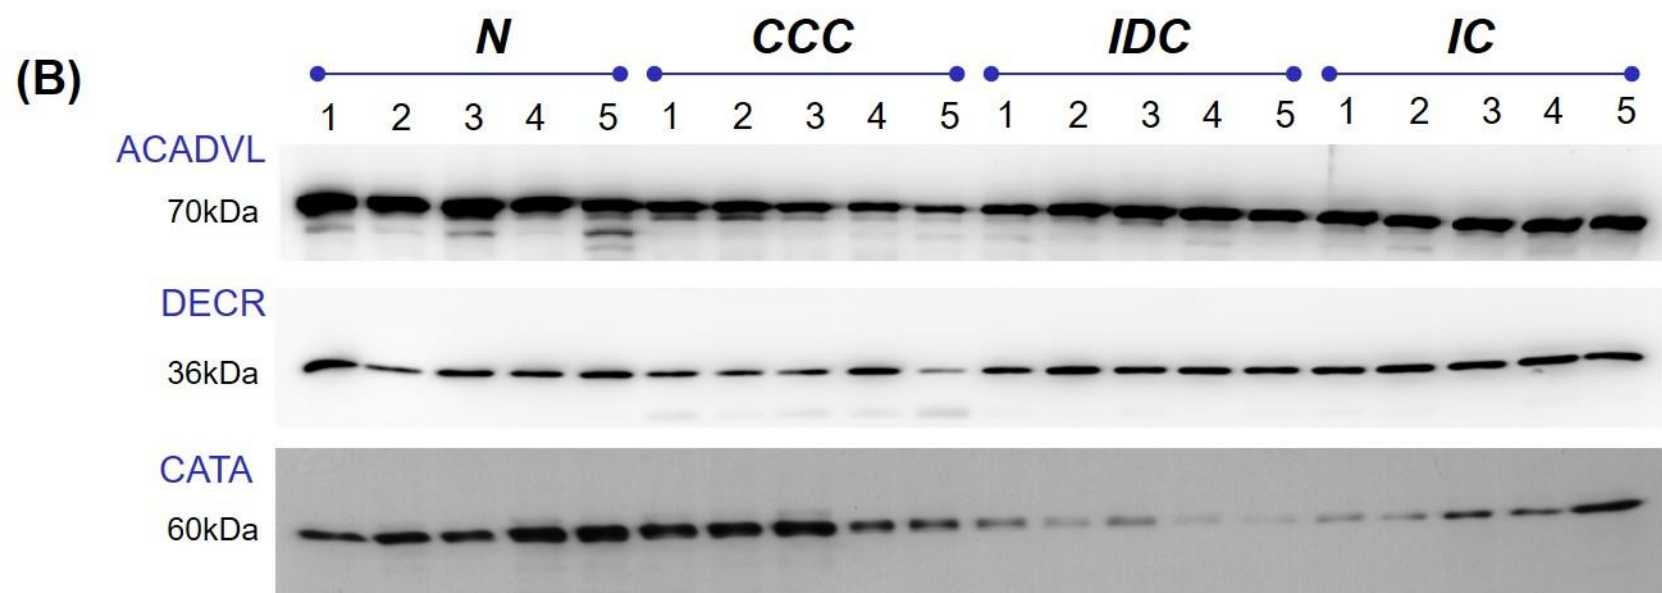

Supplement: DataSheet_1.pdf [file DataSheet_1.pdf]
