# Supplementary material for: Impairment of Multiple Mitochondrial Energy Metabolism Pathways in the Heart of Chagas Disease Cardiomyopathy Patients
Source: PubMed Central journal article supplement (PMC8633876; doi:10.3389/fimmu.2021.755782), 2021-11-12
Supplement: Table_2.pdf [file Table_2.pdf]

**Table S2. List of analysed spots by 2D-DIGE and protein identification by mass spectrometry in the myocardium from patients with CCC, IC, DCM and individuals without cardiomyopathies**

| Index | UniProt | Symbol | Protein description                                             | Cellular Component    | Function                                         | Theoretical Values |          | MS Identification |          | CCC / N   |          | IC / N    |          | DCM / N   |          | 1-ANOVA  |
|-------|---------|--------|-----------------------------------------------------------------|-----------------------|--------------------------------------------------|--------------------|----------|-------------------|----------|-----------|----------|-----------|----------|-----------|----------|----------|
|       |         |        |                                                                 |                       |                                                  | pI                 | MW (kDa) | Score             | Peptides | Av. Ratio | T-test   | Av. Ratio | T-test   | Av. Ratio | T-test   |          |
| 1     | Q96BH1  | RNF25  | E3 ubiquitin-protein ligase                                     | Cytoplasm             | 8. Proteasome-Ubiquitin Process                  | 6.10               | 51.22    | 72*               | 7        | 1.6       | 4.50E-03 | 1.02      | 0.821    | 1.53      | 3.79E-05 | 8.86E-06 |
| 2     | P18206  | VINC   | Vinculin (Metavinculin)                                         | Cytoskeleton          | 1. Structural and Contractile Proteins           | 5.51               | 123.67   | 65*               | 9        | 1.42      | 0.0104   | 1.02      | 0.975    | 1.48      | 1.84E-04 | 1.10E-05 |
| 3     | P18206  | VINC   | Vinculin (Metavinculin)                                         | Cytoskeleton          | 1. Structural and Contractile Proteins           | 5.51               | 123.67   | 6.33              | 5        | 1.24      | 0.0546   | -1.05     | 0.541    | 1.3       | 6.98E-03 | 3.40E-04 |
| 4     | NI      | NI     | NI - Spot not identified by MS                                  | NI                    | 10. NI - Spot not identified by MS               | NI                 | NI       | NI                | NI       | 1.04      | 0.591    | -1.18     | 0.0243   | 1.03      | 0.864    | 0.0574   |
| 5     | NP      | NP     | NP - Spot not present in the preparative gel                    | NP                    | 11. NP - Spot not present in the preparative gel | NP                 | NP       | NP                | NP       | 1.5       | 1.54E-03 | 1.2       | 0.122    | 1.46      | 2.59E-03 | 1.52E-03 |
| 6     | NP      | NP     | NP - Spot not present in the preparative gel                    | NP                    | 11. NP - Spot not present in the preparative gel | NP                 | NP       | NP                | NP       | 1.3       | 0.0691   | 1.23      | 0.165    | 1.32      | 0.197    | 0.0557   |
| 7     | P14625  | ENPL   | Endoplasmic precursor (Heat shock protein 90 kDa beta member 1) | Endoplasmic reticulum | 3. Stress Response and Apoptosis                 | 4.73               | 90.18    | 25.86             | 5        | 2.74      | 5.10E-05 | 1.48      | 0.0332   | 2.21      | 1.07E-03 | 3.39E-07 |
| 8     | NI      | NI     | NI - Spot not identified by MS                                  | NI                    | 10. NI - Spot not identified by MS               | NI                 | NI       | NI                | NI       | 1.06      | 0.235    | 1.08      | 0.0242   | 1.22      | 1.66E-03 | 2.48E-03 |
| 9     | NI      | NI     | NI - Spot not identified by MS                                  | NI                    | 10. NI - Spot not identified by MS               | NI                 | NI       | NI                | NI       | 1.02      | 0.666    | 1.05      | 0.314    | 1.17      | 5.02E-03 | 0.0134   |
| 10    | NI      | NI     | NI - Spot not identified by MS                                  | NI                    | 10. NI - Spot not identified by MS               | NI                 | NI       | NI                | NI       | -1.04     | 0.454    | -1.09     | 0.0411   | 1.06      | 0.155    | 0.198    |
| 11    | Q02218  | ODO1   | 2-oxoglutarate dehydrogenase E1 component, mitochondrial        | Mitochondria          | 2.1. Energy Metabolism - Glycolysis              | 6.07               | 111.34   | 10.44             | 10       | -1.04     | 0.47     | -1.07     | 0.199    | 1.06      | 0.295    | 0.531    |
| 12    | Q6WKZ4  | RFIP1  | Rab11 family-interacting protein 1                              | Cytoplasm             | 9. Other Functions                               | 5.32               | 137.20   | 54*               | 6        | 1.07      | 0.552    | -1        | 0.979    | 1.06      | 0.649    | 0.942    |
| 13    | O75112  | LDB3   | LIM domain-binding protein 3                                    | Cytoskeleton          | 1. Structural and Contractile Proteins           | 8.47               | 77.13    | 59*               | 5        | -1.72     | 1.88E-04 | -1.44     | 8.52E-04 | -1.46     | 1.29E-03 | 1.25E-05 |
| 14    | O75112  | LDB3   | LIM domain-binding protein 3                                    | Cytoskeleton          | 1. Structural and Contractile Proteins           | 8.47               | 77.13    | 63*               | 7        | -1.96     | 6.89E-05 | -1.53     | 1.22E-03 | -1.6      | 6.34E-04 | 1.76E-06 |
| 15    | O75112  | LDB3   | LIM domain-binding protein 3                                    | Cytoskeleton          | 1. Structural and Contractile Proteins           | 8.47               | 77.13    | 70*               | 8        | -2.18     | 2.55E-05 | -1.6      | 3.34E-03 | -1.77     | 3.28E-04 | 1.45E-06 |
| 16    | O75112  | LDB3   | LIM domain-binding protein 3                                    | Cytoskeleton          | 1. Structural and Contractile Proteins           | 8.47               | 77.13    | 5.43              | 7        | -2.31     | 8.93E-05 | -1.66     | 6.00E-03 | -1.86     | 7.19E-04 | 3.45E-06 |
| 17    | O75112  | LDB3   | LIM domain-binding protein 3                                    | Cytoskeleton          | 1. Structural and Contractile Proteins           | 8.47               | 77.13    | 56*               | 5        | -1.96     | 3.83E-04 | -1.54     | 7.11E-03 | -1.6      | 1.71E-03 | 5.62E-05 |
| 18    | NP      | NP     | NP - Spot not present in the preparative gel                    | NP                    | 11. NP - Spot not present in the preparative gel | NP                 | NP       | NP                | NP       | 1.07      | 0.796    | -1.2      | 0.127    | 1.03      | 0.939    | 0.0216   |
| 19    | P49588  | SYAC   | Alanyl-tRNA synthetase, cytoplasmic                             | Cytoplasm             | 6. Transcription and Translation Processes       | 5.34               | 106.81   | 53*               | 4        | 1.15      | 0.0678   | 1.15      | 0.172    | 1.02      | 0.847    | 0.114    |
| 20    | NP      | NP     | NP - Spot not present in the preparative gel                    | NP                    | 11. NP - Spot not present in the preparative gel | NP                 | NP       | NP                | NP       | 1.65      | 0.0711   | 1.11      | 0.453    | 1.51      | 0.036    | 0.0269   |
| 21    | P14625  | ENPL   | Endoplasmic precursor (Heat shock protein 90 kDa beta member 1) | Endoplasmic reticulum | 3. Stress Response and Apoptosis                 | 4.73               | 90.18    | 7.06              | 6        | 1.13      | 0.596    | -1.19     | 0.353    | 1.1       | 0.866    | 0.0241   |
| 22    | P29323  | EPHB2  | Ephrin type-B receptor 2                                        | Membrane              | 9. Other Functions                               | 6.00               | 115.63   | 59*               | 7        | 1.51      | 0.126    | -1.04     | 0.927    | 1.43      | 0.0446   | 0.043    |
| 23    | NI      | NI     | NI - Spot not identified by MS                                  | NI                    | 10. NI - Spot not identified by MS               | NI                 | NI       | NI                | NI       | 1.19      | 0.125    | 1.14      | 0.197    | 1.14      | 0.0895   | 0.323    |
| 24    | NP      | NP     | NP - Spot not present in the preparative gel                    | NP                    | 11. NP - Spot not present in the preparative gel | NP                 | NP       | NP                | NP       | 1.46      | 0.372    | -1.13     | 0.581    | 1.28      | 0.284    | 0.0449   |
| 25    | NP      | NP     | NP - Spot not present in the preparative gel                    | NP                    | 11. NP - Spot not present in the preparative gel | NP                 | NP       | NP                | NP       | 1.7       | 0.0466   | 1.09      | 0.717    | 1.45      | 7.78E-03 | 9.75E-04 |
| 26    | Q9UJD0  | RIMS3  | Regulating synaptic Membrane exocytosis protein 3               | Membrane              | 9. Other Functions                               | 9.38               | 32.80    | 53*               | 5        | 1.44      | 0.0117   | 1.21      | 0.166    | 1.15      | 0.165    | 0.0147   |
| 27    | NI      | NI     | NI - Spot not identified by MS                                  | NI                    | 10. NI - Spot not identified by MS               | NI                 | NI       | NI                | NI       | 1.31      | 0.0882   | 1.06      | 0.661    | 1         | 0.877    | 0.261    |
| 28    | Q96GE5  | ZN799  | Zinc finger protein 799                                         | Nucleus               | 6. Transcription and Translation Processes       | 9.29               | 74.29    | 53*               | 6        | 1.03      | 0.879    | 1.13      | 0.259    | 1.79      | 1.21E-03 | 0.0225   |
| 29    | NP      | NP     | NP - Spot not present in the preparative gel                    | NP                    | 11. NP - Spot not present in the preparative gel | NP                 | NP       | NP                | NP       | -1.03     | 0.947    | -1.05     | 0.787    | 1.33      | 0.38     | 0.684    |
| 30    | P35609  | ACTN2  | Alpha-actinin-2 (Alpha actinin skeletal muscle isoform 2)       | Cytoskeleton          | 1. Structural and Contractile Proteins           | 5.31               | 103.85   | 62*               | 7        | -1.15     | 0.207    | 1.07      | 0.623    | 1.08      | 0.797    | 0.528    |
| 31    | P06396  | GELS   | Gelsolin precursor (Actin-depolymerizing factor)                | Cytoskeleton          | 1. Structural and Contractile Proteins           | 5.72               | 82.96    | 40*               | 5        | -1.02     | 0.826    | 1.02      | 0.748    | 1.09      | 0.459    | 0.864    |
| 32    | NI      | NI     | NI - Spot not identified by MS                                  | NI                    | 10. NI - Spot not identified by MS               | NI                 | NI       | NI                | NI       | 1.36      | 0.0264   | 1.15      | 0.127    | 1.29      | 9.71E-03 | 7.53E-04 |
| 33    | P06396  | GELS   | Gelsolin precursor (Actin-depolymerizing factor)                | Cytoskeleton          | 1. Structural and Contractile Proteins           | 5.72               | 82.96    | 7.74              | 4        | 2.16      | 2.31E-04 | 1.28      | 0.0114   | 1.76      | 5.19E-05 | 1.76E-04 |
| 34    | P06396  | GELS   | Gelsolin precursor (Actin-depolymerizing factor)                | Cytoskeleton          | 1. Structural and Contractile Proteins           | 5.72               | 82.96    | 62*               | 9        | 2.35      | 3.10E-04 | 1.42      | 6.37E-03 | 2.01      | 2.46E-05 | 6.76E-05 |
| 35    | Q96N16  | JKIP1  | Janus kinase and microtubule-interacting protein 1              | Membrane              | 9. Other Functions                               | 5.84               | 73.21    | 60*               | 8        | -1.9      | 2.22E-03 | -1.65     | 0.0181   | -1.95     | 2.61E-03 | 4.62E-03 |

|    |        |       |                                                           |              |                                                   |      |        |       |    |       |          |       |          |       |          |          |
|----|--------|-------|-----------------------------------------------------------|--------------|---------------------------------------------------|------|--------|-------|----|-------|----------|-------|----------|-------|----------|----------|
| 36 | NI     | NI    | NI - Spot not identified by MS                            | NI           | 10. NI - Spot not identified by MS                | NI   | NI     | NI    | NI | 1.55  | 3.30E-03 | 1.16  | 0.0595   | 1.4   | 6.43E-05 | 6.35E-05 |
| 37 | P06396 | GELS  | Gelsolin precursor (Actin-depolymerizing factor)          | Cytoskeleton | 1. Structural and Contractile Proteins            | 5.72 | 82.96  | 10.29 | 8  | 1.63  | 2.62E-03 | 1.13  | 0.08     | 1.48  | 3.04E-07 | 5.39E-06 |
| 38 | P06396 | GELS  | Gelsolin precursor (Actin-depolymerizing factor)          | Cytoskeleton | 1. Structural and Contractile Proteins            | 5.72 | 82.96  | 26.39 | 7  | 1.85  | 5.99E-04 | 1.21  | 0.0698   | 1.62  | 1.50E-06 | 4.86E-06 |
| 39 | P06396 | GELS  | Gelsolin precursor (Actin-depolymerizing factor)          | Cytoskeleton | 1. Structural and Contractile Proteins            | 5.72 | 82.96  | 26.39 | 7  | 1.74  | 1.04E-03 | 1.1   | 0.335    | 1.54  | 4.16E-05 | 3.45E-05 |
| 40 | P21980 | TGM2  | Protein-glutamine gamma-glutamyltransferase 2             | Cytoplasm    | 2.6. Other Metabolic Processes                    | 5.11 | 77.20  | 9.19  | 8  | 2.2   | 1.36E-03 | 1.27  | 0.0176   | 2.27  | 8.87E-08 | 4.55E-09 |
| 41 | NI     | NI    | NI - Spot not identified by MS                            | NI           | 10. NI - Spot not identified by MS                | NI   | NI     | NI    | NI | -1.12 | 0.294    | -1.31 | 0.0936   | 1.37  | 0.775    | 0.274    |
| 42 | NP     | NP    | NP - Spot not present in the preparative gel              | NP           | 11. NP - Spot not present in the preparative gel  | NP   | NP     | NP    | NP | -1.33 | 0.0195   | -1.05 | 0.798    | -1.23 | 0.0723   | 0.0126   |
| 43 | NI     | NI    | NI - Spot not identified by MS                            | NI           | 10. NI - Spot not identified by MS                | NI   | NI     | NI    | NI | -1.03 | 0.548    | -1.04 | 0.472    | 1.01  | 0.944    | 0.998    |
| 44 | P21980 | TGM2  | Protein-glutamine gamma-glutamyltransferase 2             | Cytoplasm    | 2.6. Other Metabolic Processes                    | 5.11 | 77.20  | 11.07 | 6  | 2.41  | 2.58E-03 | 1.29  | 2.93E-03 | 2.3   | 4.18E-09 | 3.58E-09 |
| 45 | NP     | NP    | NP - Spot not present in the preparative gel              | NP           | 11. NP - Spot not present in the preparative gel  | NP   | NP     | NP    | NP | 1.15  | 0.0387   | 1.22  | 5.46E-03 | 1.17  | 0.0218   | 0.0963   |
| 46 | Q99798 | ACON  | Aconitate hydratase, mitochondrial (Aconitase)            | Mitochondria | 2.3. Energy Metabolism - Tricarboxylic Acid Cycle | 6.85 | 82.43  | 8.74  | 5  | -1.07 | 0.393    | 1.05  | 0.335    | -1.01 | 0.915    | 0.723    |
| 47 | Q99798 | ACON  | Aconitate hydratase, mitochondrial (Aconitase)            | Mitochondria | 2.3. Energy Metabolism - Tricarboxylic Acid Cycle | 6.85 | 82.43  | 34.41 | 5  | 1.01  | 0.975    | 1.15  | 0.025    | 1.04  | 0.417    | 0.0526   |
| 48 | Q99798 | ACON  | Aconitate hydratase, mitochondrial (Aconitase)            | Mitochondria | 2.3. Energy Metabolism - Tricarboxylic Acid Cycle | 6.85 | 82.43  | 7.51  | 4  | -1.19 | 0.0482   | 1.1   | 0.177    | -1.08 | 0.308    | 0.122    |
| 49 | NP     | NP    | NP - Spot not present in the preparative gel              | NP           | 11. NP - Spot not present in the preparative gel  | NP   | NP     | NP    | NP | -1.61 | 7.47E-04 | -1.25 | 0.0351   | -1.48 | 2.52E-03 | 1.79E-03 |
| 50 | P21980 | TGM2  | Protein-glutamine gamma-glutamyltransferase 2             | Cytoplasm    | 2.6. Other Metabolic Processes                    | 5.11 | 77.20  | 11.86 | 12 | 2.39  | 3.04E-03 | 1.24  | 0.0141   | 2.26  | 2.25E-08 | 2.35E-09 |
| 51 | NP     | NP    | NP - Spot not present in the preparative gel              | NP           | 11. NP - Spot not present in the preparative gel  | NP   | NP     | NP    | NP | -1.21 | 0.0819   | -1.34 | 0.0417   | 1.16  | 0.976    | 0.209    |
| 52 | NP     | NP    | NP - Spot not present in the preparative gel              | NP           | 11. NP - Spot not present in the preparative gel  | NP   | NP     | NP    | NP | 1.48  | 1.42E-05 | 1.32  | 4.57E-04 | 1.45  | 5.71E-06 | 8.59E-07 |
| 53 | NP     | NP    | NP - Spot not present in the preparative gel              | NP           | 11. NP - Spot not present in the preparative gel  | NP   | NP     | NP    | NP | 1.35  | 1.45E-03 | 1.29  | 1.20E-03 | 1.37  | 5.13E-05 | 6.25E-05 |
| 54 | NP     | NP    | NP - Spot not present in the preparative gel              | NP           | 11. NP - Spot not present in the preparative gel  | NP   | NP     | NP    | NP | 1.44  | 1.47E-04 | 1.4   | 8.26E-05 | 1.45  | 5.91E-06 | 3.20E-06 |
| 55 | NP     | NP    | NP - Spot not present in the preparative gel              | NP           | 11. NP - Spot not present in the preparative gel  | NP   | NP     | NP    | NP | 1.25  | 0.0179   | 1.22  | 0.0281   | 1.25  | 4.90E-03 | 8.80E-03 |
| 56 | Q99798 | ACON  | Aconitate hydratase, mitochondrial (Aconitase)            | Mitochondria | 2.3. Energy Metabolism - Tricarboxylic Acid Cycle | 6.85 | 82.43  | 8.08  | 7  | -1.04 | 0.535    | 1.09  | 0.159    | -1.03 | 0.53     | 0.0904   |
| 57 | Q99798 | ACON  | Aconitate hydratase, mitochondrial (Aconitase)            | Mitochondria | 2.3. Energy Metabolism - Tricarboxylic Acid Cycle | 6.85 | 82.43  | 11.26 | 14 | -1.01 | 0.747    | 1.17  | 3.91E-03 | 1.02  | 0.506    | 0.0181   |
| 58 | P35609 | ACTN2 | Alpha-actinin-2 (Alpha actinin skeletal muscle isoform 2) | Cytoskeleton | 1. Structural and Contractile Proteins            | 5.31 | 103.85 | 76    | 8  | -1.74 | 4.51E-03 | -1.76 | 5.82E-03 | -1.35 | 0.0927   | 0.0134   |
| 59 | Q99798 | ACON  | Aconitate hydratase, mitochondrial (Aconitase)            | Mitochondria | 2.3. Energy Metabolism - Tricarboxylic Acid Cycle | 6.85 | 82.43  | 8.84  | 5  | -1.04 | 0.38     | 1.16  | 1.24E-03 | 1.02  | 0.434    | 0.0213   |
| 60 | P49674 | KC1E  | Casein kinase I isoform epsilon                           | Cytoplasm    | 5. Cell Signaling                                 | 9.68 | 47.32  | 56*   | 5  | -1.56 | 4.53E-04 | -1.23 | 0.0448   | -1.43 | 5.37E-04 | 6.74E-03 |
| 61 | NP     | NP    | NP - Spot not present in the preparative gel              | NP           | 11. NP - Spot not present in the preparative gel  | NP   | NP     | NP    | NP | -1.4  | 2.86E-03 | -1.13 | 0.227    | -1.41 | 5.19E-03 | 4.90E-03 |
| 62 | NP     | NP    | NP - Spot not present in the preparative gel              | NP           | 11. NP - Spot not present in the preparative gel  | NP   | NP     | NP    | NP | 1.34  | 7.77E-06 | 1.2   | 2.67E-05 | 1.34  | 7.26E-07 | 2.01E-06 |
| 63 | Q99798 | ACON  | Aconitate hydratase, mitochondrial (Aconitase)            | Mitochondria | 2.3. Energy Metabolism - Tricarboxylic Acid Cycle | 6.85 | 82.43  | 13.06 | 23 | -1.05 | 0.337    | 1.17  | 4.15E-03 | 1.01  | 0.723    | 0.053    |
| 64 | P29400 | CO4A5 | Collagen alpha-5(IV) chain                                | Cytoskeleton | 1. Structural and Contractile Proteins            | 7.53 | 158.35 | 51*   | 6  | 1.03  | 0.608    | -1.04 | 0.75     | -1.02 | 0.934    | 0.955    |
| 65 | Q8WVW8 | GAB3  | GRB2-associated-binding protein 3                         | Cytoplasm    | 9. Other Functions                                | 6.80 | 65.59  | 58*   | 4  | -1.33 | 6.97E-03 | -1.26 | 0.0167   | -1.44 | 4.13E-03 | 0.0437   |
| 66 | NP     | NP    | NP - Spot not present in the preparative gel              | NP           | 11. NP - Spot not present in the preparative gel  | NP   | NP     | NP    | NP | 2.27  | 4.54E-03 | 1.45  | 0.0947   | 1.64  | 0.0196   | 2.76E-03 |
| 67 | Q99798 | ACON  | Aconitate hydratase, mitochondrial (Aconitase)            | Mitochondria | 2.3. Energy Metabolism - Tricarboxylic Acid Cycle | 6.85 | 82.43  | 14.69 | 21 | -1.08 | 0.194    | 1.14  | 0.0361   | -1    | 0.905    | 0.151    |
| 68 | Q16891 | IMMT  | Mitochondrial inner Membrane protein (Mitofilin)          | Mitochondria | 9. Other Functions                                | 6.08 | 83.68  | 16.4  | 5  | 1.29  | 1.61E-05 | 1.16  | 5.52E-04 | 1.28  | 4.87E-06 | 6.90E-06 |
| 69 | P13010 | KU86  | ATP-dependent DNA helicase 2 subunit 2                    | Nucleus      | 2.6. Other Metabolic Processes                    | 5.55 | 82.57  | 57*   | 4  | -1.53 | 2.21E-04 | -1.18 | 0.0591   | -1.52 | 2.83E-05 | 8.16E-07 |
| 70 | P08237 | K6PF  | 6-phosphofructokinase, muscle type                        | Cytoplasm    | 2.1. Energy Metabolism - Glycolysis               | 8.23 | 85.05  | 72*   | 6  | -1.27 | 3.02E-03 | -1.09 | 0.101    | -1.25 | 6.87E-04 | 4.85E-04 |
| 71 | Q9H223 | EHD4  | EH domain-containing protein 4                            | Membrane     | 9. Other Functions                                | 6.33 | 61.18  | 53*   | 5  | -1.44 | 1.16E-05 | -1.14 | 0.0982   | -1.45 | 6.04E-07 | 2.98E-08 |
| 72 | P08237 | K6PF  | 6-phosphofructokinase, muscle type                        | Cytoplasm    | 2.1. Energy Metabolism - Glycolysis               | 8.23 | 85.05  | 60*   | 4  | -1.09 | 0.268    | -1.24 | 0.0506   | -1.23 | 0.0255   | 0.253    |

|     |        |       |                                                                 |                       |                                                                           |      |        |       |    |       |          |       |          |       |          |          |
|-----|--------|-------|-----------------------------------------------------------------|-----------------------|---------------------------------------------------------------------------|------|--------|-------|----|-------|----------|-------|----------|-------|----------|----------|
| 73  | Q16891 | IMMT  | Mitochondrial inner Membrane protein (Mitofilin)                | Mitochondria          | 9. Other Functions                                                        | 6.08 | 83.68  | 32.39 | 8  | 1.3   | 4.47E-05 | 1.18  | 8.89E-04 | 1.3   | 1.43E-05 | 8.89E-06 |
| 74  | Q5TYW1 | ZN658 | Zinc finger protein 658                                         | Nucleus               | 6. Transcription and Translation Processes                                | 8.63 | 122.27 | 57*   | 11 | 1.59  | 6.39E-04 | 1.31  | 0.0166   | 1.53  | 1.54E-04 | 2.13E-04 |
| 75  | Q6ZNA5 | FRRS1 | Ferric-chelate reductase 1                                      | Membrane              | 7. Transport and Transmembrane Transport                                  | 7.16 | 63.81  | 52*   | 6  | 1.69  | 8.20E-06 | 1.59  | 3.19E-04 | 1.84  | 4.31E-08 | 3.05E-07 |
| 76  | Q16891 | IMMT  | Mitochondrial inner Membrane protein (Mitofilin)                | Mitochondria          | 9. Other Functions                                                        | 6.08 | 83.68  | 6.49  | 7  | 1.3   | 3.59E-03 | 1.29  | 0.0144   | 1.41  | 5.32E-05 | 4.81E-04 |
| 77  | P02787 | TRFE  | Serotransferrin precursor (Transferrin)                         | Secreted              | 9. Other Functions                                                        | 6.70 | 75.20  | 6.52  | 8  | 2.84  | 1.01E-04 | 1.82  | 7.18E-03 | 2.6   | 1.74E-04 | 8.64E-06 |
| 78  | P02787 | TRFE  | Serotransferrin precursor (Transferrin)                         | Secreted              | 9. Other Functions                                                        | 6.70 | 75.20  | 9.35  | 9  | 2.69  | 5.59E-04 | 1.93  | 3.08E-03 | 2.23  | 2.40E-04 | 1.15E-03 |
| 79  | Q16891 | IMMT  | Mitochondrial inner Membrane protein (Mitofilin)                | Mitochondria          | 9. Other Functions                                                        | 6.08 | 83.68  | 6.16  | 9  | 1.26  | 0.0466   | 1.02  | 0.767    | 1.23  | 0.131    | 0.151    |
| 80  | Q9H115 | SNAB  | Beta-soluble NSF attachment protein                             | Membrane              | 7. Transport and Transmembrane Transport                                  | 5.32 | 33.56  | 56*   | 5  | 2.93  | 7.08E-05 | 1.84  | 8.29E-03 | 2.55  | 9.47E-05 | 7.67E-06 |
| 81  | P02787 | TRFE  | Serotransferrin precursor (Transferrin)                         | Secreted              | 9. Other Functions                                                        | 6.70 | 75.20  | 11.59 | 10 | 1.66  | 0.0174   | 1.2   | 0.335    | 1.53  | 0.0302   | 0.0933   |
| 82  | P02787 | TRFE  | Serotransferrin precursor (Transferrin)                         | Secreted              | 9. Other Functions                                                        | 6.70 | 75.20  | 13.68 | 14 | 3.46  | 1.79E-04 | 2.35  | 4.03E-03 | 3.17  | 1.83E-05 | 1.88E-05 |
| 83  | NP     | NP    | NP - Spot not present in the preparative gel                    | NP                    | 11. NP - Spot not present in the preparative gel                          | NP   | NP     | NP    | NP | 2.31  | 1.39E-03 | 1.16  | 0.553    | 1.68  | 0.0453   | 1.02E-03 |
| 84  | P28331 | NDUS1 | NADH-ubiquinone oxidoreductase 75 kDa subunit, mitochondrial    | Mitochondria          | 2.4. Energy Metabolism - Oxidative Phosphorylation and Electron Transport | 5.42 | 76.98  | 26.47 | 7  | -1.2  | 0.0925   | -1.11 | 0.187    | -1.21 | 0.0522   | 0.0836   |
| 85  | P28331 | NDUS1 | NADH-ubiquinone oxidoreductase 75 kDa subunit, mitochondrial    | Mitochondria          | 2.4. Energy Metabolism - Oxidative Phosphorylation and Electron Transport | 5.42 | 76.98  | 13.93 | 7  | -1.25 | 2.81E-03 | -1.02 | 0.662    | -1.15 | 0.0789   | 0.013    |
| 86  | P28331 | NDUS1 | NADH-ubiquinone oxidoreductase 75 kDa subunit, mitochondrial    | Mitochondria          | 2.4. Energy Metabolism - Oxidative Phosphorylation and Electron Transport | 5.42 | 76.98  | 44.12 | 10 | -1.25 | 1.81E-03 | -1.01 | 0.94     | -1.18 | 0.0183   | 0.021    |
| 87  | P11021 | GRP78 | 78 kDa glucose-regulated protein (Heat shock 70 kDa protein 5)  | Endoplasmic reticulum | 3. Stress Response and Apoptosis                                          | 5.01 | 70.48  | 14.69 | 16 | 1.64  | 1.62E-04 | 1.1   | 0.47     | 1.64  | 1.11E-03 | 4.95E-06 |
| 88  | P29597 | TYK2  | Non-receptor tyrosine-protein kinase TYK2                       | Cytoplasm             | 5. Cell Signaling                                                         | 6.71 | 133.65 | 56*   | 7  | -1.15 | 0.226    | -1.19 | 0.128    | -1.07 | 0.573    | 0.595    |
| 89  | P11021 | GRP78 | 78 kDa glucose-regulated protein (Heat shock 70 kDa protein 5)  | Endoplasmic reticulum | 3. Stress Response and Apoptosis                                          | 5.01 | 70.48  | 43.5  | 14 | 2     | 1.62E-05 | 1.23  | 0.134    | 1.94  | 9.52E-05 | 2.32E-07 |
| 90  | NI     | NI    | NI - Spot not identified by MS                                  | NI                    | 10. NI - Spot not identified by MS                                        | NI   | NI     | NI    | NI | 1.28  | 0.171    | -1.06 | 0.59     | 1.2   | 0.0371   | 3.92E-03 |
| 91  | P12883 | MYH7  | Myosin-7 (Myosin heavy chain, cardiac muscle beta isoform)      | Cytoskeleton          | 1. Structural and Contractile Proteins                                    | 5.63 | 223.10 | 6.64  | 8  | -2.2  | 6.88E-03 | -2.56 | 3.34E-03 | -2.76 | 1.73E-03 | 6.56E-05 |
| 92  | NP     | NP    | NP - Spot not present in the preparative gel                    | NP                    | 11. NP - Spot not present in the preparative gel                          | NP   | NP     | NP    | NP | -1.02 | 0.862    | -1.03 | 0.735    | 1     | 0.991    | 6.33E-04 |
| 93  | NP     | NP    | NP - Spot not present in the preparative gel                    | NP                    | 11. NP - Spot not present in the preparative gel                          | NP   | NP     | NP    | NP | -1.86 | 0.0116   | -2.13 | 6.96E-03 | -2.25 | 3.84E-03 | 5.78E-05 |
| 94  | P40939 | ECHA  | Trifunctional enzyme subunit alpha, mitochondrial               | Mitochondria          | 2.2. Energy Metabolism - Lipid Metabolism/ $\beta$ -Oxidation             | 8.98 | 79.01  | 9.07  | 8  | -1.11 | 0.319    | 1.17  | 0.245    | 1.05  | 0.693    | 0.208    |
| 95  | Q96MP8 | KCTD7 | BTB/POZ domain-containing protein KCTD7                         | Cytoplasm             | 7. Transport and Transmembrane Transport                                  | 5.58 | 33.13  | 57*   | 4  | -1.29 | 0.0223   | -1.2  | 0.0922   | -1.22 | 0.0917   | 1.24E-03 |
| 96  | NP     | NP    | NP - Spot not present in the preparative gel                    | NP                    | 11. NP - Spot not present in the preparative gel                          | NP   | NP     | NP    | NP | -1.13 | 0.239    | -1    | 0.917    | -1.16 | 0.195    | 0.301    |
| 97  | Q5T5P2 | SKT   | Sickle tail protein homolog                                     | Cytoplasm             | 9. Other Functions                                                        | 6.59 | 214.12 | 53*   | 11 | -1.32 | 9.70E-03 | -1.26 | 0.0317   | -1.23 | 0.0286   | 0.0435   |
| 98  | P38646 | GRP75 | Stress-70 protein, mitochondrial                                | Mitochondria          | 3. Stress Response and Apoptosis                                          | 5.44 | 68.76  | 12.3  | 14 | 1.65  | 4.56E-05 | 1.53  | 5.14E-06 | 1.68  | 2.63E-05 | 7.92E-06 |
| 99  | NP     | NP    | NP - Spot not present in the preparative gel                    | NP                    | 11. NP - Spot not present in the preparative gel                          | NP   | NP     | NP    | NP | 2.03  | 7.27E-03 | 1.36  | 0.253    | 2.14  | 9.76E-03 | 0.0253   |
| 100 | NI     | NI    | NI - Spot not identified by MS                                  | NI                    | 10. NI - Spot not identified by MS                                        | NI   | NI     | NI    | NI | 2.21  | 2.02E-04 | 1.54  | 9.00E-03 | 1.94  | 1.90E-04 | 4.30E-04 |
| 101 | P51884 | LUM   | Lumican precursor                                               | Cytoskeleton          | 1. Structural and Contractile Proteins                                    | 6.17 | 36.66  | 27    | 4  | 2.68  | 1.04E-04 | 1.92  | 1.97E-03 | 2.3   | 4.83E-04 | 1.54E-03 |
| 102 | P17661 | DESM  | Desmin                                                          | Cytoplasm             | 1. Structural and Contractile Proteins                                    | 5.21 | 53.40  | 6.04  | 11 | 1.82  | 9.20E-04 | 1.25  | 0.177    | 1.8   | 2.28E-04 | 1.03E-03 |
| 103 | P38646 | GRP75 | Stress-70 protein, mitochondrial                                | Mitochondria          | 3. Stress Response and Apoptosis                                          | 5.44 | 68.76  | 76*   | 12 | 1.68  | 4.52E-04 | 1.5   | 2.41E-04 | 1.62  | 2.48E-04 | 6.74E-05 |
| 104 | NI     | NI    | NI - Spot not identified by MS                                  | NI                    | 10. NI - Spot not identified by MS                                        | NI   | NI     | NI    | NI | 2.62  | 9.89E-05 | 1.57  | 0.016    | 2.13  | 1.00E-03 | 1.01E-03 |
| 105 | P01024 | CO3   | Complement C3 precursor                                         | Secreted              | 4. Immune Response                                                        | 6.00 | 184.95 | 57*   | 6  | 2.44  | 6.58E-06 | 1.65  | 7.74E-03 | 2.25  | 5.37E-04 | 2.75E-04 |
| 106 | P17661 | DESM  | Desmin                                                          | Cytoplasm             | 1. Structural and Contractile Proteins                                    | 5.21 | 53.40  | 9.69  | 8  | 1.31  | 0.0325   | 1.07  | 0.535    | 1.32  | 0.0221   | 0.109    |
| 107 | P11142 | HSP7C | Heat shock cognate 71 kDa protein (Heat shock 70 kDa protein 8) | Cytoplasm             | 3. Stress Response and Apoptosis                                          | 5.37 | 70.77  | 34.98 | 14 | 1.25  | 0.0153   | 1.16  | 0.0208   | 1.26  | 2.29E-03 | 3.50E-03 |
| 108 | NP     | NP    | NP - Spot not present in the preparative gel                    | NP                    | 11. NP - Spot not present in the preparative gel                          | NP   | NP     | NP    | NP | 1.24  | 0.0446   | 1.05  | 0.606    | 1.12  | 0.222    | 0.335    |
| 109 | P11142 | HSP7C | Heat shock cognate 71 kDa protein (Heat shock 70 kDa protein 8) | Cytoplasm             | 3. Stress Response and Apoptosis                                          | 5.37 | 70.77  | 10.6  | 10 | 1.2   | 0.0557   | 1.13  | 0.0928   | 1.21  | 8.89E-03 | 5.14E-03 |

|     |        |        |                                                                          |                       |                                                                           |      |        |       |    |       |          |       |          |       |          |          |
|-----|--------|--------|--------------------------------------------------------------------------|-----------------------|---------------------------------------------------------------------------|------|--------|-------|----|-------|----------|-------|----------|-------|----------|----------|
| 110 | P02768 | ALBU   | Serum albumin precursor                                                  | Secreted              | 9. Other Functions                                                        | 5.67 | 66.47  | 7.09  | 8  | 2.46  | 1.34E-04 | 1.59  | 0.0124   | 1.96  | 1.03E-04 | 3.43E-04 |
| 111 | NP     | NP     | NP - Spot not present in the preparative gel                             | NP                    | 11. NP - Spot not present in the preparative gel                          | NP   | NP     | NP    | NP | 2.79  | 2.36E-04 | 2.04  | 3.33E-03 | 2.28  | 4.50E-04 | 2.64E-05 |
| 112 | NP     | NP     | NP - Spot not present in the preparative gel                             | NP                    | 11. NP - Spot not present in the preparative gel                          | NP   | NP     | NP    | NP | 2.22  | 5.92E-04 | 1.51  | 0.0375   | 1.81  | 5.91E-04 | 2.19E-03 |
| 113 | NP     | NP     | NP - Spot not present in the preparative gel                             | NP                    | 11. NP - Spot not present in the preparative gel                          | NP   | NP     | NP    | NP | 2.19  | 4.39E-04 | 1.48  | 0.0503   | 1.72  | 1.64E-03 | 2.88E-03 |
| 114 | NP     | NP     | NP - Spot not present in the preparative gel                             | NP                    | 11. NP - Spot not present in the preparative gel                          | NP   | NP     | NP    | NP | 2.29  | 3.59E-05 | 1.87  | 3.21E-03 | 1.88  | 1.83E-04 | 8.69E-05 |
| 115 | P02768 | ALBU   | Serum albumin precursor                                                  | Secreted              | 9. Other Functions                                                        | 5.67 | 66.47  | 12.96 | 12 | 2.45  | 8.20E-05 | 1.92  | 3.43E-03 | 2.01  | 2.64E-04 | 4.87E-05 |
| 116 | NP     | NP     | NP - Spot not present in the preparative gel                             | NP                    | 11. NP - Spot not present in the preparative gel                          | NP   | NP     | NP    | NP | 2.47  | 1.35E-04 | 1.8   | 6.03E-03 | 1.96  | 3.74E-04 | 1.94E-05 |
| 117 | P02768 | ALBU   | Serum albumin precursor                                                  | Secreted              | 9. Other Functions                                                        | 5.67 | 66.47  | 12.32 | 13 | 2.48  | 2.56E-04 | 2.29  | 2.27E-03 | 2.03  | 9.03E-04 | 3.63E-04 |
| 118 | P31040 | DHSA   | Succinate dehydrogenase [ubiquinone] flavoprotein subunit, mitochondrial | Mitochondria          | 2.4. Energy Metabolism - Oxidative Phosphorylation and Electron Transport | 6.25 | 68.01  | 8.47  | 10 | 2.3   | 1.63E-04 | 2.07  | 3.55E-03 | 1.96  | 4.69E-04 | 2.23E-04 |
| 119 | P31040 | DHSA   | Succinate dehydrogenase [ubiquinone] flavoprotein subunit, mitochondrial | Mitochondria          | 2.4. Energy Metabolism - Oxidative Phosphorylation and Electron Transport | 6.25 | 68.01  | 7.3   | 8  | 2.3   | 3.95E-04 | 1.94  | 5.51E-03 | 1.83  | 1.70E-03 | 5.79E-04 |
| 120 | NI     | NI     | NI - Spot not identified by MS                                           | NI                    | 10. NI - Spot not identified by MS                                        | NI   | NI     | NI    | NI | -1.05 | 0.591    | 1.02  | 0.716    | -1.01 | 0.966    | 0.672    |
| 121 | O95831 | AIFM1  | Apoptosis-inducing factor 1, mitochondrial                               | Nucleus               | 3. Stress Response and Apoptosis                                          | 6.86 | 55.81  | 58*   | 7  | 1.03  | 0.512    | 1.09  | 0.148    | 1.06  | 0.318    | 0.499    |
| 122 | NP     | NP     | NP - Spot not present in the preparative gel                             | NP                    | 11. NP - Spot not present in the preparative gel                          | NP   | NP     | NP    | NP | 1.24  | 0.0322   | 1.1   | 0.235    | 1.25  | 0.0301   | 0.151    |
| 123 | P08107 | HSP71  | Heat shock 70 kDa protein 1                                              | Endoplasmic reticulum | 3. Stress Response and Apoptosis                                          | 5.48 | 69.92  | 14.8  | 15 | 1.45  | 4.11E-03 | 1.31  | 0.0186   | 1.4   | 3.04E-03 | 3.72E-03 |
| 124 | P00488 | F13A   | Coagulation factor XIII A chain                                          | Cytoplasm             | 9. Other Functions                                                        | 5.81 | 79.24  | 56*   | 8  | 1.41  | 9.68E-03 | 1.09  | 0.413    | 1.41  | 4.90E-03 | 6.12E-03 |
| 125 | P08107 | HSP71  | Heat shock 70 kDa protein 1                                              | Endoplasmic reticulum | 3. Stress Response and Apoptosis                                          | 5.48 | 69.92  | 14.96 | 20 | 1.41  | 0.0119   | 1.28  | 0.0243   | 1.38  | 4.85E-03 | 2.00E-03 |
| 126 | NI     | NI     | NI - Spot not identified by MS                                           | NI                    | 10. NI - Spot not identified by MS                                        | NI   | NI     | NI    | NI | 1.05  | 0.641    | -1.4  | 0.0851   | 1.58  | 0.0207   | 0.0706   |
| 127 | NP     | NP     | NP - Spot not present in the preparative gel                             | NP                    | 11. NP - Spot not present in the preparative gel                          | NP   | NP     | NP    | NP | 1.63  | 0.0256   | 1.11  | 0.538    | 1.34  | 0.242    | 0.0746   |
| 128 | P31040 | DHSA   | Succinate dehydrogenase [ubiquinone] flavoprotein subunit, mitochondrial | Mitochondria          | 2.4. Energy Metabolism - Oxidative Phosphorylation and Electron Transport | 6.25 | 68.01  | 15.94 | 14 | 1.02  | 1        | 1.29  | 0.0143   | 1.02  | 0.757    | 0.0638   |
| 129 | P31040 | DHSA   | Succinate dehydrogenase [ubiquinone] flavoprotein subunit, mitochondrial | Mitochondria          | 2.4. Energy Metabolism - Oxidative Phosphorylation and Electron Transport | 6.25 | 68.01  | 14.98 | 14 | -1    | 0.874    | 1.22  | 0.0148   | -1    | 0.961    | 0.0425   |
| 130 | NP     | NP     | NP - Spot not present in the preparative gel                             | NP                    | 11. NP - Spot not present in the preparative gel                          | NP   | NP     | NP    | NP | 1.7   | 0.0144   | 1.1   | 0.696    | 1.62  | 0.0417   | 0.0126   |
| 131 | P12883 | MYH7   | Myosin-7 (Myosin heavy chain, cardiac muscle beta isoform)               | Cytoskeleton          | 1. Structural and Contractile Proteins                                    | 5.63 | 223.10 | 61*   | 9  | -1.71 | 0.0877   | -1.8  | 0.063    | -2.01 | 0.0204   | 1.22E-03 |
| 132 | NP     | NP     | NP - Spot not present in the preparative gel                             | NP                    | 11. NP - Spot not present in the preparative gel                          | NP   | NP     | NP    | NP | 1.15  | 0.298    | 1.03  | 0.762    | 1.05  | 0.441    | 0.489    |
| 133 | NI     | NI     | NI - Spot not identified by MS                                           | NI                    | 10. NI - Spot not identified by MS                                        | NI   | NI     | NI    | NI | 1.14  | 0.0122   | 1.05  | 0.248    | 1.07  | 0.247    | 0.0325   |
| 134 | Q9H6S0 | YTDC2  | Probable ATP-dependent RNA helicase YTHDC2                               | Nucleus               | 2.6. Other Metabolic Processes                                            | 8.68 | 160.25 | 59*   | 6  | -1.02 | 0.821    | 1.01  | 0.766    | 1.02  | 0.77     | 8.42E-04 |
| 135 | NP     | NP     | NP - Spot not present in the preparative gel                             | NP                    | 11. NP - Spot not present in the preparative gel                          | NP   | NP     | NP    | NP | 1.29  | 8.16E-03 | 1.05  | 0.757    | 1.21  | 3.01E-03 | 8.44E-03 |
| 136 | P49748 | ACADVL | Very long-chain specific acyl-CoA dehydrogenase, mitochondrial           | Mitochondria          | 2.2. Energy Metabolism - Lipid Metabolism/ $\beta$ -Oxidation             | 7.74 | 66.18  | 9.14  | 7  | -1.52 | 3.16E-03 | 1.08  | 0.29     | -1.15 | 0.198    | 2.33E-03 |
| 137 | P49748 | ACADVL | Very long-chain specific acyl-CoA dehydrogenase, mitochondrial           | Mitochondria          | 2.2. Energy Metabolism - Lipid Metabolism/ $\beta$ -Oxidation             | 7.74 | 66.18  | 14.69 | 13 | -1.51 | 3.06E-03 | -1.05 | 0.483    | -1.22 | 0.0741   | 2.02E-03 |
| 138 | NP     | NP     | NP - Spot not present in the preparative gel                             | NP                    | 11. NP - Spot not present in the preparative gel                          | NP   | NP     | NP    | NP | 1.06  | 0.593    | -1.09 | 0.2      | 1.13  | 0.0467   | 0.0198   |
| 139 | NP     | NP     | NP - Spot not present in the preparative gel                             | NP                    | 11. NP - Spot not present in the preparative gel                          | NP   | NP     | NP    | NP | 1     | 0.818    | 1.21  | 0.177    | 1.09  | 0.593    | 0.56     |
| 140 | P42345 | FRAP   | Serine/threonine-protein kinase mTOR                                     | Endoplasmic reticulum | 5. Cell Signaling                                                         | 6.73 | 288.89 | 60*   | 12 | -1.39 | 0.0542   | -1.38 | 0.0498   | -1.1  | 0.506    | 0.0461   |
| 141 | P49748 | ACADVL | Very long-chain specific acyl-CoA dehydrogenase, mitochondrial           | Mitochondria          | 2.2. Energy Metabolism - Lipid Metabolism/ $\beta$ -Oxidation             | 7.74 | 66.18  | 26.47 | 12 | -1.11 | 0.296    | -1.05 | 0.657    | 1.02  | 0.988    | 2.81E-04 |
| 142 | Q16555 | DPYL2  | Dihydropyrimidinase-related protein 2                                    | Cytoplasm             | 2.6. Other Metabolic Processes                                            | 5.95 | 62.29  | 11.43 | 9  | 1.35  | 5.67E-03 | 1.12  | 0.0582   | 1.35  | 2.26E-05 | 5.06E-05 |
| 143 | Q92736 | RYR2   | Ryanodine receptor 2                                                     | Membrane              | 7. Transport and Transmembrane Transport                                  | 5.73 | 564.57 | 65*   | 9  | -1.07 | 0.484    | -1.12 | 0.279    | -1.06 | 0.573    | 0.272    |
| 144 | NI     | NI     | NI - Spot not identified by MS                                           | NI                    | 10. NI - Spot not identified by MS                                        | NI   | NI     | NI    | NI | -1.1  | 0.297    | 1     | 0.946    | 1.03  | 0.96     | 4.89E-04 |
| 145 | P49748 | ACADVL | Very long-chain specific acyl-CoA dehydrogenase, mitochondrial           | Mitochondria          | 2.2. Energy Metabolism - Lipid Metabolism/ $\beta$ -Oxidation             | 7.74 | 66.18  | 13.18 | 10 | -1.36 | 5.96E-03 | 1.04  | 0.56     | -1.04 | 0.635    | 7.89E-04 |
| 146 | P49748 | ACADVL | Very long-chain specific acyl-CoA dehydrogenase, mitochondrial           | Mitochondria          | 2.2. Energy Metabolism - Lipid Metabolism/ $\beta$ -Oxidation             | 7.74 | 66.18  | 202*  | 14 | -1.23 | 0.0436   | -1.01 | 0.976    | -1.06 | 0.521    | 6.57E-04 |

|     |        |       |                                                                         |                       |                                                                           |      |        |       |    |       |          |       |          |       |          |          |
|-----|--------|-------|-------------------------------------------------------------------------|-----------------------|---------------------------------------------------------------------------|------|--------|-------|----|-------|----------|-------|----------|-------|----------|----------|
| 147 | Q0VD86 | INCA1 | Protein INCA1                                                           | Nucleus               | 9. Other Functions                                                        | 6.92 | 26.82  | 50*   | 8  | -1.59 | 0.064    | -1.76 | 0.0256   | -1.54 | 0.071    | 0.0118   |
| 148 | Q16134 | ETFD  | Electron transfer flavoprotein-ubiquinone oxidoreductase, mitochondrial | Mitochondria          | 2.4. Energy Metabolism - Oxidative Phosphorylation and Electron Transport | 6.52 | 64.68  | 50*   | 4  | 1.02  | 0.669    | 1.1   | 0.144    | 1.04  | 0.545    | 0.0623   |
| 149 | NP     | NP    | NP - Spot not present in the preparative gel                            | NP                    | 11. NP - Spot not present in the preparative gel                          | NP   | NP     | NP    | NP | -1.2  | 0.0159   | -1.01 | 0.873    | -1.08 | 0.301    | 0.0773   |
| 150 | P17661 | DESM  | Desmin                                                                  | Cytoplasm             | 1. Structural and Contractile Proteins                                    | 5.21 | 53.40  | 15.58 | 20 | 1.44  | 4.11E-03 | 1.44  | 3.58E-03 | 1.81  | 4.66E-05 | 1.86E-06 |
| 151 | NP     | NP    | NP - Spot not present in the preparative gel                            | NP                    | 11. NP - Spot not present in the preparative gel                          | NP   | NP     | NP    | NP | -1.17 | 0.152    | 1.03  | 0.677    | -1.04 | 0.702    | 3.96E-03 |
| 152 | NP     | NP    | NP - Spot not present in the preparative gel                            | NP                    | 11. NP - Spot not present in the preparative gel                          | NP   | NP     | NP    | NP | -1.47 | 0.0454   | -1.43 | 0.0722   | -1.08 | 0.608    | 0.0104   |
| 153 | A8MWA6 | F90AM | Putative protein FAM90A22                                               | Other                 | 9. Other Functions                                                        | 9.86 | 49.87  | 73*   | 5  | 1.26  | 9.96E-03 | 1.06  | 0.789    | 1.13  | 0.0543   | 0.164    |
| 154 | NP     | NP    | NP - Spot not present in the preparative gel                            | NP                    | 11. NP - Spot not present in the preparative gel                          | NP   | NP     | NP    | NP | 1.29  | 0.04     | -1.04 | 0.573    | -1.04 | 0.773    | 0.333    |
| 155 | Q7Z3D6 | CN159 | UPF0317 protein C14orf159, mitochondrial                                | Mitochondria          | 9. Other Functions                                                        | 5.87 | 63.15  | 60*   | 5  | 1.27  | 0.0538   | -1.02 | 0.691    | 1.08  | 0.537    | 0.247    |
| 156 | Q16134 | ETFD  | Electron transfer flavoprotein-ubiquinone oxidoreductase, mitochondrial | Mitochondria          | 2.4. Energy Metabolism - Oxidative Phosphorylation and Electron Transport | 6.52 | 64.68  | 6.04  | 6  | -1.02 | 0.894    | 1.32  | 0.0329   | 1.04  | 0.817    | 0.0761   |
| 157 | Q16134 | ETFD  | Electron transfer flavoprotein-ubiquinone oxidoreductase, mitochondrial | Mitochondria          | 2.4. Energy Metabolism - Oxidative Phosphorylation and Electron Transport | 6.52 | 64.68  | 7.4   | 9  | -1.14 | 0.198    | 1.16  | 0.0831   | -1.02 | 0.833    | 0.0229   |
| 158 | Q16134 | ETFD  | Electron transfer flavoprotein-ubiquinone oxidoreductase, mitochondrial | Mitochondria          | 2.4. Energy Metabolism - Oxidative Phosphorylation and Electron Transport | 6.52 | 64.68  | 6.67  | 5  | -1.02 | 0.886    | 1.17  | 0.083    | 1.04  | 0.619    | 0.443    |
| 159 | P17661 | DESM  | Desmin                                                                  | Cytoplasm             | 1. Structural and Contractile Proteins                                    | 5.21 | 53.40  | 12.54 | 16 | 1.21  | 0.0849   | 1.25  | 0.0543   | 1.61  | 7.28E-05 | 1.81E-05 |
| 160 | NP     | NP    | NP - Spot not present in the preparative gel                            | NP                    | 11. NP - Spot not present in the preparative gel                          | NP   | NP     | NP    | NP | -1.35 | 0.0604   | -1.37 | 2.61E-03 | -1.15 | 0.234    | 0.339    |
| 161 | Q8TCG1 | CIP2A | Protein CIP2A                                                           | Cytoplasm             | 9. Other Functions                                                        | 5.85 | 102.19 | 53*   | 7  | 1.41  | 0.122    | -1.11 | 0.8      | 1.61  | 0.0334   | 0.0702   |
| 162 | P01009 | A1AT  | Alpha-1-antitrypsin precursor                                           | Secreted              | 3. Stress Response and Apoptosis                                          | 5.37 | 44.32  | 11.13 | 7  | 1.32  | 0.167    | -1.22 | 0.389    | 1.5   | 0.0514   | 0.0444   |
| 163 | P01009 | A1AT  | Alpha-1-antitrypsin precursor                                           | Secreted              | 3. Stress Response and Apoptosis                                          | 5.37 | 44.32  | 14.13 | 12 | 1.23  | 0.288    | -1.29 | 0.189    | 1.4   | 0.111    | 0.0404   |
| 164 | P27338 | AOFB  | Amine oxidase [flavin-containing] B                                     | Mitochondria          | 2.6. Other Metabolic Processes                                            | 7.18 | 58.63  | 71*   | 6  | 1.31  | 0.0268   | 1.61  | 2.63E-03 | 1.56  | 1.46E-03 | 0.0267   |
| 165 | Q13114 | TRAF3 | TNF receptor-associated factor 3                                        | Cytoplasm             | 3. Stress Response and Apoptosis                                          | 8.23 | 64.49  | 52*   | 5  | 1.24  | 0.0279   | 1.03  | 0.639    | 1.24  | 3.45E-03 | 0.017    |
| 166 | P36871 | PGM1  | Phosphoglucomutase-1                                                    | Cytoplasm             | 2.6. Other Metabolic Processes                                            | 6.32 | 61.32  | 6.53  | 5  | 1.09  | 0.429    | 1.24  | 0.0127   | 1.14  | 0.113    | 0.356    |
| 167 | P01009 | A1AT  | Alpha-1-antitrypsin precursor                                           | Secreted              | 3. Stress Response and Apoptosis                                          | 5.37 | 44.32  | 14.99 | 11 | 1.18  | 0.419    | -1.24 | 0.164    | 1.31  | 0.205    | 0.0587   |
| 168 | NI     | NI    | NI - Spot not identified by MS                                          | NI                    | 10. NI - Spot not identified by MS                                        | NI   | NI     | NI    | NI | 1.4   | 1.55E-03 | 1.39  | 5.65E-03 | 1.57  | 8.64E-05 | 2.21E-05 |
| 169 | NI     | NI    | NI - Spot not identified by MS                                          | NI                    | 10. NI - Spot not identified by MS                                        | NI   | NI     | NI    | NI | 1.12  | 0.56     | -1.07 | 0.475    | 1.15  | 0.132    | 0.269    |
| 170 | Q13114 | TRAF3 | TNF receptor-associated factor 3                                        | Cytoplasm             | 3. Stress Response and Apoptosis                                          | 8.23 | 64.49  | 50*   | 5  | 1.7   | 3.36E-06 | 1.35  | 4.42E-03 | 1.85  | 1.36E-08 | 2.30E-09 |
| 171 | P30038 | AL4A1 | Delta-1-pyrroline-5-carboxylate dehydrogenase, mitochondrial            | Mitochondria          | 2.4. Energy Metabolism - Oxidative Phosphorylation and Electron Transport | 6.96 | 59.03  | 9.28  | 6  | 1.43  | 1.62E-04 | 1.32  | 3.73E-04 | 1.52  | 2.90E-05 | 7.64E-07 |
| 172 | NP     | NP    | NP - Spot not present in the preparative gel                            | NP                    | 11. NP - Spot not present in the preparative gel                          | NP   | NP     | NP    | NP | 1.96  | 4.58E-04 | 1.13  | 0.211    | 1.47  | 2.07E-03 | 7.71E-05 |
| 173 | P10809 | CH60  | 60 kDa heat shock protein, mitochondrial                                | Mitochondria          | 3. Stress Response and Apoptosis                                          | 5.24 | 57.96  | 18.32 | 12 | 1.09  | 0.275    | 1.25  | 0.0144   | 1.19  | 0.0429   | 1.98E-03 |
| 174 | P07237 | PDIA1 | Protein disulfide-isomerase precursor                                   | Endoplasmic reticulum | 3. Stress Response and Apoptosis                                          | 4.69 | 55.29  | 16.16 | 4  | 2.01  | 2.41E-04 | 1.26  | 0.0638   | 1.78  | 1.77E-05 | 2.15E-07 |
| 175 | Q13325 | IFIT5 | Interferon-induced protein with tetratricopeptide repeats 5             | Cytoplasm             | 9. Other Functions                                                        | 7.00 | 55.85  | 43*   | 4  | 1.41  | 0.0132   | 1     | 0.946    | 1.55  | 6.27E-04 | 2.75E-04 |
| 176 | P01009 | A1AT  | Alpha-1-antitrypsin precursor                                           | Secreted              | 3. Stress Response and Apoptosis                                          | 5.37 | 44.32  | 11.33 | 9  | 1.15  | 0.546    | -1.13 | 0.349    | 1.31  | 0.103    | 0.0852   |
| 177 | NP     | NP    | NP - Spot not present in the preparative gel                            | NP                    | 11. NP - Spot not present in the preparative gel                          | NP   | NP     | NP    | NP | -1.17 | 0.205    | -1.38 | 0.021    | -1.13 | 0.306    | 0.19     |
| 178 | P04040 | CATA  | Catalase                                                                | Cytoplasm             | 3. Stress Response and Apoptosis                                          | 6.95 | 59.62  | 6.44  | 5  | 1.48  | 6.48E-04 | 1.04  | 0.69     | 1.21  | 0.0166   | 0.0212   |
| 179 | NP     | NP    | NP - Spot not present in the preparative gel                            | NP                    | 11. NP - Spot not present in the preparative gel                          | NP   | NP     | NP    | NP | 1.03  | 1        | -1    | 0.945    | -1.03 | 0.74     | 0.639    |
| 180 | NP     | NP    | NP - Spot not present in the preparative gel                            | NP                    | 11. NP - Spot not present in the preparative gel                          | NP   | NP     | NP    | NP | 1.28  | 0.0144   | -1.03 | 0.724    | 1.28  | 4.05E-04 | 2.85E-05 |
| 181 | P04040 | CATA  | Catalase                                                                | Cytoplasm             | 3. Stress Response and Apoptosis                                          | 6.95 | 59.62  | 45*   | 4  | 1.22  | 7.22E-03 | 1.13  | 0.0924   | 1.17  | 0.0338   | 0.029    |
| 182 | P14618 | KPYM  | Pyruvate kinase isozymes M1/M2                                          | Cytoplasm             | 2.1. Energy Metabolism - Glycolysis                                       | 7.95 | 57.81  | 72*   | 5  | 1.18  | 0.0421   | 1.13  | 0.0158   | 1.14  | 6.04E-03 | 0.0418   |
| 183 | P14618 | KPYM  | Pyruvate kinase isozymes M1/M2                                          | Cytoplasm             | 2.1. Energy Metabolism - Glycolysis                                       | 7.95 | 57.81  | 8.6   | 7  | 1.16  | 0.0307   | 1.15  | 7.02E-03 | 1.16  | 5.64E-03 | 5.19E-03 |

|     |        |       |                                                                      |                       |                                                                           |           |           |       |    |       |          |       |          |       |          |          |
|-----|--------|-------|----------------------------------------------------------------------|-----------------------|---------------------------------------------------------------------------|-----------|-----------|-------|----|-------|----------|-------|----------|-------|----------|----------|
| 184 | NI     | NI    | NI - Spot not identified by MS                                       | NI                    | 10. NI - Spot not identified by MS                                        | NI        | NI        | NI    | NI | 1.63  | 3.78E-04 | 1.25  | 0.0193   | 1.34  | 2.65E-03 | 3.78E-04 |
| 185 | P14618 | KPYM  | Pyruvate kinase isozymes M1/M2                                       | Cytoplasm             | 2.1. Energy Metabolism - Glycolysis                                       | 7.95      | 57.81     | 59*   | 4  | 1.02  | 0.748    | 1.13  | 0.0573   | 1.05  | 0.409    | 8.39E-03 |
| 186 | NP     | NP    | NP - Spot not present in the preparative gel                         | NP                    | 11. NP - Spot not present in the preparative gel                          | NP        | NP        | NP    | NP | -1.46 | 0.012    | -1.49 | 0.0138   | -1.37 | 0.0461   | 0.147    |
| 187 | Q9BQE3 | TBA1C | Tubulin alpha-1C chain                                               | Cytoskeleton          | 1. Structural and Contractile Proteins                                    | 4.96      | 49.90     | 12.22 | 8  | 1.81  | 1.51E-03 | 1.32  | 0.0255   | 1.92  | 2.79E-06 | 2.97E-04 |
| 188 | NI     | NI    | NI - Spot not identified by MS                                       | NI                    | 10. NI - Spot not identified by MS                                        | NI        | NI        | NI    | NI | 1.62  | 7.70E-04 | 1.03  | 0.613    | 1.45  | 3.00E-04 | 2.21E-07 |
| 189 | Q76G19 | PDZD4 | PDZ domain-containing protein 4                                      | Cytoplasm             | 9. Other Functions                                                        | 5.80      | 86.17     | 58*   | 8  | 1.63  | 1.28E-04 | 1.15  | 0.0862   | 1.37  | 1.30E-03 | 3.74E-05 |
| 190 | P30101 | PDIA3 | Protein disulfide-isomerase A3 precursor                             | Endoplasmic reticulum | 3. Stress Response and Apoptosis                                          | 5.61      | 54.27     | 8.67  | 9  | 1.67  | 1.02E-03 | 1.13  | 0.119    | 1.51  | 4.99E-05 | 1.12E-07 |
| 191 | P30101 | PDIA3 | Protein disulfide-isomerase A3 precursor                             | Endoplasmic reticulum | 3. Stress Response and Apoptosis                                          | 5.61      | 54.27     | 11.54 | 11 | 1.64  | 8.83E-05 | 1.06  | 0.387    | 1.48  | 7.49E-06 | 9.70E-09 |
| 192 | NP     | NP    | NP - Spot not present in the preparative gel                         | NP                    | 11. NP - Spot not present in the preparative gel                          | NP        | NP        | NP    | NP | 1.5   | 0.0214   | -1.06 | 0.616    | 1.47  | 0.0106   | 4.39E-03 |
| 193 | Q9HCC0 | MCCB  | Methylcrotonoyl-CoA carboxylase beta chain, mitochondrial            | Mitochondria          | 2.6. Other Metabolic Processes                                            | 6.47      | 58.99     | 9.78  | 6  | 1.22  | 1.31E-04 | 1     | 0.949    | 1.14  | 0.243    | 0.0864   |
| 194 | Q96AX9 | MIB2  | E3 ubiquitin-protein ligase MIB2                                     | Cytoplasm             | 8. Proteasome-Ubiquitin Process                                           | 8.81      | 109.94    | 64*   | 9  | 1.32  | 2.31E-03 | 1.02  | 0.787    | 1.29  | 6.79E-03 | 9.46E-03 |
| 195 | NI     | NI    | NI - Spot not identified by MS                                       | NI                    | 10. NI - Spot not identified by MS                                        | NI        | NI        | NI    | NI | 1.64  | 1.39E-03 | 1.35  | 0.0133   | 1.59  | 6.54E-04 | 7.01E-06 |
| 196 | P09622 | DLDH  | Dihydropyridol dehydrogenase, mitochondrial precursor                | Mitochondria          | 2.4. Energy Metabolism - Oxidative Phosphorylation and Electron Transport | 6.50      | 50.17     | 8.12  | 4  | 1.41  | 2.78E-05 | 1.14  | 0.0649   | 1.34  | 1.47E-03 | 1.01E-05 |
| 197 | P09622 | DLDH  | Dihydropyridol dehydrogenase, mitochondrial precursor                | Mitochondria          | 2.4. Energy Metabolism - Oxidative Phosphorylation and Electron Transport | 6.50      | 50.17     | 10.9  | 7  | 1.23  | 7.52E-05 | 1.14  | 7.12E-03 | 1.21  | 2.94E-03 | 3.85E-04 |
| 198 | P09622 | DLDH  | Dihydropyridol dehydrogenase, mitochondrial precursor                | Mitochondria          | 2.4. Energy Metabolism - Oxidative Phosphorylation and Electron Transport | 6.50      | 50.17     | 8.19  | 4  | 1.21  | 1.72E-03 | 1.2   | 0.0105   | 1.22  | 5.98E-03 | 6.65E-03 |
| 199 | P42345 | FRAP  | Serine/threonine-protein kinase mTOR                                 | Endoplasmic reticulum | 5. Cell Signaling                                                         | 6.73      | 288.89    | 51*   | 10 | -1.54 | 0.0501   | -1.7  | 0.0276   | -1.26 | 0.252    | 3.91E-03 |
| 200 | P07437 | TBB5  | Tubulin beta-5 chain                                                 | Cytoskeleton          | 1. Structural and Contractile Proteins                                    | 4.78      | 49.67     | 6.28  | 6  | 1.76  | 2.13E-04 | 1.21  | 0.111    | 1.76  | 3.74E-08 | 1.63E-05 |
| 201 | P07437 | TBB5  | Tubulin beta-5 chain                                                 | Cytoskeleton          | 1. Structural and Contractile Proteins                                    | 4.78      | 49.67     | 8.66  | 9  | 1.44  | 1.25E-03 | 1.1   | 0.507    | 1.42  | 2.15E-05 | 2.59E-04 |
| 202 | P07437 | TBB5  | Tubulin beta-5 chain                                                 | Cytoskeleton          | 1. Structural and Contractile Proteins                                    | 4.78      | 49.67     | 9.48  | 10 | 1.16  | 0.142    | -1.07 | 0.483    | 1.1   | 0.343    | 0.116    |
| 203 | NP     | NP    | NP - Spot not present in the preparative gel                         | NP                    | 11. NP - Spot not present in the preparative gel                          | NP        | NP        | NP    | NP | -1.42 | 0.0509   | -1.36 | 0.0967   | -1.01 | 0.879    | 0.0307   |
| 204 | NP     | NP    | NP - Spot not present in the preparative gel                         | NP                    | 11. NP - Spot not present in the preparative gel                          | NP        | NP        | NP    | NP | 1.19  | 0.044    | -1    | 0.733    | 1.09  | 0.0717   | 0.0142   |
| 205 | NI     | NI    | NI - Spot not identified by MS                                       | NI                    | 10. NI - Spot not identified by MS                                        | NI        | NI        | NI    | NI | 1.6   | 4.27E-05 | 1.26  | 5.20E-03 | 1.23  | 0.0605   | 3.11E-05 |
| 206 | P06744 | G6PI  | Glucose-6-phosphate isomerase                                        | Cytoplasm             | 2.1. Energy Metabolism - Glycolysis                                       | 8.44      | 63.02     | 10.26 | 6  | 2.39  | 1.32E-04 | 1.49  | 4.47E-03 | 1.53  | 1.67E-03 | 4.41E-06 |
| 207 | Q9BSD4 | YP016 | Uncharacterized protein MGC16385                                     | Other                 | 9. Other Functions                                                        | undefined | undefined | 66*   | 4  | 2.44  | 1.18E-06 | 1.33  | 5.01E-03 | 1.66  | 4.55E-05 | 1.43E-08 |
| 208 | P55809 | SCOT1 | Succinyl-CoA:3-ketoacid-coenzyme A transferase 1, mitochondrial      | Mitochondria          | 2.6. Other Metabolic Processes                                            | 6.00      | 52.09     | 69*   | 6  | 1.38  | 7.56E-03 | 1.02  | 0.997    | 1.21  | 3.86E-03 | 1.97E-04 |
| 209 | NI     | NI    | NI - Spot not identified by MS                                       | NI                    | 10. NI - Spot not identified by MS                                        | NI        | NI        | NI    | NI | 1.44  | 0.0273   | 1.14  | 0.284    | 1.38  | 2.33E-04 | 1.62E-03 |
| 210 | NP     | NP    | NP - Spot not present in the preparative gel                         | NP                    | 11. NP - Spot not present in the preparative gel                          | NP        | NP        | NP    | NP | -1.24 | 0.417    | -1.43 | 0.135    | -1.21 | 0.433    | 0.0227   |
| 211 | NP     | NP    | NP - Spot not present in the preparative gel                         | NP                    | 11. NP - Spot not present in the preparative gel                          | NP        | NP        | NP    | NP | 3.35  | 5.74E-08 | 1.71  | 4.27E-03 | 1.92  | 1.94E-06 | 2.50E-06 |
| 212 | P01857 | IGHG1 | Ig gamma-1 chain C region.                                           | Secreted              | 4. Immune Response                                                        | undefined | undefined | 9     | 5  | 4.19  | 8.66E-08 | 2     | 2.80E-03 | 2.43  | 9.91E-07 | 4.82E-07 |
| 213 | P17661 | DESM  | Desmin                                                               | Cytoplasm             | 1. Structural and Contractile Proteins                                    | 5.21      | 53.40     | 65*   | 9  | 1.95  | 1.02E-03 | 1.77  | 8.61E-03 | 2.92  | 5.77E-06 | 9.02E-09 |
| 214 | P01857 | IGHG1 | Ig gamma-1 chain C region.                                           | Secreted              | 4. Immune Response                                                        | undefined | undefined | 9.97  | 5  | 5.09  | 3.10E-06 | 2.07  | 2.33E-03 | 2.7   | 1.66E-06 | 8.71E-07 |
| 215 | NI     | NI    | NI - Spot not identified by MS                                       | NI                    | 10. NI - Spot not identified by MS                                        | NI        | NI        | NI    | NI | 1.43  | 9.00E-04 | -1.03 | 0.868    | 1.06  | 0.38     | 2.07E-04 |
| 216 | P00367 | DHE3  | Glutamate dehydrogenase 1, mitochondrial                             | Mitochondria          | 2.6. Other Metabolic Processes                                            | 6.71      | 56.01     | 7.84  | 5  | 1.5   | 2.65E-05 | 1.16  | 9.86E-03 | 1.29  | 2.44E-04 | 1.16E-06 |
| 217 | NP     | NP    | NP - Spot not present in the preparative gel                         | NP                    | 11. NP - Spot not present in the preparative gel                          | NP        | NP        | NP    | NP | 1.85  | 6.94E-05 | 1.31  | 6.09E-03 | 1.51  | 9.06E-04 | 4.25E-05 |
| 218 | Q02252 | MMSA  | Methylmalonate-semialdehyde dehydrogenase [acylating], mitochondrial | Mitochondria          | 2.6. Other Metabolic Processes                                            | 8.01      | 54.39     | 5.99  | 6  | 1.86  | 4.60E-05 | 1.3   | 9.31E-04 | 1.43  | 2.82E-05 | 9.27E-07 |
| 219 | NI     | NI    | NI - Spot not identified by MS                                       | NI                    | 10. NI - Spot not identified by MS                                        | NI        | NI        | NI    | NI | 1.58  | 1.72E-05 | 1.14  | 0.0477   | 1.34  | 6.75E-04 | 1.52E-08 |
| 220 | P01857 | IGHG1 | Ig gamma-1 chain C region.                                           | Secreted              | 4. Immune Response                                                        | undefined | undefined | 7.65  | 5  | 4.32  | 7.87E-06 | 1.86  | 1.27E-03 | 2.43  | 1.42E-06 | 1.71E-06 |

|     |        |       |                                                               |                       |                                                                           |      |        |       |    |       |          |       |          |       |          |          |
|-----|--------|-------|---------------------------------------------------------------|-----------------------|---------------------------------------------------------------------------|------|--------|-------|----|-------|----------|-------|----------|-------|----------|----------|
| 221 | NP     | NP    | NP - Spot not present in the preparative gel                  | NP                    | 11. NP - Spot not present in the preparative gel                          | NP   | NP     | NP    | NP | 1.36  | 3.84E-05 | 1.05  | 0.19     | 1.18  | 4.40E-03 | 6.35E-07 |
| 222 | Q8NEB9 | PK3C3 | Phosphatidylinositol 3-kinase catalytic subunit type 3        | Cytoplasm             | 5. Cell Signaling                                                         | 6.37 | 101.55 | 67*   | 10 | -1.08 | 0.459    | -1.09 | 0.451    | 1.21  | 0.0431   | 0.0485   |
| 223 | P17661 | DESM  | Desmin                                                        | Cytoplasm             | 1. Structural and Contractile Proteins                                    | 5.21 | 53.40  | 11.01 | 7  | 1.29  | 0.0446   | 1.15  | 0.254    | 1.87  | 3.21E-05 | 5.17E-06 |
| 224 | NP     | NP    | NP - Spot not present in the preparative gel                  | NP                    | 11. NP - Spot not present in the preparative gel                          | NP   | NP     | NP    | NP | 1.61  | 5.36E-04 | 1.17  | 0.0766   | 1.34  | 0.0132   | 4.28E-04 |
| 225 | P25705 | ATPA  | ATP synthase subunit alpha, mitochondrial                     | Mitochondria          | 2.4. Energy Metabolism - Oxidative Phosphorylation and Electron Transport | 8.28 | 55.21  | 8.74  | 6  | 1.86  | 6.97E-05 | 1.29  | 4.08E-03 | 1.37  | 1.31E-04 | 9.37E-05 |
| 226 | P17661 | DESM  | Desmin                                                        | Cytoplasm             | 1. Structural and Contractile Proteins                                    | 5.21 | 53.40  | 6.4   | 5  | -1.01 | 0.924    | -1.04 | 0.637    | 1.35  | 2.11E-03 | 1.56E-03 |
| 227 | P25705 | ATPA  | ATP synthase subunit alpha, mitochondrial                     | Mitochondria          | 2.4. Energy Metabolism - Oxidative Phosphorylation and Electron Transport | 8.28 | 55.21  | 111*  | 12 | 1.45  | 1.30E-05 | 1.17  | 5.14E-03 | 1.18  | 9.37E-03 | 1.88E-03 |
| 228 | P05091 | ALDH2 | Aldehyde dehydrogenase, mitochondrial                         | Mitochondria          | 2.6. Other Metabolic Processes                                            | 5.69 | 54.44  | 6.95  | 6  | -1.1  | 0.257    | -1.1  | 0.224    | 1.05  | 0.437    | 0.168    |
| 229 | P25705 | ATPA  | ATP synthase subunit alpha, mitochondrial                     | Mitochondria          | 2.4. Energy Metabolism - Oxidative Phosphorylation and Electron Transport | 8.28 | 55.21  | 68*   | 7  | 1.17  | 0.0187   | 1.15  | 0.0674   | 1.03  | 0.714    | 0.0274   |
| 230 | P05091 | ALDH2 | Aldehyde dehydrogenase, mitochondrial                         | Mitochondria          | 2.6. Other Metabolic Processes                                            | 5.69 | 54.44  | 10.81 | 10 | -1.09 | 0.217    | -1.1  | 0.155    | -1.02 | 0.8      | 0.338    |
| 231 | P05091 | ALDH2 | Aldehyde dehydrogenase, mitochondrial                         | Mitochondria          | 2.6. Other Metabolic Processes                                            | 5.69 | 54.44  | 13.65 | 6  | -1.13 | 0.081    | -1.07 | 0.245    | -1.07 | 0.3      | 0.115    |
| 232 | Q6P2E9 | EDC4  | Enhancer of mRNA-decapping protein 4                          | Cytoplasm             | 6. Transcription and Translation Processes                                | 5.55 | 151.53 | 7.48  | 5  | -1.13 | 0.12     | -1.13 | 0.0697   | -1.24 | 2.28E-03 | 2.64E-03 |
| 233 | Q86TD4 | SRCA  | Sarcalumenin                                                  | Endoplasmic reticulum | 6. Transcription and Translation Processes                                | 4.33 | 98.73  | 92*   | 13 | -1.01 | 0.866    | -1.05 | 0.382    | -1.07 | 0.14     | 2.36E-03 |
| 234 | NI     | NI    | NI - Spot not identified by MS                                | NI                    | 10. NI - Spot not identified by MS                                        | NI   | NI     | NI    | NI | 1.62  | 1.10E-05 | 1.23  | 9.88E-03 | 1.39  | 2.72E-05 | 1.58E-06 |
| 235 | NP     | NP    | NP - Spot not present in the preparative gel                  | NP                    | 11. NP - Spot not present in the preparative gel                          | NP   | NP     | NP    | NP | 1.41  | 2.75E-03 | 1.08  | 0.143    | 1.21  | 7.42E-03 | 2.64E-03 |
| 236 | P36957 | ODO2  | 2-oxoglutarate dehydrogenase E2 component, mitochondrial      | Mitochondria          | 2.3. Energy Metabolism - Tricarboxylic Acid Cycle                         | 5.90 | 41.39  | 10.62 | 4  | 1.03  | 0.687    | 1.08  | 0.174    | 1.15  | 6.71E-03 | 0.0916   |
| 237 | NI     | NI    | NI - Spot not identified by MS                                | NI                    | 10. NI - Spot not identified by MS                                        | NI   | NI     | NI    | NI | 1.01  | 0.846    | -1.02 | 0.758    | 1.05  | 0.353    | 0.105    |
| 238 | NP     | NP    | NP - Spot not present in the preparative gel                  | NP                    | 11. NP - Spot not present in the preparative gel                          | NP   | NP     | NP    | NP | 1.35  | 4.46E-04 | 1.07  | 0.33     | 1.17  | 0.0208   | 2.17E-03 |
| 239 | P28838 | AMPL  | Cytosol aminopeptidase                                        | Cytoplasm             | 9. Other Functions                                                        | 8.03 | 56.17  | 59*   | 6  | 1.49  | 9.24E-05 | 1.14  | 0.0252   | 1.23  | 5.25E-03 | 3.65E-04 |
| 240 | P28838 | AMPL  | Cytosol aminopeptidase                                        | Cytoplasm             | 9. Other Functions                                                        | 8.03 | 56.17  | 60*   | 7  | 1.27  | 1.16E-04 | 1.02  | 0.816    | 1.04  | 0.392    | 2.34E-03 |
| 241 | P25705 | ATPA  | ATP synthase subunit alpha, mitochondrial                     | Mitochondria          | 2.4. Energy Metabolism - Oxidative Phosphorylation and Electron Transport | 8.28 | 55.21  | 89*   | 14 | 1.1   | 0.0122   | 1.03  | 0.593    | 1.02  | 0.579    | 1.26E-03 |
| 242 | Q8IWZ8 | SF04  | Splicing factor 4                                             | Nucleus               | 6. Transcription and Translation Processes                                | 7.20 | 72.47  | 57*   | 7  | 1.12  | 0.301    | 1.03  | 0.742    | 1.07  | 0.489    | 0.795    |
| 243 | P06576 | ATPB  | ATP synthase subunit beta, mitochondrial                      | Mitochondria          | 2.4. Energy Metabolism - Oxidative Phosphorylation and Electron Transport | 5.00 | 51.77  | 11.71 | 6  | -1.16 | 0.0635   | -1.07 | 0.346    | -1.21 | 0.0142   | 5.93E-03 |
| 244 | P06576 | ATPB  | ATP synthase subunit beta, mitochondrial                      | Mitochondria          | 2.4. Energy Metabolism - Oxidative Phosphorylation and Electron Transport | 5.00 | 51.77  | 12.43 | 6  | -1.01 | 0.931    | -1.11 | 0.366    | -1.13 | 0.245    | 0.289    |
| 245 | NI     | NI    | NI - Spot not identified by MS                                | NI                    | 10. NI - Spot not identified by MS                                        | NI   | NI     | NI    | NI | 1.64  | 1.20E-04 | 1.4   | 6.86E-03 | 1.38  | 0.0147   | 1.42E-03 |
| 246 | P46734 | MP2K3 | Dual specificity mitogen-activated protein kinase kinase      | Cytoplasm             | 6. Transcription and Translation Processes                                | 7.05 | 39.32  | 63*   | 7  | 1.14  | 0.154    | 1.09  | 0.194    | 1.21  | 0.0293   | 0.0745   |
| 247 | Q8NFK5 | BPIL3 | Bactericidal/permeability-increasing protein-like 3           | Secreted              | 9. Other Functions                                                        | 8.85 | 47.79  | 55*   | 6  | 1.15  | 0.0641   | 1.17  | 4.45E-03 | 1.19  | 5.40E-04 | 1.63E-03 |
| 248 | P56703 | WNT3  | Proto-oncogene protein Wnt-3                                  | Cytoskeleton          | 5. Cell Signaling                                                         | 7.53 | 37.48  | 58*   | 6  | 1.14  | 0.0831   | 1.11  | 0.29     | 1.21  | 0.0787   | 0.16     |
| 249 | NP     | NP    | NP - Spot not present in the preparative gel                  | NP                    | 11. NP - Spot not present in the preparative gel                          | NP   | NP     | NP    | NP | -1.8  | 0.0281   | -1.33 | 0.287    | -1.26 | 0.293    | 0.0864   |
| 250 | P11182 | ODB2  | Lipoamide acyltransferase, mitochondrial                      | Mitochondria          | 2.6. Other Metabolic Processes                                            | 6.17 | 46.37  | 57*   | 6  | 1.03  | 0.561    | 1.07  | 0.502    | 1.07  | 0.517    | 0.598    |
| 251 | NI     | NI    | NI - Spot not identified by MS                                | NI                    | 10. NI - Spot not identified by MS                                        | NI   | NI     | NI    | NI | -1.25 | 4.81E-03 | -1.07 | 0.346    | -1.24 | 5.94E-03 | 3.65E-04 |
| 252 | P68104 | EF1A1 | Elongation factor 1-alpha 1                                   | Cytoplasm             | 6. Transcription and Translation Processes                                | 9.10 | 50.14  | 6.93  | 6  | 1     | 0.88     | -1.04 | 0.578    | 1.05  | 0.403    | 0.79     |
| 253 | NI     | NI    | NI - Spot not identified by MS                                | NI                    | 10. NI - Spot not identified by MS                                        | NI   | NI     | NI    | NI | 1.25  | 0.126    | 1.14  | 0.391    | 1.27  | 0.0905   | 0.398    |
| 254 | P61158 | ARP3  | Actin-like protein 3                                          | Cytoskeleton          | 1. Structural and Contractile Proteins                                    | 5.61 | 47.24  | 7.86  | 5  | 1.45  | 3.00E-03 | -1.09 | 0.335    | 1.22  | 0.0167   | 1.85E-05 |
| 255 | P42568 | AF9   | Protein AF-9                                                  | Nucleus               | 5. Cell Signaling                                                         | 8.77 | 63.35  | 56*   | 6  | 1.12  | 0.258    | -1.29 | 0.041    | 1.11  | 0.28     | 7.19E-03 |
| 256 | P49821 | NDUV1 | NADH dehydrogenase [ubiquinone] flavoprotein 1, mitochondrial | Mitochondria          | 2.4. Energy Metabolism - Oxidative Phosphorylation and Electron Transport | 7.53 | 48.51  | 14.33 | 10 | -1.21 | 0.0295   | 1.07  | 0.292    | -1.11 | 0.129    | 5.63E-04 |
| 257 | NP     | NP    | NP - Spot not present in the preparative gel                  | NP                    | 11. NP - Spot not present in the preparative gel                          | NP   | NP     | NP    | NP | -1.46 | 0.073    | -1.19 | 0.422    | -1.33 | 0.175    | 0.227    |

|     |        |       |                                                               |                       |                                                                           |      |        |       |    |       |          |       |        |       |          |          |
|-----|--------|-------|---------------------------------------------------------------|-----------------------|---------------------------------------------------------------------------|------|--------|-------|----|-------|----------|-------|--------|-------|----------|----------|
| 258 | P49821 | NDUV1 | NADH dehydrogenase [ubiquinone] flavoprotein 1, mitochondrial | Mitochondria          | 2.4. Energy Metabolism - Oxidative Phosphorylation and Electron Transport | 7.53 | 48.51  | 11.29 | 10 | -1.42 | 3.78E-03 | -1.11 | 0.348  | -1.25 | 0.0395   | 0.0872   |
| 259 | NP     | NP    | NP - Spot not present in the preparative gel                  | NP                    | 11. NP - Spot not present in the preparative gel                          | NP   | NP     | NP    | NP | -1.33 | 0.0359   | -1.11 | 0.368  | -1.2  | 0.0676   | 0.248    |
| 260 | Q75T13 | PGAP1 | GPI inositol-deacylase                                        | Endoplasmic reticulum | 9. Other Functions                                                        | 9.14 | 105.38 | 56*   | 5  | 1.02  | 0.73     | -1.07 | 0.704  | 1.03  | 0.736    | 0.936    |
| 261 | P49821 | NDUV1 | NADH dehydrogenase [ubiquinone] flavoprotein 1, mitochondrial | Mitochondria          | 2.4. Energy Metabolism - Oxidative Phosphorylation and Electron Transport | 7.53 | 48.51  | 10.53 | 7  | -1.34 | 0.123    | -1.15 | 0.453  | -1.23 | 0.278    | 0.512    |
| 262 | P49821 | NDUV1 | NADH dehydrogenase [ubiquinone] flavoprotein 1, mitochondrial | Mitochondria          | 2.4. Energy Metabolism - Oxidative Phosphorylation and Electron Transport | 7.53 | 48.51  | 12.68 | 10 | -1.4  | 1.40E-03 | -1.12 | 0.211  | -1.3  | 8.42E-03 | 3.55E-03 |
| 263 | NI     | NI    | NI - Spot not identified by MS                                | NI                    | 10. NI - Spot not identified by MS                                        | NI   | NI     | NI    | NI | 1.43  | 5.36E-05 | 1.06  | 0.235  | 1.29  | 9.15E-05 | 3.67E-08 |
| 264 | NI     | NI    | NI - Spot not identified by MS                                | NI                    | 10. NI - Spot not identified by MS                                        | NI   | NI     | NI    | NI | 1.34  | 5.42E-03 | -1.03 | 0.465  | 1.09  | 0.121    | 6.31E-05 |
| 265 | P14316 | IRF2  | Interferon regulatory factor 2                                | Nucleus               | 6. Transcription and Translation Processes                                | 7.07 | 39.35  | 79*   | 4  | 1.31  | 0.0112   | 1.03  | 0.687  | 1.14  | 0.0642   | 4.03E-05 |
| 266 | A8MQB9 | YR007 | Putative ankyrin repeat domain-containing protein             | Other                 | 9. Other Functions                                                        | 5.74 | 27.02  | 63*   | 5  | -1.42 | 0.0374   | -1.22 | 0.279  | -1.23 | 0.199    | 0.171    |
| 267 | P35609 | ACTN2 | Alpha-actinin-2 (Alpha actinin skeletal muscle isoform 2)     | Cytoskeleton          | 1. Structural and Contractile Proteins                                    | 5.31 | 103.85 | 7.32  | 4  | -1.72 | 0.0264   | -1.55 | 0.0716 | -1.58 | 0.0504   | 0.0163   |
| 268 | P06733 | ENOA  | Alpha-enolase (Non- neural enolase)                           | Cytoplasm             | 2.1. Energy Metabolism - Glycolysis                                       | 6.99 | 47.04  | 72*   | 5  | -1.04 | 0.5      | 1.01  | 0.758  | -1.05 | 0.399    | 0.188    |
| 269 | P06733 | ENOA  | Alpha-enolase (Non- neural enolase)                           | Cytoplasm             | 2.1. Energy Metabolism - Glycolysis                                       | 6.99 | 47.04  | 7.28  | 5  | -1    | 0.924    | 1.02  | 0.488  | -1.02 | 0.596    | 0.565    |
| 270 | P06733 | ENOA  | Alpha-enolase (Non- neural enolase)                           | Cytoplasm             | 2.1. Energy Metabolism - Glycolysis                                       | 6.99 | 47.04  | 61*   | 4  | 1.12  | 0.0766   | -1.03 | 0.681  | 1.01  | 0.755    | 0.414    |
| 271 | P06733 | ENOA  | Alpha-enolase (Non- neural enolase)                           | Cytoplasm             | 2.1. Energy Metabolism - Glycolysis                                       | 6.99 | 47.04  | 9.25  | 9  | -1.06 | 0.404    | 1.05  | 0.26   | -1.03 | 0.606    | 0.386    |
| 272 | P06733 | ENOA  | Alpha-enolase (Non- neural enolase)                           | Cytoplasm             | 2.1. Energy Metabolism - Glycolysis                                       | 6.99 | 47.04  | 10.44 | 8  | 1.36  | 1.58E-03 | 1.01  | 0.945  | 1.08  | 0.182    | 8.55E-03 |
| 273 | P48735 | IDHP  | Isocitrate dehydrogenase [NADP], mitochondrial                | Mitochondria          | 2.3. Energy Metabolism - Tricarboxylic Acid Cycle                         | 8.32 | 46.61  | 6.84  | 4  | -1.38 | 2.58E-03 | -1.27 | 0.0183 | -1.4  | 2.35E-04 | 1.18E-05 |
| 274 | P06733 | ENOA  | Alpha-enolase (Non- neural enolase)                           | Cytoplasm             | 2.1. Energy Metabolism - Glycolysis                                       | 6.99 | 47.04  | 11.29 | 9  | 1.15  | 0.128    | -1.09 | 0.205  | -1    | 0.987    | 0.0752   |
| 275 | NI     | NI    | NI - Spot not identified by MS                                | NI                    | 10. NI - Spot not identified by MS                                        | NI   | NI     | NI    | NI | -1.04 | 0.319    | 1.03  | 0.63   | -1.05 | 0.14     | 0.0184   |
| 276 | O75822 | EIF3J | Eukaryotic translation initiation factor 3 subunit            | Cytoplasm             | 6. Transcription and Translation Processes                                | 4.72 | 28.93  | 55*   | 4  | -1.27 | 1.55E-04 | -1.12 | 0.0786 | -1.22 | 5.29E-04 | 1.63E-04 |
| 277 | P13929 | ENOB  | Beta-enolase (Skeletal muscle enolase)                        | Cytoplasm             | 2.1. Energy Metabolism - Glycolysis                                       | 7.73 | 46.80  | 6.55  | 6  | -1.66 | 3.34E-04 | -1.28 | 0.0124 | -1.59 | 2.97E-04 | 8.21E-04 |
| 278 | NP     | NP    | NP - Spot not present in the preparative gel                  | NP                    | 11. NP - Spot not present in the preparative gel                          | NP   | NP     | NP    | NP | -1.64 | 4.80E-05 | -1.2  | 0.0839 | -1.31 | 0.0223   | 4.88E-03 |
| 279 | P31930 | QCR1  | Cytochrome b-c1 complex subunit 1, mitochondrial              | Mitochondria          | 2.4. Energy Metabolism - Oxidative Phosphorylation and Electron Transport | 5.43 | 49.13  | 26.47 | 6  | -1.08 | 0.136    | 1.01  | 0.793  | -1.1  | 0.0711   | 0.065    |
| 280 | NI     | NI    | NI - Spot not identified by MS                                | NI                    | 10. NI - Spot not identified by MS                                        | NI   | NI     | NI    | NI | -1.26 | 4.29E-03 | -1.05 | 0.361  | -1.24 | 3.23E-03 | 1.02E-04 |
| 281 | P31930 | QCR1  | Cytochrome b-c1 complex subunit 1, mitochondrial              | Mitochondria          | 2.4. Energy Metabolism - Oxidative Phosphorylation and Electron Transport | 5.43 | 49.13  | 10.75 | 7  | -1.18 | 6.06E-03 | -1    | 0.982  | -1.12 | 0.0452   | 1.90E-03 |
| 282 | P07954 | FUMH  | Fumarate hydratase, mitochondrial                             | Mitochondria          | 2.3. Energy Metabolism - Tricarboxylic Acid Cycle                         | 6.99 | 50.08  | 13.19 | 8  | -1.09 | 0.229    | 1.1   | 0.194  | -1.01 | 0.967    | 0.0226   |
| 283 | NI     | NI    | NI - Spot not identified by MS                                | NI                    | 10. NI - Spot not identified by MS                                        | NI   | NI     | NI    | NI | -1.41 | 1.78E-03 | -1.19 | 0.141  | -1.25 | 0.0185   | 5.03E-03 |
| 284 | NI     | NI    | NI - Spot not identified by MS                                | NI                    | 10. NI - Spot not identified by MS                                        | NI   | NI     | NI    | NI | -1.5  | 0.187    | 1.18  | 0.645  | -1.29 | 0.404    | 0.309    |
| 285 | NI     | NI    | NI - Spot not identified by MS                                | NI                    | 10. NI - Spot not identified by MS                                        | NI   | NI     | NI    | NI | -1.07 | 0.374    | 1.06  | 0.437  | -1.06 | 0.425    | 0.149    |
| 286 | P07954 | FUMH  | Fumarate hydratase, mitochondrial                             | Mitochondria          | 2.3. Energy Metabolism - Tricarboxylic Acid Cycle                         | 6.99 | 50.08  | 14.21 | 8  | -1.09 | 0.188    | 1.08  | 0.218  | -1.02 | 0.801    | 0.0869   |
| 287 | P07954 | FUMH  | Fumarate hydratase, mitochondrial                             | Mitochondria          | 2.3. Energy Metabolism - Tricarboxylic Acid Cycle                         | 6.99 | 50.08  | 45    | 9  | -1.47 | 3.04E-05 | -1.14 | 0.0273 | -1.34 | 1.34E-03 | 3.07E-04 |
| 288 | P60842 | IF4A1 | Eukaryotic initiation factor 4A-I                             | Cytoplasm             | 6. Transcription and Translation Processes                                | 5.32 | 46.15  | 57*   | 4  | -1.01 | 0.854    | -1.05 | 0.724  | 1.01  | 0.983    | 0.892    |
| 289 | P48735 | IDHP  | Isocitrate dehydrogenase [NADP], mitochondrial                | Mitochondria          | 2.3. Energy Metabolism - Tricarboxylic Acid Cycle                         | 8.32 | 46.61  | 11.31 | 13 | -1.3  | 1.52E-04 | -1.19 | 0.012  | -1.32 | 7.78E-05 | 8.44E-05 |
| 290 | P48735 | IDHP  | Isocitrate dehydrogenase [NADP], mitochondrial                | Mitochondria          | 2.3. Energy Metabolism - Tricarboxylic Acid Cycle                         | 8.32 | 46.61  | 44.27 | 13 | -1.27 | 1.66E-03 | -1.14 | 0.0438 | -1.27 | 1.11E-03 | 3.34E-04 |
| 291 | P17540 | KCRS  | Creatine kinase, sarcomeric mitochondrial                     | Mitochondria          | 2.5. Energy Metabolism - Creatine Kinase System (Energy Transduction)     | 7.28 | 43.34  | 5.76  | 7  | -1.18 | 0.145    | 1.17  | 0.146  | -1.12 | 0.29     | 3.40E-03 |
| 292 | P17540 | KCRS  | Creatine kinase, sarcomeric mitochondrial                     | Mitochondria          | 2.5. Energy Metabolism - Creatine Kinase System (Energy Transduction)     | 7.28 | 43.34  | 56*   | 4  | -1.27 | 0.0184   | -1.13 | 0.116  | -1.3  | 3.10E-03 | 0.0339   |
| 293 | P17540 | KCRS  | Creatine kinase, sarcomeric mitochondrial                     | Mitochondria          | 2.5. Energy Metabolism - Creatine Kinase System (Energy Transduction)     | 7.28 | 43.34  | 13.25 | 14 | -1.24 | 0.0142   | -1.09 | 0.339  | -1.14 | 0.0247   | 0.0326   |
| 294 | P49411 | EFTU  | Elongation factor Tu, mitochondrial precursor (EF-Tu) (P43).  | Mitochondria          | 6. Transcription and Translation Processes                                | 6.31 | 45.05  | 11.21 | 8  | -1.12 | 0.128    | 1.03  | 0.593  | 1.02  | 0.726    | 6.26E-03 |



|     |        |       |                                                              |              |                                                                       |      |       |       |    |       |          |       |          |       |          |          |
|-----|--------|-------|--------------------------------------------------------------|--------------|-----------------------------------------------------------------------|------|-------|-------|----|-------|----------|-------|----------|-------|----------|----------|
| 295 | P49411 | EFTU  | Elongation factor Tu, mitochondrial precursor (EF-Tu) (P43). | Mitochondria | 6. Transcription and Translation Processes                            | 6.31 | 45.05 | 15.47 | 14 | -1.17 | 0.0216   | -1.02 | 0.812    | -1.09 | 0.254    | 0.143    |
| 296 | P42765 | THIM  | 3-ketoacyl-CoA thiolase, mitochondrial                       | Mitochondria | 2.2. Energy Metabolism - Lipid Metabolism/ $\beta$ -Oxidation         | 8.32 | 41.92 | 10.7  | 9  | -1.29 | 6.39E-03 | 1.06  | 0.268    | -1.13 | 0.117    | 8.74E-05 |
| 297 | P42765 | THIM  | 3-ketoacyl-CoA thiolase, mitochondrial                       | Mitochondria | 2.2. Energy Metabolism - Lipid Metabolism/ $\beta$ -Oxidation         | 8.32 | 41.92 | 35.68 | 8  | -1.21 | 0.111    | 1.05  | 0.464    | -1.21 | 0.0262   | 9.66E-03 |
| 298 | NP     | NP    | NP - Spot not present in the preparative gel                 | NP           | 11. NP - Spot not present in the preparative gel                      | NP   | NP    | NP    | NP | -1.19 | 0.0605   | -1.08 | 0.453    | -1.22 | 0.038    | 0.0319   |
| 299 | P00558 | PGK1  | Phosphoglycerate kinase 1                                    | Cytoplasm    | 2.1. Energy Metabolism - Glycolysis                                   | 8.30 | 44.48 | 25.56 | 8  | -1.08 | 0.331    | 1.03  | 0.761    | -1.12 | 0.165    | 0.6      |
| 300 | P00558 | PGK1  | Phosphoglycerate kinase 1                                    | Cytoplasm    | 2.1. Energy Metabolism - Glycolysis                                   | 8.30 | 44.48 | 10.47 | 7  | -1.03 | 0.75     | 1.04  | 0.769    | -1.09 | 0.311    | 0.799    |
| 301 | NP     | NP    | NP - Spot not present in the preparative gel                 | NP           | 11. NP - Spot not present in the preparative gel                      | NP   | NP    | NP    | NP | -1.2  | 0.0368   | -1.01 | 0.922    | -1.01 | 0.852    | 0.0365   |
| 302 | P68032 | ACTC  | Actin, alpha cardiac muscle 1 (Alpha-cardiac actin)          | Cytoskeleton | 1. Structural and Contractile Proteins                                | 5.23 | 41.78 | 8.57  | 6  | -1.29 | 9.68E-04 | -1.13 | 0.151    | -1.18 | 0.0228   | 0.0368   |
| 303 | O75390 | CISY  | Citrate synthase, mitochondrial                              | Mitochondria | 2.3. Energy Metabolism - Tricarboxylic Acid Cycle                     | 7.39 | 49.01 | 10.18 | 8  | -1.08 | 0.357    | 1.04  | 0.549    | 1.01  | 0.872    | 0.364    |
| 304 | O75390 | CISY  | Citrate synthase, mitochondrial                              | Mitochondria | 2.3. Energy Metabolism - Tricarboxylic Acid Cycle                     | 7.39 | 49.01 | 7.68  | 5  | -1.17 | 0.0235   | 1.01  | 0.79     | -1.04 | 0.58     | 0.219    |
| 305 | P17540 | KCRS  | Creatine kinase, sarcomeric mitochondrial                    | Mitochondria | 2.5. Energy Metabolism - Creatine Kinase System (Energy Transduction) | 7.28 | 43.34 | 10.1  | 10 | -1.11 | 0.199    | 1.06  | 0.415    | -1.02 | 0.863    | 4.55E-03 |
| 306 | P68032 | ACTC  | Actin, alpha cardiac muscle 1 (Alpha-cardiac actin)          | Cytoskeleton | 1. Structural and Contractile Proteins                                | 5.23 | 41.78 | 35.68 | 5  | -1.04 | 0.817    | -1.05 | 0.719    | -1.05 | 0.687    | 0.729    |
| 307 | P68032 | ACTC  | Actin, alpha cardiac muscle 1 (Alpha-cardiac actin)          | Cytoskeleton | 1. Structural and Contractile Proteins                                | 5.23 | 41.78 | 9.99  | 5  | -1.06 | 0.387    | -1.04 | 0.63     | -1.05 | 0.507    | 0.161    |
| 308 | P12277 | KCRB  | Creatine kinase B-type                                       | Cytoplasm    | 2.5. Energy Metabolism - Creatine Kinase System (Energy Transduction) | 5.35 | 42.51 | 7.43  | 7  | -1.09 | 0.0739   | 1.12  | 0.0335   | 1.01  | 0.665    | 1.24E-04 |
| 309 | NP     | NP    | NP - Spot not present in the preparative gel                 | NP           | 11. NP - Spot not present in the preparative gel                      | NP   | NP    | NP    | NP | -1    | 0.835    | 1.05  | 0.13     | -1.04 | 0.319    | 0.0595   |
| 310 | P68032 | ACTC  | Actin, alpha cardiac muscle 1 (Alpha-cardiac actin)          | Cytoskeleton | 1. Structural and Contractile Proteins                                | 5.23 | 41.78 | 11.55 | 6  | -1.12 | 0.0734   | 1.03  | 0.558    | -1.11 | 0.0434   | 2.13E-03 |
| 311 | P68032 | ACTC  | Actin, alpha cardiac muscle 1 (Alpha-cardiac actin)          | Cytoskeleton | 1. Structural and Contractile Proteins                                | 5.23 | 41.78 | 10.83 | 6  | -1.3  | 1.30E-03 | -1.01 | 0.821    | -1.24 | 5.75E-04 | 3.29E-05 |
| 312 | P68032 | ACTC  | Actin, alpha cardiac muscle 1 (Alpha-cardiac actin)          | Cytoskeleton | 1. Structural and Contractile Proteins                                | 5.23 | 41.78 | 10.9  | 6  | -1.33 | 1.21E-03 | -1.04 | 0.574    | -1.29 | 4.44E-04 | 2.04E-05 |
| 313 | P08865 | RSSA  | 40S ribosomal protein AS                                     | Membrane     | 6. Transcription and Translation Processes                            | 4.79 | 32.72 | 9.14  | 4  | 1.03  | 0.653    | -1.05 | 0.698    | -1.02 | 0.959    | 0.612    |
| 314 | NP     | NP    | NP - Spot not present in the preparative gel                 | NP           | 11. NP - Spot not present in the preparative gel                      | NP   | NP    | NP    | NP | -1.06 | 0.178    | 1.02  | 0.647    | -1.07 | 0.126    | 0.11     |
| 315 | NP     | NP    | NP - Spot not present in the preparative gel                 | NP           | 11. NP - Spot not present in the preparative gel                      | NP   | NP    | NP    | NP | -1.07 | 0.0577   | 1.01  | 0.912    | -1.12 | 0.0173   | 0.0244   |
| 316 | NP     | NP    | NP - Spot not present in the preparative gel                 | NP           | 11. NP - Spot not present in the preparative gel                      | NP   | NP    | NP    | NP | -1.24 | 3.22E-03 | -1.05 | 0.425    | -1.24 | 9.55E-04 | 2.21E-04 |
| 317 | NP     | NP    | NP - Spot not present in the preparative gel                 | NP           | 11. NP - Spot not present in the preparative gel                      | NP   | NP    | NP    | NP | -1.26 | 3.64E-03 | -1.04 | 0.566    | -1.22 | 2.93E-03 | 1.06E-04 |
| 318 | P68032 | ACTC  | Actin, alpha cardiac muscle 1 (Alpha-cardiac actin)          | Cytoskeleton | 1. Structural and Contractile Proteins                                | 5.23 | 41.78 | 10.47 | 6  | -1.03 | 0.413    | 1.05  | 0.402    | -1.06 | 0.185    | 0.103    |
| 319 | P68032 | ACTC  | Actin, alpha cardiac muscle 1 (Alpha-cardiac actin)          | Cytoskeleton | 1. Structural and Contractile Proteins                                | 5.23 | 41.78 | 10.74 | 6  | -1.12 | 0.0321   | 1.01  | 0.87     | -1.08 | 0.0635   | 0.0735   |
| 320 | P68032 | ACTC  | Actin, alpha cardiac muscle 1 (Alpha-cardiac actin)          | Cytoskeleton | 1. Structural and Contractile Proteins                                | 5.23 | 41.78 | 9.77  | 6  | -1.35 | 2.17E-03 | -1.05 | 0.567    | -1.35 | 4.98E-04 | 2.70E-06 |
| 321 | P68032 | ACTC  | Actin, alpha cardiac muscle 1 (Alpha-cardiac actin)          | Cytoskeleton | 1. Structural and Contractile Proteins                                | 5.23 | 41.78 | 9.3   | 6  | -1.32 | 2.34E-03 | -1.06 | 0.41     | -1.34 | 1.08E-04 | 1.38E-07 |
| 322 | P68032 | ACTC  | Actin, alpha cardiac muscle 1 (Alpha-cardiac actin)          | Cytoskeleton | 1. Structural and Contractile Proteins                                | 5.23 | 41.78 | 9.82  | 6  | -1.29 | 5.26E-03 | -1.03 | 0.724    | -1.27 | 3.15E-03 | 2.23E-05 |
| 323 | P68032 | ACTC  | Actin, alpha cardiac muscle 1 (Alpha-cardiac actin)          | Cytoskeleton | 1. Structural and Contractile Proteins                                | 5.23 | 41.78 | 11.12 | 5  | -1.21 | 9.34E-03 | 1.03  | 0.663    | -1.14 | 0.0172   | 1.39E-05 |
| 324 | P06732 | KCRM  | Creatine kinase M-type                                       | Cytoplasm    | 2.5. Energy Metabolism - Creatine Kinase System (Energy Transduction) | 6.77 | 43.10 | 12.87 | 9  | -1.72 | 1.43E-04 | -1.29 | 0.0155   | -1.85 | 6.44E-07 | 7.60E-10 |
| 325 | P06732 | KCRM  | Creatine kinase M-type                                       | Cytoplasm    | 2.5. Energy Metabolism - Creatine Kinase System (Energy Transduction) | 6.77 | 43.10 | 11.77 | 10 | -1.8  | 4.20E-05 | -1.26 | 0.0115   | -1.9  | 4.42E-08 | 2.79E-10 |
| 326 | P06732 | KCRM  | Creatine kinase M-type                                       | Cytoplasm    | 2.5. Energy Metabolism - Creatine Kinase System (Energy Transduction) | 6.77 | 43.10 | 11.23 | 12 | -1.75 | 4.23E-05 | -1.26 | 9.62E-03 | -1.81 | 9.24E-08 | 3.69E-10 |
| 327 | P06732 | KCRM  | Creatine kinase M-type                                       | Cytoplasm    | 2.5. Energy Metabolism - Creatine Kinase System (Energy Transduction) | 6.77 | 43.10 | 9.16  | 8  | -1.48 | 3.56E-04 | -1.13 | 0.097    | -1.44 | 1.41E-05 | 0.0213   |
| 328 | P68032 | ACTC  | Actin, alpha cardiac muscle 1 (Alpha-cardiac actin)          | Cytoskeleton | 1. Structural and Contractile Proteins                                | 5.23 | 41.78 | 11.75 | 6  | -1.04 | 0.412    | -1.04 | 0.442    | -1.08 | 0.0526   | 0.307    |
| 329 | P04075 | ALDOA | Fructose-bisphosphate aldolase A (Muscle-type aldolase)      | Cytoplasm    | 2.1. Energy Metabolism - Glycolysis                                   | 8.39 | 39.29 | 7.33  | 10 | -1.15 | 0.018    | 1.08  | 0.122    | -1.16 | 0.0193   | 3.99E-04 |
| 330 | P04075 | ALDOA | Fructose-bisphosphate aldolase A (Muscle-type aldolase)      | Cytoplasm    | 2.1. Energy Metabolism - Glycolysis                                   | 8.39 | 39.29 | 10.61 | 14 | -1.14 | 0.0283   | 1.09  | 0.235    | -1.18 | 0.023    | 3.78E-03 |
| 331 | NI     | NI    | NI - Spot not identified by MS                               | NI           | 10. NI - Spot not identified by MS                                    | NI   | NI    | NI    | NI | -1.19 | 0.0298   | 1.09  | 0.0783   | -1.13 | 0.0389   | 1.35E-03 |

|     |        |        |                                                                   |              |                                                                           |       |        |       |    |       |          |       |          |       |          |          |
|-----|--------|--------|-------------------------------------------------------------------|--------------|---------------------------------------------------------------------------|-------|--------|-------|----|-------|----------|-------|----------|-------|----------|----------|
| 332 | P04075 | ALDOA  | Fructose-bisphosphate aldolase A (Muscle-type aldolase)           | Cytoplasm    | 2.1. Energy Metabolism - Glycolysis                                       | 8.39  | 39.29  | 7.13  | 4  | -1.24 | 2.97E-03 | 1.03  | 0.622    | -1.25 | 1.06E-03 | 4.43E-05 |
| 333 | P04075 | ALDOA  | Fructose-bisphosphate aldolase A (Muscle-type aldolase)           | Cytoplasm    | 2.1. Energy Metabolism - Glycolysis                                       | 8.39  | 39.29  | 7.63  | 9  | -1.15 | 0.0392   | 1.05  | 0.311    | -1.18 | 0.0145   | 4.96E-04 |
| 334 | P04075 | ALDOA  | Fructose-bisphosphate aldolase A (Muscle-type aldolase)           | Cytoplasm    | 2.1. Energy Metabolism - Glycolysis                                       | 8.39  | 39.29  | 35.18 | 9  | -1.18 | 0.0166   | 1.07  | 0.334    | -1.16 | 0.0631   | 2.29E-03 |
| 335 | P00505 | AATM   | Aspartate aminotransferase, mitochondrial                         | Mitochondria | 2.6. Other Metabolic Processes                                            | 8.98  | 44.74  | 9.75  | 4  | -1.08 | 0.237    | 1     | 0.951    | 1     | 0.985    | 0.441    |
| 336 | P00505 | AATM   | Aspartate aminotransferase, mitochondrial                         | Mitochondria | 2.6. Other Metabolic Processes                                            | 8.98  | 44.74  | 10.67 | 8  | -1.07 | 0.264    | 1.04  | 0.395    | 1.03  | 0.616    | 0.271    |
| 337 | P24752 | THIL   | Acetyl-CoA acetyltransferase, mitochondrial                       | Mitochondria | 2.6. Other Metabolic Processes                                            | 8.16  | 41.39  | 72*   | 6  | -1.28 | 1.36E-03 | 1.01  | 0.719    | -1.21 | 2.50E-03 | 1.86E-04 |
| 338 | P00505 | AATM   | Aspartate aminotransferase, mitochondrial                         | Mitochondria | 2.6. Other Metabolic Processes                                            | 8.98  | 44.74  | 10.27 | 11 | -1.06 | 0.253    | 1.08  | 0.187    | 1.07  | 0.411    | 0.446    |
| 339 | P00505 | AATM   | Aspartate aminotransferase, mitochondrial                         | Mitochondria | 2.6. Other Metabolic Processes                                            | 8.98  | 44.74  | 9.86  | 9  | -1.09 | 0.0926   | 1.07  | 0.213    | 1.03  | 0.888    | 0.573    |
| 340 | NP     | NP     | NP - Spot not present in the preparative gel                      | NP           | 11. NP - Spot not present in the preparative gel                          | NP    | NP     | NP    | NP | -1.1  | 0.289    | -1.02 | 0.828    | -1.11 | 0.219    | 0.308    |
| 341 | NP     | NP     | NP - Spot not present in the preparative gel                      | NP           | 11. NP - Spot not present in the preparative gel                          | NP    | NP     | NP    | NP | -1    | 0.945    | 1.09  | 0.23     | -1.04 | 0.504    | 0.306    |
| 342 | P04075 | ALDOA  | Fructose-bisphosphate aldolase A (Muscle-type aldolase)           | Cytoplasm    | 2.1. Energy Metabolism - Glycolysis                                       | 8.39  | 39.29  | 103*  | 7  | -1.15 | 0.0734   | -1.03 | 0.511    | -1.2  | 2.83E-03 | 6.52E-03 |
| 343 | Q15019 | SEPT2  | Septin-2                                                          | Cytoplasm    | 9. Other Functions                                                        | 6.15  | 41.49  | 9.46  | 7  | 1.1   | 0.157    | 1.11  | 0.127    | 1.03  | 0.612    | 0.534    |
| 344 | P09972 | ALDOC  | Fructose-bisphosphate aldolase C (Brain-type aldolase)            | Cytoplasm    | 2.1. Energy Metabolism - Glycolysis                                       | 6.46  | 39.32  | 5.84  | 6  | -1.31 | 1.30E-03 | -1.06 | 0.319    | -1.26 | 4.06E-03 | 3.28E-04 |
| 345 | P45379 | TNNT2  | Troponin T, cardiac muscle                                        | Cytoskeleton | 1. Structural and Contractile Proteins                                    | 4.94  | 35.79  | 7.41  | 7  | -1.2  | 0.0856   | -1.08 | 0.419    | -1.07 | 0.464    | 9.84E-03 |
| 346 | Q9UJZ1 | STML2  | Stomatin-like protein 2                                           | Membrane     | 1. Structural and Contractile Proteins                                    | 6.87  | 38.53  | 8.09  | 3  | -1.42 | 4.23E-03 | -1.11 | 0.283    | -1.26 | 0.0605   | 0.0757   |
| 347 | P45379 | TNNT2  | Troponin T, cardiac muscle                                        | Cytoskeleton | 1. Structural and Contractile Proteins                                    | 4.94  | 35.79  | 24.36 | 7  | -1.15 | 0.312    | 1.21  | 0.652    | -1.33 | 0.0225   | 0.0427   |
| 348 | Q99471 | PFD5   | Prefoldin subunit 5                                               | Cytoskeleton | 1. Structural and Contractile Proteins                                    | 5.96  | 17.20  | 56*   | 7  | -1.17 | 0.0856   | -1.1  | 0.327    | -1.04 | 0.581    | 0.0352   |
| 349 | P00505 | AATM   | Aspartate aminotransferase, mitochondrial                         | Mitochondria | 2.6. Other Metabolic Processes                                            | 8.98  | 44.74  | 6.83  | 4  | -1.09 | 0.33     | 1.02  | 0.867    | -1.06 | 0.495    | 0.144    |
| 350 | P17174 | AATC   | Aspartate aminotransferase, cytoplasmic                           | Cytoplasm    | 2.6. Other Metabolic Processes                                            | 6.57  | 46.12  | 95*   | 6  | -1.19 | 0.0306   | -1.11 | 0.117    | -1.16 | 0.0254   | 0.0145   |
| 351 | P45379 | TNNT2  | Troponin T, cardiac muscle                                        | Cytoskeleton | 1. Structural and Contractile Proteins                                    | 4.94  | 35.79  | 6.98  | 5  | -1.15 | 0.139    | -1.06 | 0.472    | 1.03  | 0.68     | 0.0172   |
| 352 | NI     | NI     | NI - Spot not identified by MS                                    | NI           | 10. NI - Spot not identified by MS                                        | NI    | NI     | NI    | NI | -1.26 | 4.56E-03 | -1.08 | 0.166    | -1.25 | 2.42E-04 | 3.22E-05 |
| 353 | P17174 | AATC   | Aspartate aminotransferase, cytoplasmic                           | Cytoplasm    | 2.6. Other Metabolic Processes                                            | 6.57  | 46.12  | 15.37 | 16 | -1.4  | 1.59E-04 | -1.22 | 1.99E-03 | -1.35 | 2.55E-04 | 7.74E-06 |
| 354 | P17174 | AATC   | Aspartate aminotransferase, cytoplasmic                           | Cytoplasm    | 2.6. Other Metabolic Processes                                            | 6.57  | 46.12  | 12.8  | 11 | -1.37 | 2.12E-04 | -1.24 | 3.64E-03 | -1.4  | 1.83E-05 | 7.64E-07 |
| 355 | P45379 | TNNT2  | Troponin T, cardiac muscle                                        | Cytoskeleton | 1. Structural and Contractile Proteins                                    | 4.94  | 35.79  | 10.7  | 7  | -1.13 | 0.537    | 1.24  | 0.557    | -1.36 | 0.0607   | 8.41E-03 |
| 356 | NP     | NP     | NP - Spot not present in the preparative gel                      | NP           | 11. NP - Spot not present in the preparative gel                          | NP    | NP     | NP    | NP | -1.17 | 0.101    | -1.22 | 0.0463   | -1.23 | 0.0158   | 1.25E-03 |
| 357 | A8MPP1 | DD11L  | Putative ATP-dependent RNA helicase DDX11-like protein            | Nucleus      | 2.6. Other Metabolic Processes                                            | 7.28  | 101.81 | 59*   | 7  | -1.28 | 0.0188   | -1.09 | 0.398    | 1.01  | 0.97     | 0.214    |
| 358 | NI     | NI     | NI - Spot not identified by MS                                    | NI           | 10. NI - Spot not identified by MS                                        | NI    | NI     | NI    | NI | -1.08 | 0.782    | 1.05  | 0.569    | 1.03  | 0.656    | 0.724    |
| 359 | O76021 | RL1D1  | Ribosomal L1 domain-containing protein 1                          | Nucleus      | 6. Transcription and Translation Processes                                | 10.13 | 54.97  | 60*   | 7  | -1.29 | 0.233    | 2.1   | 0.0447   | 1.09  | 0.4      | 0.0146   |
| 360 | O95299 | NDUAA  | NADH dehydrogenase [ubiquinone] 1 alpha subcomplex subunit 10     | Mitochondria | 2.4. Energy Metabolism - Oxidative Phosphorylation and Electron Transport | 6.87  | 37.15  | 7.9   | 10 | -1.28 | 9.14E-04 | -1.07 | 0.121    | -1.29 | 1.19E-04 | 6.17E-05 |
| 361 | P58499 | FAM3B  | Protein FAM3B                                                     | Secreted     | 9. Other Functions                                                        | 8.77  | 22.85  | 58*   | 6  | -1.11 | 0.151    | 1.06  | 0.547    | -1.02 | 0.762    | 9.76E-03 |
| 362 | Q92618 | ZNF516 | Zinc finger protein 516                                           | Nucleus      | 6. Transcription and Translation Processes                                | 9.02  | 124.29 | 50*   | 8  | -1.07 | 0.404    | 1.12  | 0.199    | 1.03  | 0.627    | 0.0723   |
| 363 | Q15056 | IF4H   | Eukaryotic translation initiation factor 4H                       | Cytoplasm    | 6. Transcription and Translation Processes                                | 6.92  | 27.25  | 50*   | 6  | -1.33 | 3.35E-04 | -1.05 | 0.417    | -1.27 | 1.88E-03 | 1.13E-03 |
| 364 | P63218 | GBG5   | Guanine nucleotide-binding protein G(I)/G(S)/G(O) subunit gamma-5 | Membrane     | 5. Cell Signaling                                                         | 9.90  | 6.84   | 38    |    | -1.87 | 0.0663   | -1.38 | 0.262    | -2.02 | 0.0272   | 0.0403   |
| 365 | P63218 | GBG5   | Guanine nucleotide-binding protein G(I)/G(S)/G(O) subunit gamma-5 | Membrane     | 5. Cell Signaling                                                         | 9.90  | 6.84   | 40    |    | -1.37 | 0.073    | -1.57 | 0.0211   | -1.69 | 3.26E-03 | 0.0196   |
| 366 | Q68D91 | MBLC2  | Metallo-beta-lactamase domain-containing protein 2                | Cytoplasm    | 9. Other Functions                                                        | 6.41  | 31.37  | 49    |    | 1.23  | 0.0637   | -1.01 | 0.97     | 1.15  | 0.102    | 2.13E-03 |
| 367 | NP     | NP     | NP - Spot not present in the preparative gel                      | NP           | 11. NP - Spot not present in the preparative gel                          | NP    | NP     | NP    | NP | -1.05 | 0.645    | -1.06 | 0.574    | -1.18 | 0.0698   | 0.142    |
| 368 | NP     | NP     | NP - Spot not present in the preparative gel                      | NP           | 11. NP - Spot not present in the preparative gel                          | NP    | NP     | NP    | NP | 1.05  | 0.452    | 1.01  | 0.748    | -1.03 | 0.68     | 0.62     |

|     |        |       |                                                                            |              |                                                               |      |        |       |    |       |          |       |          |       |          |          |
|-----|--------|-------|----------------------------------------------------------------------------|--------------|---------------------------------------------------------------|------|--------|-------|----|-------|----------|-------|----------|-------|----------|----------|
| 369 | NI     | NI    | NI - Spot not identified by MS                                             | NI           | 10. NI - Spot not identified by MS                            | NI   | NI     | NI    | NI | 1.04  | 0.579    | 1.12  | 0.499    | -1.1  | 0.504    | 0.488    |
| 370 | P16219 | ACADS | Short-chain specific acyl-CoA dehydrogenase, mitochondrial                 | Mitochondria | 2.2. Energy Metabolism - Lipid Metabolism/ $\beta$ -Oxidation | 6.15 | 41.72  | 54*   | 4  | -1.15 | 0.217    | 1.04  | 0.877    | -1.12 | 0.259    | 0.663    |
| 371 | P45379 | TNNT2 | Troponin T, cardiac muscle                                                 | Cytoskeleton | 1. Structural and Contractile Proteins                        | 4.94 | 35.79  | 6.65  | 5  | -1.37 | 0.114    | 1.52  | 0.0194   | 1.17  | 0.15     | 3.36E-04 |
| 372 | NP     | NP    | NP - Spot not present in the preparative gel                               | NP           | 11. NP - Spot not present in the preparative gel              | NP   | NP     | NP    | NP | -1.03 | 0.92     | -1.11 | 0.467    | 1.66  | 1.07E-03 | 5.72E-03 |
| 373 | P50213 | IDH3A | Isocitrate dehydrogenase [NAD] subunit alpha, mitochondrial                | Mitochondria | 2.3. Energy Metabolism - Tricarboxylic Acid Cycle             | 5.71 | 36.64  | 9.8   | 5  | 1.15  | 6.02E-03 | 1.18  | 0.0372   | 1.24  | 7.66E-03 | 0.0129   |
| 374 | NI     | NI    | NI - Spot not identified by MS                                             | NI           | 10. NI - Spot not identified by MS                            | NI   | NI     | NI    | NI | 1.29  | 1.21E-03 | -1.02 | 0.665    | 1.06  | 0.426    | 0.0132   |
| 375 | NI     | NI    | NI - Spot not identified by MS                                             | NI           | 10. NI - Spot not identified by MS                            | NI   | NI     | NI    | NI | -1.17 | 0.0553   | -1.03 | 0.687    | -1.16 | 0.0461   | 0.0112   |
| 376 | NI     | NI    | NI - Spot not identified by MS                                             | NI           | 10. NI - Spot not identified by MS                            | NI   | NI     | NI    | NI | 1.16  | 0.381    | 1.01  | 0.892    | 1.01  | 0.84     | 0.883    |
| 377 | P50213 | IDH3A | Isocitrate dehydrogenase [NAD] subunit alpha, mitochondrial                | Mitochondria | 2.3. Energy Metabolism - Tricarboxylic Acid Cycle             | 5.71 | 36.64  | 10.73 | 4  | 1.2   | 4.69E-03 | 1.12  | 0.321    | 1.22  | 0.0146   | 0.0525   |
| 378 | O00151 | PDL1  | PDZ and LIM domain protein 1                                               | Cytoskeleton | 1. Structural and Contractile Proteins                        | 6.55 | 35.94  | 6.66  | 5  | 1.15  | 0.316    | 1.06  | 0.829    | 1.3   | 5.93E-04 | 2.57E-03 |
| 379 | NI     | NI    | NI - Spot not identified by MS                                             | NI           | 10. NI - Spot not identified by MS                            | NI   | NI     | NI    | NI | -1.25 | 0.0136   | -1.07 | 0.409    | -1.21 | 0.0478   | 0.0303   |
| 380 | NP     | NP    | NP - Spot not present in the preparative gel                               | NP           | 11. NP - Spot not present in the preparative gel              | NP   | NP     | NP    | NP | 2.34  | 4.90E-05 | 1.26  | 4.70E-03 | 1.61  | 4.21E-05 | 2.67E-06 |
| 381 | P02689 | MYP2  | Myelin P2                                                                  | Cytoplasm    | 7. Transport and Transmembrane Transport                      | 9.84 | 14.78  | 57*   | 4  | -1.21 | 0.0292   | 1.13  | 0.263    | -1.02 | 0.77     | 0.0844   |
| 382 | P04083 | ANXA1 | Annexin A1 (Annexin I)                                                     | Nucleus      | 3. Stress Response and Apoptosis                              | 6.64 | 38.58  | 10.25 | 5  | 2.35  | 2.66E-06 | 1.14  | 0.06     | 1.56  | 1.76E-04 | 1.52E-07 |
| 383 | P40926 | MDHM  | Malate dehydrogenase, mitochondrial                                        | Mitochondria | 2.3. Energy Metabolism - Tricarboxylic Acid Cycle             | 8.54 | 33.00  | 7.67  | 6  | -1.22 | 0.0712   | 1.04  | 0.643    | -1.1  | 0.295    | 0.0631   |
| 384 | P04406 | G3P   | Glyceraldehyde-3-phosphate dehydrogenase (GAPDH)                           | Cytoplasm    | 2.1. Energy Metabolism - Glycolysis                           | 8.58 | 35.92  | 8.72  | 6  | -1    | 0.993    | 1.14  | 0.178    | -1.05 | 0.516    | 0.317    |
| 385 | P62140 | PP1B  | Serine/threonine-protein phosphatase PP1-beta catalytic subunit            | Cytoplasm    | 9. Other Functions                                            | 5.85 | 37.06  | 7.26  | 5  | 1.05  | 0.443    | 1.08  | 0.151    | 1.1   | 0.0738   | 0.561    |
| 386 | P07355 | ANXA2 | Annexin A2 (Annexin II)                                                    | Secreted     | 9. Other Functions                                            | 7.56 | 38.47  | 15.51 | 14 | 1.7   | 3.42E-04 | 1.23  | 0.0581   | 1.26  | 0.0464   | 6.03E-03 |
| 387 | P07355 | ANXA2 | Annexin A2 (Annexin II)                                                    | Secreted     | 9. Other Functions                                            | 7.56 | 38.47  | 108*  | 6  | 1.7   | 8.78E-05 | 1.17  | 0.0663   | 1.29  | 5.49E-03 | 3.74E-03 |
| 388 | Q14894 | CRYM  | Mu-crystallin homolog                                                      | Cytoplasm    | 2.6. Other Metabolic Processes                                | 5.06 | 33.78  | 27.47 | 5  | 1.21  | 0.115    | 1.14  | 0.0151   | 1.27  | 0.0693   | 2.75E-03 |
| 389 | P04406 | G3P   | Glyceraldehyde-3-phosphate dehydrogenase (GAPDH)                           | Cytoplasm    | 2.1. Energy Metabolism - Glycolysis                           | 8.58 | 35.92  | 7.4   | 3  | 1.23  | 2.00E-03 | 1.16  | 0.0586   | 1.2   | 0.0313   | 3.84E-03 |
| 390 | P04406 | G3P   | Glyceraldehyde-3-phosphate dehydrogenase (GAPDH)                           | Cytoplasm    | 2.1. Energy Metabolism - Glycolysis                           | 8.58 | 35.92  | 8.07  | 3  | 1.27  | 3.69E-03 | 1.19  | 0.0254   | 1.12  | 0.0911   | 2.11E-03 |
| 391 | P04406 | G3P   | Glyceraldehyde-3-phosphate dehydrogenase (GAPDH)                           | Cytoplasm    | 2.1. Energy Metabolism - Glycolysis                           | 8.58 | 35.92  | 7.45  | 3  | 1.04  | 0.601    | 1.13  | 0.168    | -1.01 | 0.932    | 0.205    |
| 392 | P47755 | CAZA2 | F-actin capping protein subunit alpha-2 (CapZ alpha-2)                     | Cytoskeleton | 1. Structural and Contractile Proteins                        | 5.58 | 32.82  | 14.21 | 7  | -1.1  | 0.069    | -1.02 | 0.678    | -1.12 | 8.57E-03 | 0.0152   |
| 393 | Q6P3V2 | Z585A | Zinc finger protein 585A                                                   | Nucleus      | 6. Transcription and Translation Processes                    | 9.26 | 87.97  | 53*   | 7  | 1.06  | 0.641    | 1.04  | 0.798    | 1.14  | 0.191    | 5.05E-04 |
| 394 | NI     | NI    | NI - Spot not identified by MS                                             | NI           | 10. NI - Spot not identified by MS                            | NI   | NI     | NI    | NI | 1.48  | 2.32E-05 | 1.25  | 2.99E-03 | 1.28  | 4.59E-04 | 3.80E-04 |
| 395 | P04406 | G3P   | Glyceraldehyde-3-phosphate dehydrogenase (GAPDH)                           | Cytoplasm    | 2.1. Energy Metabolism - Glycolysis                           | 8.58 | 35.92  | 7.15  | 4  | 1.09  | 0.25     | 1.14  | 0.0896   | 1.03  | 0.616    | 3.93E-03 |
| 396 | P04406 | G3P   | Glyceraldehyde-3-phosphate dehydrogenase (GAPDH)                           | Cytoplasm    | 2.1. Energy Metabolism - Glycolysis                           | 8.58 | 35.92  | 58*   | 5  | 1.13  | 0.0673   | 1.15  | 0.0929   | 1.02  | 0.722    | 0.018    |
| 397 | P04406 | G3P   | Glyceraldehyde-3-phosphate dehydrogenase (GAPDH)                           | Cytoplasm    | 2.1. Energy Metabolism - Glycolysis                           | 8.58 | 35.92  | 27.47 | 5  | 1     | 0.938    | 1.08  | 0.485    | -1.05 | 0.446    | 0.246    |
| 398 | NI     | NI    | NI - Spot not identified by MS                                             | NI           | 10. NI - Spot not identified by MS                            | NI   | NI     | NI    | NI | 1.19  | 9.56E-03 | 1.16  | 0.0219   | 1.1   | 0.104    | 1.75E-03 |
| 399 | Q96L73 | NSD1  | Histone-lysine N-methyltransferase, H3 lysine-36 and H4 lysine-20 specific | Nucleus      | 6. Transcription and Translation Processes                    | 8.40 | 296.65 | 57*   | 9  | 1.1   | 0.264    | 1.17  | 0.108    | 1.03  | 0.747    | 0.31     |
| 400 | NP     | NP    | NP - Spot not present in the preparative gel                               | NP           | 11. NP - Spot not present in the preparative gel              | NP   | NP     | NP    | NP | -1.21 | 3.07E-03 | -1.06 | 0.364    | -1.15 | 0.0445   | 4.02E-03 |
| 401 | NP     | NP    | NP - Spot not present in the preparative gel                               | NP           | 11. NP - Spot not present in the preparative gel              | NP   | NP     | NP    | NP | 1.1   | 0.389    | 1.13  | 0.291    | 1.08  | 0.286    | 0.413    |
| 402 | NI     | NI    | NI - Spot not identified by MS                                             | NI           | 10. NI - Spot not identified by MS                            | NI   | NI     | NI    | NI | -1.09 | 0.241    | 1.06  | 0.715    | -1.05 | 0.494    | 0.113    |
| 403 | NI     | NI    | NI - Spot not identified by MS                                             | NI           | 10. NI - Spot not identified by MS                            | NI   | NI     | NI    | NI | 1.02  | 0.739    | -1.03 | 0.611    | -1.02 | 0.79     | 0.303    |
| 404 | NI     | NI    | NI - Spot not identified by MS                                             | NI           | 10. NI - Spot not identified by MS                            | NI   | NI     | NI    | NI | 1.03  | 0.5      | 1.02  | 0.661    | 1.14  | 0.0171   | 0.0187   |
| 405 | Q9Y2K2 | QSK   | Serine/threonine-protein kinase QSK                                        | Cytoplasm    | 9. Other Functions                                            | 6.22 | 139.98 | 56*   | 7  | -1.27 | 0.506    | -1.21 | 0.649    | -1.02 | 0.894    | 0.759    |

|     |        |        |                                                                 |              |                                                               |      |        |       |    |       |          |       |          |       |          |          |
|-----|--------|--------|-----------------------------------------------------------------|--------------|---------------------------------------------------------------|------|--------|-------|----|-------|----------|-------|----------|-------|----------|----------|
| 406 | P45379 | TNNT2  | Troponin T, cardiac muscle                                      | Cytoskeleton | 1. Structural and Contractile Proteins                        | 4.94 | 35.79  | 64*   | 4  | -1.65 | 1.92E-03 | -1.39 | 0.0668   | -1.58 | 7.45E-03 | 5.09E-04 |
| 407 | NI     | NI     | NI - Spot not identified by MS                                  | NI           | 10. NI - Spot not identified by MS                            | NI   | NI     | NI    | NI | -1.31 | 0.0637   | -1.32 | 0.0476   | -1.16 | 0.223    | 4.45E-04 |
| 408 | NP     | NP     | NP - Spot not present in the preparative gel                    | NP           | 11. NP - Spot not present in the preparative gel              | NP   | NP     | NP    | NP | 1.37  | 0.0479   | 1.02  | 0.685    | 1.14  | 0.167    | 0.0902   |
| 409 | P07355 | ANXA2  | Annexin A2 (Annexin II)                                         | Secreted     | 9. Other Functions                                            | 7.56 | 38.47  | 51*   | 3  | 1.62  | 1.78E-03 | 1.16  | 0.0335   | 1.35  | 1.76E-03 | 3.00E-03 |
| 410 | P22626 | ROA2   | Heterogeneous nuclear ribonucleoproteins A2/B1                  | Nucleus      | 2.6. Other Metabolic Processes                                | 8.97 | 37.43  | 7.52  | 4  | -1.27 | 2.47E-03 | -1.09 | 0.232    | -1.17 | 0.0337   | 3.11E-03 |
| 411 | Q9UBT7 | CTNL1  | Alpha-catulin                                                   | Cytoskeleton | 1. Structural and Contractile Proteins                        | 6.22 | 81.90  | 53*   | 6  | -1.05 | 0.467    | -1.06 | 0.398    | 1.01  | 0.819    | 0.557    |
| 412 | NP     | NP     | NP - Spot not present in the preparative gel                    | NP           | 11. NP - Spot not present in the preparative gel              | NP   | NP     | NP    | NP | -1.02 | 0.854    | -1.1  | 0.266    | 1.01  | 0.84     | 0.233    |
| 413 | NP     | NP     | NP - Spot not present in the preparative gel                    | NP           | 11. NP - Spot not present in the preparative gel              | NP   | NP     | NP    | NP | -1.22 | 2.11E-03 | 1.09  | 0.291    | -1.12 | 0.0932   | 0.0496   |
| 414 | NI     | NI     | NI - Spot not identified by MS                                  | NI           | 10. NI - Spot not identified by MS                            | NI   | NI     | NI    | NI | -1.17 | 0.0813   | -1.14 | 0.0733   | -1.22 | 0.0178   | 0.0564   |
| 415 | P11177 | ODPB   | Pyruvate dehydrogenase E1 component subunit beta, mitochondrial | Mitochondria | 2.1. Energy Metabolism - Glycolysis                           | 5.38 | 35.90  | 59*   | 6  | -1.12 | 0.0464   | 1.01  | 0.909    | -1.07 | 0.134    | 0.177    |
| 416 | P40926 | MDHM   | Malate dehydrogenase, mitochondrial                             | Mitochondria | 2.3. Energy Metabolism - Tricarboxylic Acid Cycle             | 8.54 | 33.00  | 10.62 | 9  | -1.28 | 3.27E-03 | 1.02  | 0.763    | -1.14 | 0.107    | 8.55E-03 |
| 417 | P40926 | MDHM   | Malate dehydrogenase, mitochondrial                             | Mitochondria | 2.3. Energy Metabolism - Tricarboxylic Acid Cycle             | 8.54 | 33.00  | 10.03 | 6  | -1.22 | 5.87E-03 | 1.05  | 0.464    | -1.1  | 0.195    | 0.0169   |
| 418 | P11177 | ODPB   | Pyruvate dehydrogenase E1 component subunit beta, mitochondrial | Mitochondria | 2.1. Energy Metabolism - Glycolysis                           | 5.38 | 35.90  | 57*   | 6  | -1.1  | 0.0645   | -1.01 | 0.931    | -1.05 | 0.343    | 0.333    |
| 419 | P40926 | MDHM   | Malate dehydrogenase, mitochondrial                             | Mitochondria | 2.3. Energy Metabolism - Tricarboxylic Acid Cycle             | 8.54 | 33.00  | 12.3  | 9  | -1.23 | 9.22E-03 | -1.02 | 0.763    | -1.16 | 0.0173   | 5.75E-03 |
| 420 | A6NNV3 | W19L5  | Putative WBSR19-like protein 5                                  | Other        | 9. Other Functions                                            | 8.38 | 37.50  | 58*   | 4  | -1.15 | 0.238    | -1.4  | 7.02E-03 | -1.02 | 0.694    | 1.48E-04 |
| 421 | P22626 | ROA2   | Heterogeneous nuclear ribonucleoproteins A2/B1                  | Nucleus      | 2.6. Other Metabolic Processes                                | 8.97 | 37.43  | 8.12  | 4  | -1.23 | 0.0127   | 1.02  | 0.758    | -1.16 | 0.021    | 1.55E-03 |
| 422 | P45379 | TNNT2  | Troponin T, cardiac muscle                                      | Cytoskeleton | 1. Structural and Contractile Proteins                        | 4.94 | 35.79  | 59*   | 4  | -1.48 | 0.0391   | -1.63 | 0.0319   | -1.36 | 0.101    | 3.91E-04 |
| 423 | NP     | NP     | NP - Spot not present in the preparative gel                    | NP           | 11. NP - Spot not present in the preparative gel              | NP   | NP     | NP    | NP | -1.22 | 0.0223   | 1.08  | 0.334    | -1.12 | 0.0924   | 3.61E-04 |
| 424 | P23276 | KELL   | Kell blood group glycoprotein                                   | Membrane     | 9. Other Functions                                            | 8.09 | 82.82  | 54*   | 7  | -1.21 | 2.11E-03 | -1.04 | 0.426    | -1.19 | 0.0108   | 1.26E-03 |
| 425 | P40925 | MDHC   | Malate dehydrogenase, cytoplasmic                               | Cytoplasm    | 2.6. Other Metabolic Processes                                | 6.89 | 36.29  | 7.65  | 6  | -1.31 | 1.26E-03 | -1.09 | 0.205    | -1.26 | 7.53E-03 | 1.67E-03 |
| 426 | P40925 | MDHC   | Malate dehydrogenase, cytoplasmic                               | Cytoplasm    | 2.6. Other Metabolic Processes                                | 6.89 | 36.29  | 50*   | 3  | -1.07 | 0.258    | 1.02  | 0.8      | 1     | 0.966    | 0.372    |
| 427 | P21796 | VDAC1  | Voltage-dependent anion-selective channel protein 1             | Mitochondria | 7. Transport and Transmembrane Transport                      | 8.63 | 30.64  | 9.3   | 6  | -1.06 | 0.4      | 1.11  | 0.163    | 1.07  | 0.365    | 0.327    |
| 428 | NP     | NP     | NP - Spot not present in the preparative gel                    | NP           | 11. NP - Spot not present in the preparative gel              | NP   | NP     | NP    | NP | -1.38 | 0.0469   | -1.19 | 0.248    | -1.32 | 0.0631   | 0.0121   |
| 429 | Q16836 | HCDH   | Hydroxyacyl-coenzyme A dehydrogenase, mitochondrial             | Mitochondria | 2.2. Energy Metabolism - Lipid Metabolism/ $\beta$ -Oxidation | 8.38 | 32.84  | 54*   | 3  | -1.31 | 1.19E-03 | 1.04  | 0.59     | -1.14 | 0.0604   | 1.18E-03 |
| 430 | Q16836 | HCDH   | Hydroxyacyl-coenzyme A dehydrogenase, mitochondrial             | Mitochondria | 2.2. Energy Metabolism - Lipid Metabolism/ $\beta$ -Oxidation | 8.38 | 32.84  | 64*   | 4  | -1.28 | 2.73E-03 | 1.08  | 0.389    | -1.05 | 0.457    | 3.11E-03 |
| 431 | NP     | NP     | NP - Spot not present in the preparative gel                    | NP           | 11. NP - Spot not present in the preparative gel              | NP   | NP     | NP    | NP | -1.15 | 0.312    | -1.07 | 0.679    | 1.05  | 0.66     | 0.589    |
| 432 | NI     | NI     | NI - Spot not identified by MS                                  | NI           | 10. NI - Spot not identified by MS                            | NI   | NI     | NI    | NI | -1.17 | 0.0251   | -1.02 | 0.69     | -1.14 | 0.0266   | 0.0989   |
| 433 | Q16836 | HCDH   | Hydroxyacyl-coenzyme A dehydrogenase, mitochondrial             | Mitochondria | 2.2. Energy Metabolism - Lipid Metabolism/ $\beta$ -Oxidation | 8.38 | 32.84  | 69*   | 5  | -1.25 | 2.10E-03 | -1.01 | 0.988    | -1.04 | 0.522    | 8.70E-04 |
| 434 | Q16352 | AIX    | Alpha-internexin                                                | Cytoplasm    | 1. Structural and Contractile Proteins                        | 5.34 | 55.39  | 52*   | 5  | -1.32 | 2.47E-03 | -1.02 | 0.734    | -1.36 | 1.52E-05 | 9.27E-05 |
| 435 | Q9NPC6 | MYOZ2  | Myozenin-2                                                      | Cytoskeleton | 1. Structural and Contractile Proteins                        | 7.86 | 29.90  | 6.93  | 5  | -1.16 | 0.0463   | 1.04  | 0.483    | -1.19 | 2.42E-03 | 1.69E-03 |
| 436 | NP     | NP     | NP - Spot not present in the preparative gel                    | NP           | 11. NP - Spot not present in the preparative gel              | NP   | NP     | NP    | NP | -1.19 | 0.161    | -1.02 | 0.745    | -1.16 | 0.129    | 0.42     |
| 437 | O75208 | COQ9   | Ubiquinone biosynthesis protein COQ9, mitochondrial             | Mitochondria | 2.6. Other Metabolic Processes                                | 5.01 | 30.94  | 51*   | 3  | -1.09 | 0.137    | 1.01  | 0.923    | 1.22  | 3.16E-03 | 1.56E-09 |
| 438 | Q6WCQ1 | MPRIIP | Myosin phosphatase Rho-interacting protein                      | Cytoskeleton | 1. Structural and Contractile Proteins                        | 5.89 | 116.40 | 53*   | 5  | -1.05 | 0.493    | -1.02 | 0.795    | 1.05  | 0.458    | 7.50E-06 |
| 439 | NP     | NP     | NP - Spot not present in the preparative gel                    | NP           | 11. NP - Spot not present in the preparative gel              | NP   | NP     | NP    | NP | 1.21  | 0.0654   | 1.07  | 0.393    | 1.1   | 0.545    | 0.239    |
| 440 | Q9ULU4 | PKCB1  | Protein kinase C-binding protein 1                              | Cytoplasm    | 5. Cell Signaling                                             | 6.83 | 131.69 | 56*   | 7  | -1.15 | 0.0967   | 1.02  | 0.691    | -1.1  | 0.275    | 7.96E-03 |
| 441 | NI     | NI     | NI - Spot not identified by MS                                  | NI           | 10. NI - Spot not identified by MS                            | NI   | NI     | NI    | NI | -1.15 | 0.0583   | 1.07  | 0.23     | -1.05 | 0.385    | 4.78E-05 |
| 442 | Q6Q0C0 | TRAF7  | E3 ubiquitin-protein ligase TRAF7                               | Cytoplasm    | 8. Proteasome-Ubiquitin Process                               | 6.77 | 74.61  | 53*   | 7  | -1.1  | 0.17     | 1     | 0.881    | -1.06 | 0.413    | 0.649    |

|     |        |       |                                                                                       |              |                                                       |       |        |       |    |       |          |       |          |       |          |          |
|-----|--------|-------|---------------------------------------------------------------------------------------|--------------|-------------------------------------------------------|-------|--------|-------|----|-------|----------|-------|----------|-------|----------|----------|
| 443 | NP     | NP    | NP - Spot not present in the preparative gel                                          | NP           | 11. NP - Spot not present in the preparative gel      | NP    | NP     | NP    | NP | -1.08 | 0.714    | -1.14 | 0.448    | 1.02  | 0.81     | 0.866    |
| 444 | NP     | NP    | NP - Spot not present in the preparative gel                                          | NP           | 11. NP - Spot not present in the preparative gel      | NP    | NP     | NP    | NP | -1.18 | 0.273    | 1.08  | 0.727    | -1.04 | 0.934    | 0.0637   |
| 445 | NI     | NI    | NI - Spot not identified by MS                                                        | NI           | 10. NI - Spot not identified by MS                    | NI    | NI     | NI    | NI | -1.36 | 2.14E-03 | 1.03  | 0.7      | -1.26 | 3.29E-03 | 1.53E-05 |
| 446 | NI     | NI    | NI - Spot not identified by MS                                                        | NI           | 10. NI - Spot not identified by MS                    | NI    | NI     | NI    | NI | 1.16  | 0.0282   | 1.18  | 0.0805   | 1.14  | 0.0557   | 0.243    |
| 447 | Q16836 | HCDH  | Hydroxyacyl-coenzyme A dehydrogenase, mitochondrial                                   | Mitochondria | 2.2. Energy Metabolism - Lipid Metabolism/β-Oxidation | 8.38  | 32.84  | 56*   | 4  | -1.47 | 2.04E-03 | 1.04  | 0.61     | -1.27 | 0.0268   | 2.39E-04 |
| 448 | P02144 | MYG   | Myoglobin                                                                             | Cytoplasm    | 9. Other Functions                                    | 7.29  | 17.05  | 66*   | 4  | -1.18 | 0.0923   | 1.09  | 0.301    | -1.08 | 0.351    | 0.0264   |
| 449 | Q9NPC6 | MYOZ2 | Myozenin-2                                                                            | Cytoskeleton | 1. Structural and Contractile Proteins                | 7.86  | 29.90  | 68*   | 6  | -1.12 | 0.228    | 1.08  | 0.355    | 1.01  | 0.883    | 0.108    |
| 450 | NP     | NP    | NP - Spot not present in the preparative gel                                          | NP           | 11. NP - Spot not present in the preparative gel      | NP    | NP     | NP    | NP | -1.46 | 0.0141   | -1.05 | 0.661    | -1.27 | 0.0251   | 7.95E-03 |
| 451 | Q9NPC6 | MYOZ2 | Myozenin-2                                                                            | Cytoskeleton | 1. Structural and Contractile Proteins                | 7.86  | 29.90  | 61*   | 5  | -1.21 | 0.0579   | 1.1   | 0.18     | 1.05  | 0.355    | 4.97E-03 |
| 452 | NP     | NP    | NP - Spot not present in the preparative gel                                          | NP           | 11. NP - Spot not present in the preparative gel      | NP    | NP     | NP    | NP | -1.02 | 0.741    | 1.22  | 3.52E-03 | 1.09  | 0.228    | 3.31E-04 |
| 453 | Q16698 | DECR  | 2,4-dienoyl-CoA reductase, mitochondrial                                              | Mitochondria | 2.2. Energy Metabolism - Lipid Metabolism/β-Oxidation | 8.79  | 32.15  | 6.61  | 5  | -1.27 | 0.0152   | 1.07  | 0.501    | -1.26 | 4.59E-03 | 1.76E-03 |
| 454 | Q16698 | DECR  | 2,4-dienoyl-CoA reductase, mitochondrial                                              | Mitochondria | 2.2. Energy Metabolism - Lipid Metabolism/β-Oxidation | 8.79  | 32.15  | 25.21 | 3  | -1.47 | 3.83E-04 | -1.01 | 0.906    | -1.34 | 2.52E-03 | 1.11E-03 |
| 455 | NP     | NP    | NP - Spot not present in the preparative gel                                          | NP           | 11. NP - Spot not present in the preparative gel      | NP    | NP     | NP    | NP | -1.24 | 3.81E-03 | -1.02 | 0.679    | -1.24 | 1.71E-03 | 5.69E-04 |
| 456 | P08758 | ANXA5 | Annexin A5 (Annexin V)                                                                | Cytoplasm    | 3. Stress Response and Apoptosis                      | 4.94  | 35.81  | 61*   | 6  | 2.49  | 1.58E-05 | 1.42  | 0.0134   | 1.83  | 5.08E-05 | 1.03E-07 |
| 457 | P08758 | ANXA5 | Annexin A5 (Annexin V)                                                                | Cytoplasm    | 3. Stress Response and Apoptosis                      | 4.94  | 35.81  | 10.98 | 5  | 2.53  | 5.71E-05 | 1.43  | 0.0299   | 1.88  | 7.73E-05 | 7.30E-07 |
| 458 | NI     | NI    | NI - Spot not identified by MS                                                        | NI           | 10. NI - Spot not identified by MS                    | NI    | NI     | NI    | NI | 1.15  | 0.0607   | 1.12  | 0.203    | 1.11  | 0.136    | 0.261    |
| 459 | NP     | NP    | NP - Spot not present in the preparative gel                                          | NP           | 11. NP - Spot not present in the preparative gel      | NP    | NP     | NP    | NP | -1.14 | 0.0372   | 1.26  | 2.05E-03 | 1.01  | 0.978    | 1.11E-03 |
| 460 | NP     | NP    | NP - Spot not present in the preparative gel                                          | NP           | 11. NP - Spot not present in the preparative gel      | NP    | NP     | NP    | NP | 1.3   | 0.147    | 1.06  | 0.43     | 1.25  | 0.0157   | 0.0229   |
| 461 | P51451 | BLK   | Tyrosine-protein kinase BLK                                                           | Cytoplasm    | 5. Cell Signaling                                     | 8.02  | 57.58  | 58*   | 9  | 1.86  | 1.40E-03 | -1.27 | 0.132    | 1.1   | 0.514    | 6.14E-05 |
| 462 | NI     | NI    | NI - Spot not identified by MS                                                        | NI           | 10. NI - Spot not identified by MS                    | NI    | NI     | NI    | NI | -1.43 | 5.41E-03 | -1.07 | 0.573    | -1.25 | 0.0381   | 0.0118   |
| 463 | P31751 | AKT2  | RAC-beta serine/threonine-protein kinase                                              | Cytoplasm    | 3. Stress Response and Apoptosis                      | 5.98  | 55.77  | 52*   | 7  | -4.4  | 1.44E-03 | -2.62 | 0.0172   | -3.67 | 3.10E-03 | 2.31E-04 |
| 464 | NI     | NI    | NI - Spot not identified by MS                                                        | NI           | 10. NI - Spot not identified by MS                    | NI    | NI     | NI    | NI | -1.06 | 0.303    | 1.1   | 0.494    | -1.09 | 0.0746   | 0.466    |
| 465 | Q9Y5T4 | DJC15 | DnaJ homolog subfamily C member 15                                                    | Membrane     | 3. Stress Response and Apoptosis                      | 10.08 | 16.38  | 58*   | 4  | -1.12 | 0.152    | 1.31  | 0.0406   | -1.05 | 0.502    | 0.0438   |
| 466 | Q13011 | ECH1  | Delta(3,5)-Delta(2,4)-dienoyl-CoA isomerase, mitochondrial                            | Mitochondria | 2.2. Energy Metabolism - Lipid Metabolism/β-Oxidation | 5.99  | 32.21  | 9.06  | 4  | -1.09 | 0.321    | 1.12  | 0.421    | -1.07 | 0.373    | 0.255    |
| 467 | Q13011 | ECH1  | Delta(3,5)-Delta(2,4)-dienoyl-CoA isomerase, mitochondrial                            | Mitochondria | 2.2. Energy Metabolism - Lipid Metabolism/β-Oxidation | 5.99  | 32.21  | 12    | 5  | 1.19  | 0.57     | 1.27  | 0.753    | 1.77  | 0.102    | 0.0377   |
| 468 | P62258 | 1433E | 14-3-3 protein epsilon                                                                | Cytoplasm    | 5. Cell Signaling                                     | 4.63  | 29.17  | 26.88 | 5  | 1.32  | 0.0152   | 1.04  | 0.544    | 1.27  | 0.0112   | 7.80E-05 |
| 469 | P25786 | PSA1  | Proteasome subunit alpha type-1                                                       | Cytoplasm    | 8. Proteasome-Ubiquitin Process                       | 6.15  | 29.56  | 62*   | 4  | 1.14  | 0.0449   | -1    | 0.941    | 1.05  | 0.269    | 0.0246   |
| 470 | P07339 | CATD  | Cathepsin D                                                                           | Cytoplasm    | 2.6. Other Metabolic Processes                        | 5.60  | 37.85  | 58*   | 4  | 1.41  | 4.12E-04 | 1.27  | 3.25E-03 | 1.59  | 1.76E-03 | 1.88E-03 |
| 471 | NI     | NI    | NI - Spot not identified by MS                                                        | NI           | 10. NI - Spot not identified by MS                    | NI    | NI     | NI    | NI | 1.15  | 0.121    | 1.33  | 1.17E-03 | 1.62  | 6.55E-04 | 1.72E-04 |
| 472 | P49588 | SYAC  | Alanyl-tRNA synthetase, cytoplasmic                                                   | Cytoplasm    | 6. Transcription and Translation Processes            | 5.34  | 106.81 | 22.09 | 5  | 1.66  | 4.42E-04 | -1.05 | 0.642    | 1.01  | 0.814    | 6.02E-05 |
| 473 | P17931 | LEG3  | Galectin-3                                                                            | Nucleus      | 4. Immune Response                                    | 8.60  | 26.02  | 8.17  | 4  | 1.37  | 7.41E-04 | 1.2   | 0.0212   | 1.14  | 0.18     | 0.0862   |
| 474 | P07339 | CATD  | Cathepsin D                                                                           | Cytoplasm    | 2.6. Other Metabolic Processes                        | 5.60  | 37.85  | 58*   | 4  | 1.19  | 0.0861   | 1.15  | 0.0976   | 1.27  | 0.012    | 0.134    |
| 475 | NI     | NI    | NI - Spot not identified by MS                                                        | NI           | 10. NI - Spot not identified by MS                    | NI    | NI     | NI    | NI | 1.23  | 0.0793   | 1.06  | 0.566    | 1.27  | 0.0838   | 8.93E-03 |
| 476 | NI     | NI    | NI - Spot not identified by MS                                                        | NI           | 10. NI - Spot not identified by MS                    | NI    | NI     | NI    | NI | 1.09  | 0.0614   | 1.1   | 0.0614   | 1.2   | 0.0132   | 0.0834   |
| 477 | P61981 | 1433G | 14-3-3 protein gamma                                                                  | Cytoplasm    | 5. Cell Signaling                                     | 4.80  | 28.30  | 85*   | 6  | 1.24  | 0.0126   | 1.08  | 0.314    | 1.18  | 0.0388   | 0.0196   |
| 478 | NP     | NP    | NP - Spot not present in the preparative gel                                          | NP           | 11. NP - Spot not present in the preparative gel      | NP    | NP     | NP    | NP | 1.25  | 0.035    | 1.09  | 0.397    | -1.01 | 0.916    | 9.68E-04 |
| 479 | Q06323 | PSME1 | Proteasome activator complex subunit 1 (Interferon gamma up-regulated 1-5111 protein) | Cytoplasm    | 8. Proteasome-Ubiquitin Process                       | 5.78  | 28.72  | 8.55  | 3  | 1.67  | 2.06E-08 | -1.07 | 0.118    | 1.02  | 0.682    | 3.60E-07 |

|     |        |       |                                                       |              |                                                                           |      |       |       |    |       |          |       |          |       |          |          |
|-----|--------|-------|-------------------------------------------------------|--------------|---------------------------------------------------------------------------|------|-------|-------|----|-------|----------|-------|----------|-------|----------|----------|
| 480 | NP     | NP    | NP - Spot not present in the preparative gel          | NP           | 11. NP - Spot not present in the preparative gel                          | NP   | NP    | NP    | NP | -1.32 | 0.0279   | -1.48 | 4.36E-05 | 1.02  | 0.847    | 3.48E-05 |
| 481 | NI     | NI    | NI - Spot not identified by MS                        | NI           | 10. NI - Spot not identified by MS                                        | NI   | NI    | NI    | NI | 2.17  | 1.77E-04 | 1.28  | 1.35E-03 | 1.49  | 1.27E-05 | 3.31E-06 |
| 482 | NI     | NI    | NI - Spot not identified by MS                        | NI           | 10. NI - Spot not identified by MS                                        | NI   | NI    | NI    | NI | 1.24  | 0.0182   | 1.04  | 0.577    | 1.04  | 0.752    | 0.0644   |
| 483 | NI     | NI    | NI - Spot not identified by MS                        | NI           | 10. NI - Spot not identified by MS                                        | NI   | NI    | NI    | NI | -1.05 | 0.511    | 1.14  | 0.041    | 1     | 0.871    | 0.0117   |
| 484 | NI     | NI    | NI - Spot not identified by MS                        | NI           | 10. NI - Spot not identified by MS                                        | NI   | NI    | NI    | NI | 1.71  | 1.20E-03 | 1.12  | 0.133    | 1.41  | 3.07E-04 | 5.37E-06 |
| 485 | P00915 | CAH1  | Carbonic anhydrase 1                                  | Cytoplasm    | 2.6. Other Metabolic Processes                                            | 6.63 | 28.74 | 8.24  | 5  | 1.85  | 0.0546   | 1.22  | 0.107    | 1.06  | 0.559    | 0.0403   |
| 486 | P63104 | 1433Z | 14-3-3 protein zeta/delta                             | Cytoplasm    | 5. Cell Signaling                                                         | 4.73 | 27.75 | 7.73  | 5  | 1.64  | 9.29E-04 | 1.05  | 0.426    | 1.36  | 3.78E-03 | 1.70E-05 |
| 487 | NI     | NI    | NI - Spot not identified by MS                        | NI           | 10. NI - Spot not identified by MS                                        | NI   | NI    | NI    | NI | -1.28 | 0.246    | -1.47 | 0.075    | -1.42 | 0.0985   | 0.0458   |
| 488 | NI     | NI    | NI - Spot not identified by MS                        | NI           | 10. NI - Spot not identified by MS                                        | NI   | NI    | NI    | NI | 4.95  | 8.90E-03 | 1.36  | 0.0122   | 1.95  | 9.36E-03 | 2.15E-03 |
| 489 | NI     | NI    | NI - Spot not identified by MS                        | NI           | 10. NI - Spot not identified by MS                                        | NI   | NI    | NI    | NI | 1.2   | 0.234    | -1.04 | 0.906    | -1.02 | 0.962    | 0.284    |
| 490 | NI     | NI    | NI - Spot not identified by MS                        | NI           | 10. NI - Spot not identified by MS                                        | NI   | NI    | NI    | NI | -1.13 | 0.397    | -1.17 | 0.255    | -1.11 | 0.397    | 0.0481   |
| 491 | NP     | NP    | NP - Spot not present in the preparative gel          | NP           | 11. NP - Spot not present in the preparative gel                          | NP   | NP    | NP    | NP | 1.19  | 0.323    | -1.17 | 0.168    | 1.03  | 0.951    | 0.117    |
| 492 | NI     | NI    | NI - Spot not identified by MS                        | NI           | 10. NI - Spot not identified by MS                                        | NI   | NI    | NI    | NI | -1.11 | 0.153    | -1.14 | 0.0579   | -1.16 | 0.0544   | 0.101    |
| 493 | NI     | NI    | NI - Spot not identified by MS                        | NI           | 10. NI - Spot not identified by MS                                        | NI   | NI    | NI    | NI | 1.55  | 1.91E-04 | 1.04  | 0.471    | 1.26  | 1.63E-03 | 1.13E-06 |
| 494 | Q96P53 | WDFY2 | WD repeat and FYVE domain-containing protein 2        | Nucleus      | 9. Other Functions                                                        | 6.46 | 45.15 | 56*   | 4  | -1.32 | 1.24E-04 | -1.11 | 0.0295   | -1.38 | 3.89E-07 | 4.90E-08 |
| 495 | P55851 | UCP2  | Mitochondrial uncoupling protein 2                    | Mitochondria | 7. Transport and Transmembrane Transport                                  | 9.74 | 33.23 | 46*   | 5  | -1.9  | 4.23E-04 | -1.38 | 0.0668   | -2.3  | 1.64E-05 | 1.80E-04 |
| 496 | NP     | NP    | NP - Spot not present in the preparative gel          | NP           | 11. NP - Spot not present in the preparative gel                          | NP   | NP    | NP    | NP | 1.21  | 0.0665   | 1.13  | 0.287    | 1.13  | 0.11     | 0.369    |
| 497 | P15259 | PGAM2 | Phosphoglycerate mutase 2                             | Cytoplasm    | 2.1. Energy Metabolism - Glycolysis                                       | 9.00 | 28.63 | 7.82  | 9  | -1.79 | 5.32E-06 | -1.26 | 0.0277   | -1.89 | 7.14E-08 | 6.31E-10 |
| 498 | P15259 | PGAM2 | Phosphoglycerate mutase 2                             | Cytoplasm    | 2.1. Energy Metabolism - Glycolysis                                       | 9.00 | 28.63 | 71*   | 4  | -1.65 | 1.12E-05 | -1.19 | 0.0648   | -1.69 | 1.06E-07 | 8.37E-09 |
| 499 | P19429 | TNNI3 | Troponin I, cardiac muscle                            | Cytoskeleton | 1. Structural and Contractile Proteins                                    | 9.87 | 23.88 | 59*   | 5  | 1.33  | 8.55E-03 | 1.41  | 1.94E-03 | 1.44  | 6.31E-04 | 6.69E-05 |
| 500 | NI     | NI    | NI - Spot not identified by MS                        | NI           | 10. NI - Spot not identified by MS                                        | NI   | NI    | NI    | NI | -1.72 | 0.0482   | -1.16 | 0.651    | 1.06  | 0.573    | 3.81E-03 |
| 501 | NI     | NI    | NI - Spot not identified by MS                        | NI           | 10. NI - Spot not identified by MS                                        | NI   | NI    | NI    | NI | 1.03  | 0.668    | -1.02 | 0.668    | -1.07 | 0.164    | 0.604    |
| 502 | P38117 | ETFB  | Electron transfer flavoprotein subunit beta           | Mitochondria | 2.4. Energy Metabolism - Oxidative Phosphorylation and Electron Transport | 8.29 | 27.71 | 61*   | 4  | 1.16  | 0.0877   | 1.18  | 0.0737   | 1.11  | 0.2      | 0.0684   |
| 503 | NI     | NI    | NI - Spot not identified by MS                        | NI           | 10. NI - Spot not identified by MS                                        | NI   | NI    | NI    | NI | 1.45  | 8.59E-03 | 1.76  | 4.50E-03 | 1.99  | 1.37E-05 | 2.97E-04 |
| 504 | NI     | NI    | NI - Spot not identified by MS                        | NI           | 10. NI - Spot not identified by MS                                        | NI   | NI    | NI    | NI | -2.03 | 2.08E-03 | -1.57 | 0.0591   | -1.39 | 0.147    | 0.0103   |
| 505 | P18669 | PGAM1 | Phosphoglycerate mutase 1                             | Cytoplasm    | 2.1. Energy Metabolism - Glycolysis                                       | 6.75 | 28.67 | 10.92 | 8  | 1.33  | 5.90E-05 | 1.2   | 4.66E-03 | 1.27  | 3.16E-03 | 6.31E-05 |
| 506 | NP     | NP    | NP - Spot not present in the preparative gel          | NP           | 11. NP - Spot not present in the preparative gel                          | NP   | NP    | NP    | NP | -1.05 | 0.545    | -1.04 | 0.636    | -1.05 | 0.579    | 0.355    |
| 507 | P18669 | PGAM1 | Phosphoglycerate mutase 1                             | Cytoplasm    | 2.1. Energy Metabolism - Glycolysis                                       | 6.75 | 28.67 | 80*   | 4  | 1.22  | 1.21E-03 | 1.22  | 4.31E-04 | 1.25  | 6.36E-05 | 1.56E-03 |
| 508 | P04792 | HSPB1 | Heat-shock protein beta-1 (Heat shock 27 kDa protein) | Cytoplasm    | 3. Stress Response and Apoptosis                                          | 5.98 | 22.78 | 53*   | 3  | -1.55 | 0.0313   | -1.19 | 0.375    | -1.1  | 0.661    | 0.105    |
| 509 | P30084 | ECHM  | Enoyl-CoA hydratase, mitochondrial                    | Mitochondria | 2.2. Energy Metabolism - Lipid Metabolism/ $\beta$ -Oxidation             | 5.88 | 28.34 | 9.51  | 3  | 1.03  | 0.891    | 1.37  | 2.94E-04 | 1.36  | 5.27E-04 | 3.92E-04 |
| 510 | P04792 | HSPB1 | Heat-shock protein beta-1 (Heat shock 27 kDa protein) | Cytoplasm    | 3. Stress Response and Apoptosis                                          | 5.98 | 22.78 | 9.5   | 7  | -1.22 | 0.0504   | 1.14  | 0.0216   | 1.07  | 0.295    | 8.96E-04 |
| 511 | NI     | NI    | NI - Spot not identified by MS                        | NI           | 10. NI - Spot not identified by MS                                        | NI   | NI    | NI    | NI | -1.4  | 8.73E-05 | -1.24 | 0.0321   | -1.66 | 4.02E-06 | 8.64E-04 |
| 512 | NI     | NI    | NI - Spot not identified by MS                        | NI           | 10. NI - Spot not identified by MS                                        | NI   | NI    | NI    | NI | 1.02  | 0.902    | 1.01  | 0.925    | -1.11 | 0.365    | 0.901    |
| 513 | NI     | NI    | NI - Spot not identified by MS                        | NI           | 10. NI - Spot not identified by MS                                        | NI   | NI    | NI    | NI | 1.03  | 0.825    | 1.07  | 0.743    | -1.05 | 0.58     | 0.562    |
| 514 | NI     | NI    | NI - Spot not identified by MS                        | NI           | 10. NI - Spot not identified by MS                                        | NI   | NI    | NI    | NI | -1.04 | 0.723    | -1.15 | 0.225    | -1.25 | 0.0319   | 0.176    |
| 515 | NI     | NI    | NI - Spot not identified by MS                        | NI           | 10. NI - Spot not identified by MS                                        | NI   | NI    | NI    | NI | 1.04  | 0.996    | 1.15  | 0.184    | 1.05  | 0.604    | 0.528    |
| 516 | NI     | NI    | NI - Spot not identified by MS                        | NI           | 10. NI - Spot not identified by MS                                        | NI   | NI    | NI    | NI | 1.66  | 4.16E-04 | 1.49  | 0.0207   | 1.57  | 6.97E-04 | 1.83E-04 |

|     |        |       |                                                                                    |              |                                                                           |           |           |       |    |       |          |       |          |       |          |          |
|-----|--------|-------|------------------------------------------------------------------------------------|--------------|---------------------------------------------------------------------------|-----------|-----------|-------|----|-------|----------|-------|----------|-------|----------|----------|
| 517 | NP     | NP    | NP - Spot not present in the preparative gel                                       | NP           | 11. NP - Spot not present in the preparative gel                          | NP        | NP        | NP    | NP | 2.02  | 1.39E-06 | 1.6   | 7.48E-04 | 1.8   | 2.31E-05 | 3.04E-07 |
| 518 | Q9NX63 | CHCH3 | Coiled-coil-helix-coiled-coil-helix domain-containing protein 3, mitochondrial     | Mitochondria | 9. Other Functions                                                        | undefined | undefined | 50*   | 4  | 1.03  | 0.381    | 1.07  | 0.142    | 1.01  | 0.785    | 0.39     |
| 519 | Q9UIJ7 | KAD3  | GTP:AMP phosphotransferase mitochondrial                                           | Mitochondria | 2.6. Other Metabolic Processes                                            | 9.16      | 25.43     | 11.73 | 7  | -1.21 | 0.0603   | 1.03  | 0.589    | -1.05 | 0.634    | 7.71E-03 |
| 520 | P62736 | ACTA  | Actin, aortic smooth muscle (Alpha-actin-2)                                        | Cytoskeleton | 1. Structural and Contractile Proteins                                    | 5.24      | 41.77     | 9.68  | 3  | -3.37 | 3.47E-03 | -2.5  | 0.0256   | -2.47 | 0.0188   | 1.88E-04 |
| 521 | NP     | NP    | NP - Spot not present in the preparative gel                                       | NP           | 11. NP - Spot not present in the preparative gel                          | NP        | NP        | NP    | NP | 1.35  | 0.058    | 1.43  | 0.0148   | 1.52  | 3.00E-04 | 0.0119   |
| 522 | P12829 | MYL4  | Myosin light polypeptide 4 (Myosin light chain 1, embryonic muscle/atrial isoform) | Cytoskeleton | 1. Structural and Contractile Proteins                                    | 4.98      | 21.43     | 6.19  | 5  | -2.38 | 3.89E-03 | -1.63 | 0.0596   | -1.32 | 0.179    | 3.74E-04 |
| 523 | O75489 | NDUS3 | NADH dehydrogenase [ubiquinone] iron-sulfur protein 3, mitochondrial               | Mitochondria | 2.4. Energy Metabolism - Oxidative Phosphorylation and Electron Transport | 5.48      | 26.41     | 13.02 | 10 | 1.13  | 0.472    | 1.07  | 0.605    | 1.12  | 0.405    | 0.788    |
| 524 | P12235 | ADT1  | ADP/ATP translocase 1                                                              | Mitochondria | 2.6. Other Metabolic Processes                                            | 9.78      | 32.93     | 46*   | 3  | -1.08 | 0.616    | -1.15 | 0.305    | -1.29 | 0.0859   | 0.0182   |
| 525 | NP     | NP    | NP - Spot not present in the preparative gel                                       | NP           | 11. NP - Spot not present in the preparative gel                          | NP        | NP        | NP    | NP | -1.3  | 0.0229   | -1.01 | 0.877    | -1.2  | 0.0914   | 0.0226   |
| 526 | Q9NX63 | CHCH3 | Coiled-coil-helix-coiled-coil-helix domain-containing protein 3, mitochondrial     | Mitochondria | 9. Other Functions                                                        | undefined | undefined | 58*   | 4  | 1.15  | 2.92E-03 | 1.19  | 2.98E-03 | 1.11  | 0.041    | 9.34E-03 |
| 527 | NI     | NI    | NI - Spot not identified by MS                                                     | NI           | 10. NI - Spot not identified by MS                                        | NI        | NI        | NI    | NI | 1.12  | 0.158    | 1.21  | 2.49E-03 | 1.21  | 7.08E-03 | 3.32E-03 |
| 528 | NI     | NI    | NI - Spot not identified by MS                                                     | NI           | 10. NI - Spot not identified by MS                                        | NI        | NI        | NI    | NI | -1.12 | 0.0636   | 1.04  | 0.521    | -1.1  | 0.069    | 0.0134   |
| 529 | P60174 | TPIS  | Triosephosphate isomerase                                                          | Cytoplasm    | 2.1. Energy Metabolism - Glycolysis                                       | 6.51      | 26.54     | 8.91  | 6  | -1.07 | 0.0277   | -1    | 0.877    | -1.11 | 2.06E-03 | 1.23E-03 |
| 530 | NI     | NI    | NI - Spot not identified by MS                                                     | NI           | 10. NI - Spot not identified by MS                                        | NI        | NI        | NI    | NI | 1.03  | 0.695    | 1.08  | 0.228    | 1.02  | 0.671    | 0.429    |
| 531 | P60174 | TPIS  | Triosephosphate isomerase                                                          | Cytoplasm    | 2.1. Energy Metabolism - Glycolysis                                       | 6.51      | 26.54     | 13.02 | 10 | 1.01  | 0.801    | 1     | 0.831    | -1.07 | 0.247    | 0.537    |
| 532 | P30041 | PRDX6 | Peroxiredoxin-6                                                                    | Cytoplasm    | 3. Stress Response and Apoptosis                                          | 6.02      | 24.90     | 61*   | 3  | -1.13 | 0.107    | -1.06 | 0.395    | -1.16 | 9.49E-03 | 0.285    |
| 533 | NP     | NP    | NP - Spot not present in the preparative gel                                       | NP           | 11. NP - Spot not present in the preparative gel                          | NP        | NP        | NP    | NP | 1.8   | 3.61E-07 | 1.45  | 1.88E-04 | 1.76  | 5.67E-08 | 2.53E-07 |
| 534 | NI     | NI    | NI - Spot not identified by MS                                                     | NI           | 10. NI - Spot not identified by MS                                        | NI        | NI        | NI    | NI | 1.12  | 0.036    | 1.08  | 0.134    | 1.08  | 0.101    | 0.209    |
| 535 | P30041 | PRDX6 | Peroxiredoxin-6                                                                    | Cytoplasm    | 3. Stress Response and Apoptosis                                          | 6.02      | 24.90     | 35.83 | 7  | -1.2  | 3.00E-03 | -1.05 | 0.293    | -1.22 | 8.80E-05 | 2.30E-06 |
| 536 | P30041 | PRDX6 | Peroxiredoxin-6                                                                    | Cytoplasm    | 3. Stress Response and Apoptosis                                          | 6.02      | 24.90     | 12.28 | 6  | -1.18 | 0.0137   | -1.11 | 0.0711   | -1.19 | 2.70E-03 | 5.14E-03 |
| 537 | NI     | NI    | NI - Spot not identified by MS                                                     | NI           | 10. NI - Spot not identified by MS                                        | NI        | NI        | NI    | NI | 1.19  | 5.21E-03 | 1.11  | 1.74E-03 | 1.1   | 0.0585   | 0.0258   |
| 538 | NI     | NI    | NI - Spot not identified by MS                                                     | NI           | 10. NI - Spot not identified by MS                                        | NI        | NI        | NI    | NI | 3.75  | 6.08E-05 | 1.87  | 0.0161   | 2.5   | 6.02E-04 | 2.66E-05 |
| 539 | O75489 | NDUS3 | NADH dehydrogenase [ubiquinone] iron-sulfur protein 3, mitochondrial               | Mitochondria | 2.4. Energy Metabolism - Oxidative Phosphorylation and Electron Transport | 5.48      | 26.41     | 10.61 | 5  | 1.16  | 4.98E-03 | 1.21  | 8.09E-04 | 1.16  | 0.0184   | 6.30E-03 |
| 540 | P60174 | TPIS  | Triosephosphate isomerase                                                          | Cytoplasm    | 2.1. Energy Metabolism - Glycolysis                                       | 6.51      | 26.54     | 63*   | 4  | 1.21  | 0.0278   | 1.04  | 0.293    | 1.12  | 0.0123   | 0.0613   |
| 541 | NP     | NP    | NP - Spot not present in the preparative gel                                       | NP           | 11. NP - Spot not present in the preparative gel                          | NP        | NP        | NP    | NP | 1.23  | 0.0597   | 1.29  | 0.0205   | 1.27  | 3.77E-03 | 0.0157   |
| 542 | P50461 | CSRP3 | Cysteine and glycine-rich protein 3                                                | Cytoplasm    | 9. Other Functions                                                        | 8.89      | 20.97     | 57*   | 4  | 2.26  | 8.87E-04 | 2.09  | 1.56E-03 | 2.34  | 1.08E-03 | 3.78E-07 |
| 543 | NP     | NP    | NP - Spot not present in the preparative gel                                       | NP           | 11. NP - Spot not present in the preparative gel                          | NP        | NP        | NP    | NP | 1.22  | 0.0556   | 1.08  | 0.49     | 1.1   | 0.134    | 0.0178   |
| 544 | NI     | NI    | NI - Spot not identified by MS                                                     | NI           | 10. NI - Spot not identified by MS                                        | NI        | NI        | NI    | NI | -1.01 | 0.873    | -1.08 | 0.28     | 1.03  | 0.497    | 0.079    |
| 545 | NI     | NI    | NI - Spot not identified by MS                                                     | NI           | 10. NI - Spot not identified by MS                                        | NI        | NI        | NI    | NI | 1.05  | 0.469    | -1.08 | 0.344    | -1.04 | 0.648    | 0.806    |
| 546 | NP     | NP    | NP - Spot not present in the preparative gel                                       | NP           | 11. NP - Spot not present in the preparative gel                          | NP        | NP        | NP    | NP | -1.37 | 4.84E-04 | -1.22 | 0.014    | -1.27 | 1.63E-03 | 1.26E-03 |
| 547 | P30042 | ES1   | ES1 protein homolog, mitochondrial                                                 | Mitochondria | 9. Other Functions                                                        | 6.63      | 24.02     | 69*   | 4  | -1.1  | 0.412    | 1.07  | 0.313    | -1.09 | 0.414    | 0.034    |
| 548 | P24539 | AT5F1 | ATP synthase subunit b, mitochondrial                                              | Mitochondria | 2.4. Energy Metabolism - Oxidative Phosphorylation and Electron Transport | 9.10      | 24.63     | 61*   | 11 | -1.43 | 1.35E-05 | -1.12 | 0.0556   | -1.33 | 9.06E-05 | 4.58E-06 |
| 549 | P28161 | GSTM2 | Glutathione S-transferase Mu 2                                                     | Cytoplasm    | 2.6. Other Metabolic Processes                                            | 6.02      | 25.61     | 48*   | 4  | -1.14 | 0.0494   | -1.07 | 0.195    | -1.22 | 1.92E-04 | 2.44E-05 |
| 550 | NI     | NI    | NI - Spot not identified by MS                                                     | NI           | 10. NI - Spot not identified by MS                                        | NI        | NI        | NI    | NI | -1.14 | 0.0229   | -1.05 | 0.258    | -1.09 | 0.158    | 0.12     |
| 551 | NI     | NI    | NI - Spot not identified by MS                                                     | NI           | 10. NI - Spot not identified by MS                                        | NI        | NI        | NI    | NI | -1.05 | 0.534    | 1.02  | 0.772    | -1.07 | 0.302    | 0.727    |
| 552 | NI     | NI    | NI - Spot not identified by MS                                                     | NI           | 10. NI - Spot not identified by MS                                        | NI        | NI        | NI    | NI | -1.25 | 0.0281   | 1.01  | 0.824    | -1.14 | 0.081    | 9.18E-03 |
| 553 | NP     | NP    | NP - Spot not present in the preparative gel                                       | NP           | 11. NP - Spot not present in the preparative gel                          | NP        | NP        | NP    | NP | -1.32 | 5.27E-05 | -1.15 | 0.0118   | -1.31 | 3.06E-03 | 3.26E-04 |

|     |        |       |                                                                                             |              |                                                                           |      |        |       |    |       |          |       |          |       |          |          |
|-----|--------|-------|---------------------------------------------------------------------------------------------|--------------|---------------------------------------------------------------------------|------|--------|-------|----|-------|----------|-------|----------|-------|----------|----------|
| 554 | NI     | NI    | NI - Spot not identified by MS                                                              | NI           | 10. NI - Spot not identified by MS                                        | NI   | NI     | NI    | NI | -3.35 | 3.43E-03 | -2.11 | 0.0209   | -2.5  | 6.52E-03 | 1.26E-03 |
| 555 | Q9ULI4 | KI26A | Kinesin-like protein KIF26A                                                                 | Cytoskeleton | 1. Structural and Contractile Proteins                                    | 9.12 | 194.59 | 72*   | 10 | -1.36 | 0.19     | -1.92 | 6.47E-03 | -1.6  | 0.0489   | 0.0193   |
| 556 | NP     | NP    | NP - Spot not present in the preparative gel                                                | NP           | 11. NP - Spot not present in the preparative gel                          | NP   | NP     | NP    | NP | -1.98 | 7.39E-03 | -1.7  | 0.043    | -1.78 | 0.0241   | 8.03E-03 |
| 557 | NI     | NI    | NI - Spot not identified by MS                                                              | NI           | 10. NI - Spot not identified by MS                                        | NI   | NI     | NI    | NI | -1.11 | 0.187    | -1.01 | 0.826    | -1.09 | 0.169    | 0.197    |
| 558 | P24539 | AT5F1 | ATP synthase subunit b, mitochondrial                                                       | Mitochondria | 2.4. Energy Metabolism - Oxidative Phosphorylation and Electron Transport | 9.10 | 24.63  | 68*   | 8  | -1.17 | 0.122    | 1     | 0.927    | -1.12 | 0.25     | 0.0366   |
| 559 | P02647 | APOA1 | Apolipoprotein A-I precursor                                                                | Secreted     | 9. Other Functions                                                        | 5.27 | 28.08  | 62*   | 4  | 1.01  | 0.964    | -1.02 | 0.748    | -1.07 | 0.435    | 0.74     |
| 560 | P25787 | PSA2  | Proteasome subunit alpha type-2                                                             | Cytoplasm    | 8. Proteasome-Ubiquitin Process                                           | 7.12 | 25.77  | 56*   | 3  | 1.08  | 0.448    | -1.07 | 0.64     | 1.02  | 0.705    | 0.38     |
| 561 | P30043 | BLVRB | Flavin reductase                                                                            | Cytoplasm    | 2.6. Other Metabolic Processes                                            | 7.31 | 21.99  | 51*   | 3  | -1.44 | 1.64E-03 | -1.26 | 0.0341   | -1.46 | 2.74E-03 | 1.14E-04 |
| 562 | NI     | NI    | NI - Spot not identified by MS                                                              | NI           | 10. NI - Spot not identified by MS                                        | NI   | NI     | NI    | NI | 1.06  | 0.571    | 1.03  | 0.913    | -1.02 | 0.674    | 0.968    |
| 563 | P08590 | MYL3  | Myosin light polypeptide 3 (Myosin light chain 1, slow-twitch muscle B/ventricular)         | Cytoskeleton | 1. Structural and Contractile Proteins                                    | 5.03 | 21.80  | 10.3  | 4  | -1.05 | 0.578    | -1.05 | 0.597    | -1.1  | 0.326    | 0.863    |
| 564 | P08590 | MYL3  | Myosin light polypeptide 3 (Myosin light chain 1, slow-twitch muscle B/ventricular)         | Cytoskeleton | 1. Structural and Contractile Proteins                                    | 5.03 | 21.80  | 13.84 | 7  | -1.13 | 0.105    | -1.02 | 0.815    | -1.15 | 0.139    | 0.437    |
| 565 | P08670 | VIME  | Vimentin                                                                                    | Cytoskeleton | 1. Structural and Contractile Proteins                                    | 5.06 | 53.52  | 53*   | 5  | -1.29 | 6.18E-05 | -1.04 | 0.348    | -1.28 | 1.45E-06 | 5.19E-06 |
| 566 | P08590 | MYL3  | Myosin light polypeptide 3 (Myosin light chain 1, slow-twitch muscle B/ventricular isoform) | Cytoskeleton | 1. Structural and Contractile Proteins                                    | 5.03 | 21.80  | 7.41  | 3  | -1.26 | 6.91E-04 | -1.09 | 0.194    | -1.2  | 1.32E-03 | 0.031    |
| 567 | P19404 | NDUV2 | NADH dehydrogenase [ubiquinone] flavoprotein 2, mitochondrial                               | Mitochondria | 2.4. Energy Metabolism - Oxidative Phosphorylation and Electron Transport | 5.71 | 23.76  | 48*   | 3  | -1.29 | 5.05E-05 | -1.12 | 1.24E-03 | -1.35 | 2.04E-09 | 1.26E-06 |
| 568 | NI     | NI    | NI - Spot not identified by MS                                                              | NI           | 10. NI - Spot not identified by MS                                        | NI   | NI     | NI    | NI | -1.11 | 0.0634   | 1.04  | 0.438    | -1.14 | 3.54E-03 | 0.0314   |
| 569 | NP     | NP    | NP - Spot not present in the preparative gel                                                | NP           | 11. NP - Spot not present in the preparative gel                          | NP   | NP     | NP    | NP | -1.18 | 0.332    | -1.1  | 0.641    | -1.3  | 0.0888   | 0.0718   |
| 570 | NI     | NI    | NI - Spot not identified by MS                                                              | NI           | 10. NI - Spot not identified by MS                                        | NI   | NI     | NI    | NI | -1.09 | 0.156    | -1.09 | 0.0309   | -1.15 | 0.011    | 0.148    |
| 571 | NI     | NI    | NI - Spot not identified by MS                                                              | NI           | 10. NI - Spot not identified by MS                                        | NI   | NI     | NI    | NI | -1.14 | 0.0187   | -1.05 | 0.31     | -1.14 | 5.95E-03 | 0.238    |
| 572 | P24539 | AT5F1 | ATP synthase subunit b, mitochondrial                                                       | Mitochondria | 2.4. Energy Metabolism - Oxidative Phosphorylation and Electron Transport | 9.10 | 24.63  | 64*   | 7  | -1.59 | 6.44E-04 | -1.37 | 2.76E-03 | -1.32 | 1.48E-03 | 9.16E-05 |
| 573 | Q96F14 | NEIL1 | Endonuclease VIII-like 1                                                                    | Nucleus      | 3. Stress Response and Apoptosis                                          | 9.94 | 43.55  | 54*   | 3  | -1.43 | 7.56E-04 | -1.16 | 0.0706   | -1.37 | 8.44E-05 | 3.50E-04 |
| 574 | NI     | NI    | NI - Spot not identified by MS                                                              | NI           | 10. NI - Spot not identified by MS                                        | NI   | NI     | NI    | NI | -1.29 | 9.05E-03 | -1.1  | 0.229    | -1.36 | 1.70E-03 | 1.04E-03 |
| 575 | P09211 | GSTP1 | Glutathione S-transferase P                                                                 | Cytoplasm    | 2.6. Other Metabolic Processes                                            | 5.44 | 23.22  | 68*   | 5  | -1.02 | 0.704    | -1.13 | 7.24E-03 | -1.15 | 4.53E-03 | 5.82E-03 |
| 576 | NI     | NI    | NI - Spot not identified by MS                                                              | NI           | 10. NI - Spot not identified by MS                                        | NI   | NI     | NI    | NI | 1.3   | 0.361    | 1.71  | 0.078    | 1.22  | 0.0324   | 0.274    |
| 577 | NI     | NI    | NI - Spot not identified by MS                                                              | NI           | 10. NI - Spot not identified by MS                                        | NI   | NI     | NI    | NI | 1.08  | 0.256    | -1.05 | 0.462    | 1.07  | 0.226    | 0.0399   |
| 578 | P08590 | MYL3  | Myosin light polypeptide 3 (Myosin light chain 1, slow-twitch muscle B/ventricular isoform) | Cytoskeleton | 1. Structural and Contractile Proteins                                    | 5.03 | 21.80  | 11.7  | 7  | -1.19 | 9.11E-04 | -1.09 | 0.0782   | -1.24 | 1.37E-03 | 9.74E-03 |
| 579 | P04179 | SODM  | Superoxide dismutase [Mn], mitochondrial                                                    | Mitochondria | 3. Stress Response and Apoptosis                                          | 6.86 | 22.20  | 7.83  | 6  | 1.03  | 0.819    | -1.12 | 0.182    | 1.05  | 0.405    | 0.139    |
| 580 | P00568 | KAD1  | Adenylate kinase isoenzyme 1                                                                | Cytoplasm    | 2.6. Other Metabolic Processes                                            | 8.73 | 21.63  | 6.75  | 4  | -1.47 | 2.23E-03 | -1.32 | 0.0106   | -1.26 | 6.72E-03 | 3.91E-03 |
| 581 | NI     | NI    | NI - Spot not identified by MS                                                              | NI           | 10. NI - Spot not identified by MS                                        | NI   | NI     | NI    | NI | -1.25 | 0.0273   | -1.08 | 0.428    | -1.18 | 0.0675   | 4.79E-04 |
| 582 | NI     | NI    | NI - Spot not identified by MS                                                              | NI           | 10. NI - Spot not identified by MS                                        | NI   | NI     | NI    | NI | 1.07  | 0.525    | -1.06 | 0.64     | 1.11  | 0.234    | 0.206    |
| 583 | P30086 | PEBP1 | Phosphatidylethanolamine-binding protein 1                                                  | Cytoplasm    | 9. Other Functions                                                        | 7.43 | 20.93  | 9.18  | 5  | -1.17 | 6.03E-03 | -1.06 | 0.193    | -1.19 | 3.35E-04 | 1.54E-03 |
| 584 | NI     | NI    | NI - Spot not identified by MS                                                              | NI           | 10. NI - Spot not identified by MS                                        | NI   | NI     | NI    | NI | -1.23 | 0.0129   | -1.12 | 0.141    | -1.2  | 0.0383   | 0.0102   |
| 585 | NI     | NI    | NI - Spot not identified by MS                                                              | NI           | 10. NI - Spot not identified by MS                                        | NI   | NI     | NI    | NI | 1.71  | 3.31E-03 | 1.17  | 0.0261   | 1.36  | 2.15E-05 | 7.76E-03 |
| 586 | P32119 | PRDX2 | Peroxiredoxin-2                                                                             | Cytoplasm    | 3. Stress Response and Apoptosis                                          | 5.67 | 21.76  | 8.52  | 6  | -1.16 | 1.93E-04 | -1.1  | 0.0208   | -1.17 | 8.42E-03 | 2.18E-03 |
| 587 | P02511 | CRYAB | Alpha crystallin B chain                                                                    | Cytoplasm    | 3. Stress Response and Apoptosis                                          | 6.76 | 20.16  | 8.13  | 3  | -1.29 | 0.0318   | -1.04 | 0.564    | -1.05 | 0.529    | 0.332    |
| 588 | O75947 | ATP5H | ATP synthase D chain, mitochondrial                                                         | Mitochondria | 2.4. Energy Metabolism - Oxidative Phosphorylation and Electron Transport | 5.22 | 18.36  | 9.1   | 7  | -1.26 | 8.51E-05 | -1.09 | 0.0387   | -1.23 | 1.46E-03 | 1.86E-05 |
| 589 | NI     | NI    | NI - Spot not identified by MS                                                              | NI           | 10. NI - Spot not identified by MS                                        | NI   | NI     | NI    | NI | -1.04 | 0.667    | -1.01 | 0.981    | 1.04  | 0.573    | 0.955    |
| 590 | NP     | NP    | NP - Spot not present in the preparative gel                                                | NP           | 11. NP - Spot not present in the preparative gel                          | NP   | NP     | NP    | NP | -1.09 | 0.117    | -1.06 | 0.341    | -1.1  | 0.0301   | 0.465    |



|     |        |       |                                                               |              |                                                                           |      |       |       |    |       |          |       |          |       |          |          |
|-----|--------|-------|---------------------------------------------------------------|--------------|---------------------------------------------------------------------------|------|-------|-------|----|-------|----------|-------|----------|-------|----------|----------|
| 591 | NI     | NI    | NI - Spot not identified by MS                                | NI           | 10. NI - Spot not identified by MS                                        | NI   | NI    | NI    | NI | -1.09 | 0.0528   | 1.03  | 0.589    | -1.04 | 0.306    | 0.35     |
| 592 | NI     | NI    | NI - Spot not identified by MS                                | NI           | 10. NI - Spot not identified by MS                                        | NI   | NI    | NI    | NI | -1.09 | 0.0828   | 1.01  | 0.852    | -1.07 | 0.188    | 0.572    |
| 593 | NP     | NP    | NP - Spot not present in the preparative gel                  | NP           | 11. NP - Spot not present in the preparative gel                          | NP   | NP    | NP    | NP | -1.29 | 9.09E-05 | -1.12 | 0.0399   | -1.23 | 2.45E-03 | 6.37E-04 |
| 594 | NI     | NI    | NI - Spot not identified by MS                                | NI           | 10. NI - Spot not identified by MS                                        | NI   | NI    | NI    | NI | -1.29 | 0.0213   | -1.14 | 0.242    | -1.15 | 0.03     | 0.459    |
| 595 | P51970 | NDUA8 | NADH dehydrogenase [ubiquinone] 1 alpha subcomplex subunit 8  | Mitochondria | 2.4. Energy Metabolism - Oxidative Phosphorylation and Electron Transport | 7.93 | 19.97 | 50*   | 3  | -1.01 | 0.975    | -1.1  | 0.461    | -1.16 | 0.265    | 0.655    |
| 596 | P63316 | TNNC1 | Troponin C, slow skeletal and cardiac muscles                 | Cytoskeleton | 1. Structural and Contractile Proteins                                    | 4.04 | 18.40 | 91*   | 6  | -1.01 | 0.9      | -1.06 | 0.662    | 1     | 0.982    | 0.986    |
| 597 | NP     | NP    | NP - Spot not present in the preparative gel                  | NP           | 11. NP - Spot not present in the preparative gel                          | NP   | NP    | NP    | NP | -1.34 | 0.108    | -1.59 | 0.0291   | -1.85 | 2.09E-03 | 0.0536   |
| 598 | Q9UBY9 | HSPB7 | Heat shock protein beta-7                                     | Cytoplasm    | 3. Stress Response and Apoptosis                                          | 6.04 | 18.61 | 50*   | 3  | 1.5   | 6.63E-04 | 1.4   | 0.0462   | 1.58  | 0.023    | 3.57E-03 |
| 599 | Q9Y281 | COF2  | Cofilin-2 (Cofilin, muscle isoform).                          | Cytoskeleton | 1. Structural and Contractile Proteins                                    | 7.88 | 18.61 | 45.49 | 7  | -1.12 | 0.212    | -1.04 | 0.547    | -1.28 | 0.0113   | 0.088    |
| 600 | NP     | NP    | NP - Spot not present in the preparative gel                  | NP           | 11. NP - Spot not present in the preparative gel                          | NP   | NP    | NP    | NP | -1.19 | 0.501    | -1.38 | 0.152    | -1.34 | 0.183    | 0.311    |
| 601 | NP     | NP    | NP - Spot not present in the preparative gel                  | NP           | 11. NP - Spot not present in the preparative gel                          | NP   | NP    | NP    | NP | 1     | 0.72     | -1.08 | 0.822    | -1.07 | 0.928    | 0.721    |
| 602 | NI     | NI    | NI - Spot not identified by MS                                | NI           | 10. NI - Spot not identified by MS                                        | NI   | NI    | NI    | NI | -1.25 | 0.0134   | -1.02 | 0.906    | -1.14 | 0.107    | 7.25E-03 |
| 603 | NI     | NI    | NI - Spot not identified by MS                                | NI           | 10. NI - Spot not identified by MS                                        | NI   | NI    | NI    | NI | 1.41  | 0.0481   | -1.16 | 0.154    | 1.08  | 0.577    | 0.0358   |
| 604 | NI     | NI    | NI - Spot not identified by MS                                | NI           | 10. NI - Spot not identified by MS                                        | NI   | NI    | NI    | NI | 1.22  | 0.0309   | 1.02  | 0.91     | 1.27  | 0.0221   | 0.0159   |
| 605 | NI     | NI    | NI - Spot not identified by MS                                | NI           | 10. NI - Spot not identified by MS                                        | NI   | NI    | NI    | NI | -1.35 | 1.80E-03 | -1.02 | 0.791    | -1.28 | 2.44E-03 | 7.85E-04 |
| 606 | P02144 | MYG   | Myoglobin                                                     | Cytoplasm    | 9. Other Functions                                                        | 7.29 | 17.05 | 42*   | 2  | -1.48 | 0.0239   | -1    | 0.737    | -1.1  | 0.381    | 0.118    |
| 607 | P05413 | FABPH | Fatty acid-binding protein, heart                             | Cytoplasm    | 7. Transport and Transmembrane Transport                                  | 6.34 | 14.73 | 8.45  | 4  | -1.01 | 0.956    | -1.34 | 0.152    | -1    | 0.915    | 0.543    |
| 608 | NI     | NI    | NI - Spot not identified by MS                                | NI           | 10. NI - Spot not identified by MS                                        | NI   | NI    | NI    | NI | -1.54 | 0.031    | 1.11  | 0.861    | -1.28 | 0.135    | 0.549    |
| 609 | NP     | NP    | NP - Spot not present in the preparative gel                  | NP           | 11. NP - Spot not present in the preparative gel                          | NP   | NP    | NP    | NP | -1.58 | 0.0134   | -1.16 | 0.48     | -1.39 | 0.0662   | 0.0291   |
| 610 | P02144 | MYG   | Myoglobin                                                     | Cytoplasm    | 9. Other Functions                                                        | 7.29 | 17.05 | 62*   | 3  | -1.17 | 0.0309   | 1.09  | 0.386    | -1.23 | 8.30E-05 | 1.18E-04 |
| 611 | NP     | NP    | NP - Spot not present in the preparative gel                  | NP           | 11. NP - Spot not present in the preparative gel                          | NP   | NP    | NP    | NP | 1.48  | 4.50E-03 | 1.14  | 0.414    | 1.34  | 0.0283   | 1.05E-03 |
| 612 | P02144 | MYG   | Myoglobin                                                     | Cytoplasm    | 9. Other Functions                                                        | 7.29 | 17.05 | 58*   | 3  | -1.44 | 0.0506   | -1.03 | 0.888    | -1.35 | 0.0747   | 0.101    |
| 613 | P02144 | MYG   | Myoglobin                                                     | Cytoplasm    | 9. Other Functions                                                        | 7.29 | 17.05 | 43*   | 2  | -1.86 | 8.93E-03 | -1.3  | 0.21     | -1.7  | 0.0176   | 0.0413   |
| 614 | P00568 | KAD1  | Adenylate kinase isoenzyme 1                                  | Cytoplasm    | 2.6. Other Metabolic Processes                                            | 8.73 | 21.63 | 10.94 | 6  | 1.35  | 0.0719   | 1.07  | 0.471    | 1.09  | 0.425    | 0.365    |
| 615 | NP     | NP    | NP - Spot not present in the preparative gel                  | NP           | 11. NP - Spot not present in the preparative gel                          | NP   | NP    | NP    | NP | 1.04  | 0.771    | 1.07  | 0.582    | -1.16 | 0.138    | 0.304    |
| 616 | NI     | NI    | NI - Spot not identified by MS                                | NI           | 10. NI - Spot not identified by MS                                        | NI   | NI    | NI    | NI | -4.41 | 4.68E-03 | -2.98 | 0.0241   | -3.11 | 0.0156   | 2.58E-04 |
| 617 | NI     | NI    | NI - Spot not identified by MS                                | NI           | 10. NI - Spot not identified by MS                                        | NI   | NI    | NI    | NI | -1.23 | 0.0382   | 1.14  | 0.0571   | -1.22 | 7.98E-03 | 1.47E-03 |
| 618 | NI     | NI    | NI - Spot not identified by MS                                | NI           | 10. NI - Spot not identified by MS                                        | NI   | NI    | NI    | NI | -1.15 | 0.0323   | -1.09 | 0.228    | -1.18 | 0.0659   | 0.077    |
| 619 | NI     | NI    | NI - Spot not identified by MS                                | NI           | 10. NI - Spot not identified by MS                                        | NI   | NI    | NI    | NI | 2.47  | 1.93E-04 | 2.18  | 8.00E-04 | 1.81  | 9.28E-03 | 4.46E-05 |
| 620 | Q9P0J0 | NDUAD | NADH dehydrogenase [ubiquinone] 1 alpha subcomplex subunit 13 | Mitochondria | 2.4. Energy Metabolism - Oxidative Phosphorylation and Electron Transport | 8.24 | 16.57 | 7.6   | 5  | -1.2  | 0.0232   | -1.04 | 0.586    | -1.25 | 2.22E-03 | 5.94E-03 |
| 621 | P31930 | QCR1  | Cytochrome b-c1 complex subunit 1, mitochondrial              | Mitochondria | 2.4. Energy Metabolism - Oxidative Phosphorylation and Electron Transport | 5.43 | 49.13 | 10.8  | 7  | -1.23 | 6.73E-04 | -1.05 | 0.29     | -1.17 | 2.26E-03 | 1.84E-04 |
| 622 | P02647 | APOA1 | Apolipoprotein A-I precursor                                  | Secreted     | 9. Other Functions                                                        | 5.27 | 28.08 | 11.1  | 8  | 1.91  | 3.91E-03 | 1.57  | 0.0298   | 1.78  | 0.0106   | 3.61E-03 |
| 623 | NI     | NI    | NI - Spot not identified by MS                                | NI           | 10. NI - Spot not identified by MS                                        | NI   | NI    | NI    | NI | -1.18 | 0.0152   | -1.16 | 0.0467   | -1.06 | 0.281    | 0.038    |
| 624 | P07195 | LDHB  | L-lactate dehydrogenase B chain                               | Cytoplasm    | 2.1. Energy Metabolism - Glycolysis                                       | 5.72 | 36.51 | 62*   | 6  | -1.18 | 0.023    | 1.04  | 0.536    | -1.14 | 0.0389   | 6.71E-05 |
| 625 | NI     | NI    | NI - Spot not identified by MS                                | NI           | 10. NI - Spot not identified by MS                                        | NI   | NI    | NI    | NI | -1.05 | 0.348    | -1.06 | 0.327    | -1.1  | 0.0422   | 0.426    |
| 626 | P02511 | CRYAB | Alpha crystallin B chain                                      | Cytoplasm    | 3. Stress Response and Apoptosis                                          | 6.76 | 20.16 | 7.83  | 3  | -1.1  | 0.111    | -1.02 | 0.674    | 1.03  | 0.66     | 0.525    |
| 627 | P07900 | HS90A | Heat shock protein HSP 90-alpha                               | Cytoplasm    | 3. Stress Response and Apoptosis                                          | 4.94 | 84.53 | 11.82 | 15 | 1.56  | 8.26E-04 | 1.27  | 0.0189   | 1.55  | 4.84E-05 | 6.85E-07 |

|     |        |       |                                                                         |                       |                                                                           |      |        |       |    |       |          |       |          |       |          |          |
|-----|--------|-------|-------------------------------------------------------------------------|-----------------------|---------------------------------------------------------------------------|------|--------|-------|----|-------|----------|-------|----------|-------|----------|----------|
| 628 | P68032 | ACTC  | Actin, alpha cardiac muscle 1 (Alpha-cardiac actin)                     | Cytoskeleton          | 1. Structural and Contractile Proteins                                    | 5.23 | 41.78  | 10.55 | 7  | -1.11 | 0.0108   | -1.06 | 0.192    | -1.1  | 0.157    | 0.0901   |
| 629 | P42126 | D3D2  | 3,2-trans-enoyl-CoA isomerase, mitochondrial                            | Mitochondria          | 2.2. Energy Metabolism - Lipid Metabolism/ $\beta$ -Oxidation             | 6.00 | 28.74  | 48*   | 3  | -1.35 | 9.17E-03 | -1.24 | 5.28E-03 | -1.03 | 0.584    | 1.68E-03 |
| 630 | P22695 | QCR2  | Cytochrome b-c1 complex subunit 2, mitochondrial                        | Mitochondria          | 2.4. Energy Metabolism - Oxidative Phosphorylation and Electron Transport | 7.74 | 46.78  | 12.89 | 8  | -1.36 | 1.77E-03 | -1.13 | 0.0357   | -1.32 | 1.39E-05 | 4.74E-09 |
| 631 | NI     | NI    | NI - Spot not identified by MS                                          | NI                    | 10. NI - Spot not identified by MS                                        | NI   | NI     | NI    | NI | 1.16  | 6.24E-03 | 1.01  | 0.979    | 1.26  | 9.09E-05 | 2.04E-06 |
| 632 | P25705 | ATPA  | ATP synthase subunit alpha, mitochondrial                               | Mitochondria          | 2.4. Energy Metabolism - Oxidative Phosphorylation and Electron Transport | 8.28 | 55.21  | 14.88 | 13 | 1.07  | 0.0641   | 1.09  | 0.0205   | 1.02  | 0.611    | 6.14E-03 |
| 633 | Q16851 | UGPA  | UTP--glucose-1-phosphate uridylyltransferase                            | Cytoplasm             | 2.6. Other Metabolic Processes                                            | 8.15 | 56.81  | 88*   | 9  | 1.56  | 3.38E-06 | 1.25  | 2.85E-04 | 1.36  | 5.98E-04 | 2.85E-06 |
| 634 | P35609 | ACTN2 | Alpha-actinin-2 (Alpha actinin skeletal muscle isoform 2)               | Cytoskeleton          | 1. Structural and Contractile Proteins                                    | 5.31 | 103.85 | 9.8   | 12 | 1.28  | 0.0301   | 1.09  | 0.385    | 1.23  | 0.137    | 0.0651   |
| 635 | P21912 | DHSB  | Succinate dehydrogenase [ubiquinone] iron-sulfur subunit, mitochondrial | Mitochondria          | 2.3. Energy Metabolism - Tricarboxylic Acid Cycle                         | 8.78 | 28.81  | 24.89 | 7  | -1.55 | 2.05E-05 | -1.15 | 0.0477   | -1.53 | 1.32E-05 | 8.61E-08 |
| 636 | NI     | NI    | NI - Spot not identified by MS                                          | NI                    | 10. NI - Spot not identified by MS                                        | NI   | NI     | NI    | NI | -2.24 | 4.12E-06 | -1.48 | 0.0168   | -2.37 | 1.24E-06 | 3.55E-07 |
| 637 | P09622 | DLDH  | Dihydrolipoyl dehydrogenase, mitochondrial precursor                    | Mitochondria          | 2.4. Energy Metabolism - Oxidative Phosphorylation and Electron Transport | 6.50 | 50.17  | 9.31  | 6  | 1.15  | 0.0314   | 1.13  | 0.085    | 1.17  | 0.0564   | 0.0205   |
| 638 | P10916 | MLRV  | Myosin regulatory light chain 2, ventricular/cardiac muscle isoform     | Cytoskeleton          | 1. Structural and Contractile Proteins                                    | 4.92 | 18.66  | 65*   | 5  | -1.36 | 0.0151   | -1.03 | 0.691    | -1.46 | 3.63E-03 | 0.0942   |
| 639 | P10916 | MLRV  | Myosin regulatory light chain 2, ventricular/cardiac muscle isoform     | Cytoskeleton          | 1. Structural and Contractile Proteins                                    | 4.92 | 18.66  | 65*   | 5  | -1.33 | 0.0173   | -1.02 | 0.72     | -1.45 | 9.37E-04 | 0.0996   |
| 640 | P10916 | MLRV  | Myosin regulatory light chain 2, ventricular/cardiac muscle isoform     | Cytoskeleton          | 1. Structural and Contractile Proteins                                    | 4.92 | 18.66  | 66*   | 5  | -1.28 | 2.47E-03 | -1.06 | 0.451    | -1.35 | 8.25E-04 | 4.28E-03 |
| 641 | P10916 | MLRV  | Myosin regulatory light chain 2, ventricular/cardiac muscle isoform     | Cytoskeleton          | 1. Structural and Contractile Proteins                                    | 4.92 | 18.66  | 129*  | 9  | -1.1  | 0.26     | -1.14 | 0.238    | -1.06 | 0.402    | 0.742    |
| 642 | P55084 | ECHB  | Trifunctional enzyme subunit beta, mitochondrial                        | Mitochondria          | 2.2. Energy Metabolism - Lipid Metabolism/ $\beta$ -Oxidation             | 9.24 | 47.48  | 7.89  | 5  | 1.06  | 0.619    | 1.42  | 0.0464   | 1.21  | 0.0875   | 0.0393   |
| 643 | P17540 | KCRS  | Creatine kinase, sarcomeric mitochondrial                               | Mitochondria          | 2.5. Energy Metabolism - Creatine Kinase System (Energy Transduction)     | 7.28 | 43.34  | 13.37 | 13 | -1.25 | 2.64E-03 | -1.08 | 0.391    | -1.13 | 0.0508   | 0.0412   |
| 644 | P02144 | MYG   | Myoglobin                                                               | Cytoplasm             | 9. Other Functions                                                        | 7.29 | 17.05  | 8.38  | 6  | -1.19 | 0.0536   | 1.04  | 0.819    | -1.31 | 1.49E-04 | 3.27E-03 |
| 645 | P17661 | DESM  | Desmin                                                                  | Cytoplasm             | 1. Structural and Contractile Proteins                                    | 5.21 | 53.40  | 9.49  | 14 | 1.3   | 0.0515   | 1.18  | 0.203    | 1.94  | 1.09E-05 | 2.62E-07 |
| 646 | NP     | NP    | NP - Spot not present in the preparative gel                            | NP                    | 11. NP - Spot not present in the preparative gel                          | NP   | NP     | NP    | NP | 1.6   | 4.42E-03 | 1.34  | 0.0523   | 2.26  | 9.44E-06 | 1.52E-07 |
| 647 | P25705 | ATPA  | ATP synthase subunit alpha, mitochondrial                               | Mitochondria          | 2.4. Energy Metabolism - Oxidative Phosphorylation and Electron Transport | 8.28 | 55.21  | 13.35 | 15 | 1.71  | 8.80E-05 | 1.19  | 0.0249   | 1.22  | 0.0184   | 2.09E-05 |
| 648 | P25705 | ATPA  | ATP synthase subunit alpha, mitochondrial                               | Mitochondria          | 2.4. Energy Metabolism - Oxidative Phosphorylation and Electron Transport | 8.28 | 55.21  | 15.22 | 14 | -1.09 | 0.118    | -1.01 | 0.828    | -1.11 | 0.0575   | 5.99E-03 |
| 649 | P14618 | KPYM  | Pyruvate kinase isozymes M1/M2                                          | Cytoplasm             | 2.1. Energy Metabolism - Glycolysis                                       | 7.95 | 57.81  | 68*   | 5  | 1.34  | 2.55E-03 | 1.05  | 0.331    | 1.2   | 5.02E-03 | 3.68E-03 |
| 650 | P11021 | GRP78 | 78 kDa glucose-regulated protein (Heat shock 70 kDa protein 5)          | Endoplasmic reticulum | 3. Stress Response and Apoptosis                                          | 5.01 | 70.48  | 43.5  | 12 | 1.51  | 6.80E-04 | 1.06  | 0.719    | 1.56  | 7.52E-03 | 3.46E-04 |
| 651 | P25705 | ATPA  | ATP synthase subunit alpha, mitochondrial                               | Mitochondria          | 2.4. Energy Metabolism - Oxidative Phosphorylation and Electron Transport | 8.28 | 55.21  | 76*   | 7  | 1.61  | 2.07E-05 | 1.29  | 1.82E-03 | 1.44  | 2.49E-04 | 5.01E-06 |
| 652 | P01024 | CO3   | Complement C3 precursor                                                 | Secreted              | 4. Immune Response                                                        | 6.00 | 184.95 | 12.31 | 17 | 1.21  | 0.0289   | 1.21  | 0.158    | 1.52  | 5.37E-04 | 0.0186   |
| 653 | O14763 | TR10B | Tumor necrosis factor receptor superfamily member 10B                   | Membrane              | 3. Stress Response and Apoptosis                                          | 4.97 | 42.23  | 51*   | 4  | 1.33  | 8.86E-06 | 1.01  | 0.969    | 1.08  | 0.0287   | 1.28E-05 |
| 654 | NP     | NP    | NP - Spot not present in the preparative gel                            | NP                    | 11. NP - Spot not present in the preparative gel                          | NP   | NP     | NP    | NP | 1.45  | 3.22E-03 | 1.2   | 0.239    | 1.46  | 1.24E-03 | 0.0368   |
| 655 | P49588 | SYAC  | Alanyl-tRNA synthetase, cytoplasmic                                     | Cytoplasm             | 6. Transcription and Translation Processes                                | 5.34 | 106.81 | 58*   | 8  | 1.68  | 1.02E-03 | 1.26  | 0.0818   | 1.61  | 1.22E-05 | 4.18E-03 |
| 656 | Q9UHP3 | UBP25 | Ubiquitin carboxyl-terminal hydrolase 25                                | Cytoplasm             | 2.6. Other Metabolic Processes                                            | 5.22 | 122.22 | 53*   | 8  | -1.03 | 0.771    | -1.06 | 0.461    | -1.11 | 0.149    | 0.121    |
| 657 | NP     | NP    | NP - Spot not present in the preparative gel                            | NP                    | 11. NP - Spot not present in the preparative gel                          | NP   | NP     | NP    | NP | 1.79  | 4.26E-04 | 1.09  | 0.364    | 1.62  | 1.40E-04 | 2.30E-07 |
| 658 | P02768 | ALBU  | Serum albumin precursor                                                 | Secreted              | 9. Other Functions                                                        | 5.67 | 66.47  | 9.64  | 8  | 2.38  | 5.65E-04 | 1.81  | 0.0107   | 1.91  | 1.49E-03 | 3.85E-04 |
| 659 | P55809 | SCOT1 | Succinyl-CoA:3-ketoadic-coenzyme A transferase 1, mitochondrial         | Mitochondria          | 2.6. Other Metabolic Processes                                            | 6.00 | 52.09  | 6.87  | 4  | 1.31  | 0.0724   | 1.08  | 0.449    | 1.35  | 7.18E-03 | 2.37E-03 |
| 660 | P11310 | ACADM | Medium-chain specific acyl-CoA dehydrogenase, mitochondrial             | Mitochondria          | 2.2. Energy Metabolism - Lipid Metabolism/ $\beta$ -Oxidation             | 7.02 | 43.64  | 9.86  | 8  | -1.34 | 4.26E-04 | -1.07 | 0.358    | -1.22 | 5.96E-03 | 3.30E-06 |
| 661 | P36957 | ODO2  | 2-oxoglutarate dehydrogenase E2 component, mitochondrial                | Mitochondria          | 2.3. Energy Metabolism - Tricarboxylic Acid Cycle                         | 5.90 | 41.39  | 9.26  | 4  | -1.09 | 0.096    | -1.03 | 0.579    | -1.04 | 0.408    | 0.0407   |
| 662 | P09972 | ALDOC | Fructose-bisphosphate aldolase C (Brain-type aldolase)                  | Cytoplasm             | 2.1. Energy Metabolism - Glycolysis                                       | 6.46 | 39.32  | 7.53  | 4  | -1.22 | 1.73E-03 | -1.04 | 0.365    | -1.24 | 1.20E-03 | 3.06E-05 |
| 663 | P00505 | AATM  | Aspartate aminotransferase, mitochondrial                               | Mitochondria          | 2.6. Other Metabolic Processes                                            | 8.98 | 44.74  | 8.15  | 5  | -1.06 | 0.492    | 1.03  | 0.716    | -1.02 | 0.88     | 0.548    |
| 664 | P07195 | LDHB  | L-lactate dehydrogenase B chain                                         | Cytoplasm             | 2.1. Energy Metabolism - Glycolysis                                       | 5.72 | 36.51  | 7.68  | 3  | -1.2  | 0.0267   | 1.08  | 0.384    | -1.13 | 0.085    | 2.76E-04 |

|     |        |       |                                                       |              |                                                                       |      |       |       |    |       |          |       |          |       |          |          |
|-----|--------|-------|-------------------------------------------------------|--------------|-----------------------------------------------------------------------|------|-------|-------|----|-------|----------|-------|----------|-------|----------|----------|
| 665 | P40925 | MDHC  | Malate dehydrogenase, cytoplasmic                     | Cytoplasm    | 2.6. Other Metabolic Processes                                        | 6.89 | 36.29 | 50*   | 5  | -1.14 | 0.0116   | -1.03 | 0.456    | -1.15 | 0.0294   | 3.18E-03 |
| 666 | Q16698 | DECR  | 2,4-dienoyl-CoA reductase, mitochondrial              | Mitochondria | 2.2. Energy Metabolism - Lipid Metabolism/ $\beta$ -Oxidation         | 8.79 | 32.15 | 33.81 | 4  | -1.28 | 0.0169   | 1.09  | 0.341    | -1.23 | 0.0174   | 2.00E-04 |
| 667 | P02743 | SAMP  | Serum amyloid P-component precursor                   | Secreted     | 3. Stress Response and Apoptosis                                      | 6.12 | 23.26 | 7.57  | 4  | 1.33  | 0.079    | 1.24  | 0.0223   | 1.53  | 3.32E-03 | 0.0104   |
| 668 | P04792 | HSPB1 | Heat-shock protein beta-1 (Heat shock 27 kDa protein) | Cytoplasm    | 3. Stress Response and Apoptosis                                      | 5.98 | 22.78 | 11.02 | 7  | -1.13 | 9.39E-03 | -1.04 | 0.376    | 1.03  | 0.713    | 0.0923   |
| 669 | NI     | NI    | NI - Spot not identified by MS                        | NI           | 10. NI - Spot not identified by MS                                    | NI   | NI    | NI    | NI | -1.04 | 0.672    | 1.09  | 0.285    | 1.01  | 0.817    | 0.372    |
| 670 | P60709 | ACTB  | Actin, cytoplasmic 1 (Beta-actin).                    | Cytoskeleton | 1. Structural and Contractile Proteins                                | 5.29 | 41.74 | 8.9   | 6  | 1.16  | 0.0431   | -1.09 | 0.0545   | 1     | 0.986    | 1.45E-03 |
| 671 | NP     | NP    | NP - Spot not present in the preparative gel          | NP           | 11. NP - Spot not present in the preparative gel                      | NP   | NP    | NP    | NP | -1.15 | 8.17E-03 | -1.03 | 0.548    | -1.13 | 0.0122   | 0.0272   |
| 672 | P02511 | CRYAB | Alpha crystallin B chain                              | Cytoplasm    | 3. Stress Response and Apoptosis                                      | 6.76 | 20.16 | 7.58  | 4  | -1.19 | 0.0965   | -1.19 | 0.0523   | -1.39 | 1.05E-04 | 0.203    |
| 673 | Q99497 | PARK7 | Protein DJ-1                                          | Nucleus      | 5. Cell Signaling                                                     | 6.33 | 19.89 | 61*   | 4  | 1.01  | 0.773    | -1.14 | 0.264    | -1.13 | 0.188    | 0.09     |
| 674 | P30048 | PRDX3 | Peroxiredoxin-3                                       | Mitochondria | 3. Stress Response and Apoptosis                                      | 5.77 | 21.47 | 7.14  | 4  | -1.15 | 3.15E-03 | -1    | 0.885    | -1.13 | 4.16E-03 | 0.0246   |
| 675 | P02144 | MYG   | Myoglobin                                             | Cytoplasm    | 9. Other Functions                                                    | 7.29 | 17.05 | 58*   | 3  | -1.61 | 7.28E-04 | -1.15 | 0.256    | -1.39 | 0.0105   | 2.41E-03 |
| 676 | P27144 | KAD4  | Adenylate kinase isoenzyme 4, mitochondrial           | Mitochondria | 2.6. Other Metabolic Processes                                        | 8.47 | 25.27 | 7.55  | 4  | -1.05 | 0.546    | 1.04  | 0.557    | -1.07 | 0.433    | 0.186    |
| 677 | NI     | NI    | NI - Spot not identified by MS                        | NI           | 10. NI - Spot not identified by MS                                    | NI   | NI    | NI    | NI | -1.33 | 7.95E-04 | 1     | 0.974    | -1.22 | 8.58E-03 | 6.29E-04 |
| 678 | P17661 | DESM  | Desmin                                                | Cytoplasm    | 1. Structural and Contractile Proteins                                | 5.21 | 53.40 | 64*   | 11 | 1.83  | 3.94E-03 | 1.59  | 0.0246   | 2.65  | 1.04E-05 | 4.45E-07 |
| 679 | P02144 | MYG   | Myoglobin                                             | Cytoplasm    | 9. Other Functions                                                    | 7.29 | 17.05 | 9.96  | 6  | -1.22 | 0.0374   | 1.07  | 0.534    | -1.29 | 4.56E-04 | 1.32E-03 |
| 680 | P36871 | PGM1  | Phosphoglucomutase-1                                  | Cytoplasm    | 2.6. Other Metabolic Processes                                        | 6.32 | 61.32 | 7.2   | 4  | 1.02  | 0.76     | -1.18 | 0.171    | -1.13 | 0.247    | 0.117    |
| 681 | P68032 | ACTC  | Actin, alpha cardiac muscle 1 (Alpha-cardiac actin)   | Cytoskeleton | 1. Structural and Contractile Proteins                                | 5.23 | 41.78 | 10.6  | 7  | -1.15 | 7.83E-04 | -1.09 | 6.61E-03 | -1.13 | 0.024    | 0.0172   |
| 682 | P09493 | TPM1  | Tropomyosin-1 alpha chain                             | Cytoskeleton | 1. Structural and Contractile Proteins                                | 4.69 | 32.71 | 8.77  | 10 | -1.21 | 2.00E-03 | -1.06 | 0.275    | -1.19 | 0.029    | 0.0123   |
| 683 | P06732 | KCRM  | Creatine kinase M-type                                | Cytoplasm    | 2.5. Energy Metabolism - Creatine Kinase System (Energy Transduction) | 6.77 | 43.10 | 11.93 | 8  | -1.82 | 2.86E-05 | -1.3  | 5.14E-03 | -1.93 | 7.81E-09 | 1.89E-11 |

**Index:** Number of the "spot" in the master gel (the gel with higher number of spots and used for reference for the matches).

**Uniprot:** Accession number of the protein in the UniProt (Universal Protein Resource) database.

**Symbol:** Name of protein entry in databases.

**Protein Description:** Protein name according to UniProt database.

**Function:** The metabolic process in which the protein is involved. Name: Protein name according to UniProt database.

**MS Identification - Score:** Identifications were performed in two ways: For values that do not have an asterisk, identification was performed using the in-house developed software "Poseidon". The "score" value represents the probability that the identification was performed randomly. Eg.: the value of 6.33 means that the probability of such identification being incorrect is  $10^{-6.33}$ . For values with an asterisk, identification was performed using the Mascot program ([www.matrixscience.com](http://www.matrixscience.com)). In this, the "score" value represents the absolute probability that the identification was performed randomly. The Mascot program considers events that have a randomness frequency lower than 5% as significant. In the searches performed in the experiments, "scores" greater than 53 were considered significant ( $p < 0.05$ ).

**MS Identification - Peptides:** number of peptides whose mass/charge ratio was identified by mass spectrometry and which correlated with theoretical values in the databases for the specific protein.

**NP:** "Spot" not present in the preparative gel.

**NI:** "Spot" not identified by mass spectrometry.
